# Supplementary material for: Putative Identification of New Phragmaline-Type Limonoids from the Leaves of Swietenia macrophylla King: A Case Study Using Mass Spectrometry-Based Molecular Networking
Source: MDPI journal article supplement (doi:10.3390/molecules28227603), 2023-11-15
Supplement: s1 [file s1]

## Supplementary Information

for

# Putative Identification of New Phragmaline-Type Limonoids from the Leaves of *Swietenia macrophylla* King: A Case Study Using Mass Spectrometry-Based Molecular Networking

José Diogo E. Reis <sup>1,2,†</sup>, Paulo Wender P. Gomes <sup>3,4,†,\*</sup>, Paulo R. da C. Sá <sup>5</sup>,  
Sônia das G. S. R. Pamplona <sup>1</sup>, Consuelo Yumiko Y. e Silva <sup>1,6</sup>, Maria Fátima das G. F. da Silva <sup>7</sup>,  
Anupam Bishayee <sup>8</sup> and Milton Nascimento da Silva <sup>1,2,6,\*</sup>

<sup>1</sup> Laboratory of Liquid Chromatography, Institute of Exact and Natural Sciences, Federal University of Pará, Belém 66075-110, Brazil; reisdiogo190@gmail.com (J.D.E.R.); sgsrp@ufpa.br (S.d.G.S.R.P.); yumikoyoshioka@yahoo.com.br (C.Y.Y.e.S.)

<sup>2</sup> Chemistry Post-Graduation Program, Institute of Exact and Natural Sciences, Federal University of Pará, Belém 66075-110, Brazil

<sup>3</sup> Collaborative Mass Spectrometry Innovation Center, Skaggs School of Pharmacy and Pharmaceutical Sciences, University of California San Diego, La Jolla, CA 92093, USA

<sup>4</sup> Skaggs School of Pharmacy and Pharmaceutical Sciences, University of California San Diego, La Jolla, CA 92093, USA

<sup>5</sup> Federal Institute of Pará, Campus Castanhal, Castanhal 68740-970, Brazil; paulo.sa@ifpa.edu.br

<sup>6</sup> Pharmaceutical Science Post-Graduation Program, Institute of Health Sciences, Federal University of Pará, Belém 66075-110, Brazil

<sup>7</sup> Department of Chemistry, Federal University of São Carlos, São Carlos 13565-905, Brazil; dmfs@ufscar.br

<sup>8</sup> College of Osteopathic Medicine, Lake Erie College of Osteopathic Medicine, Bradenton, FL 16509, USA; abishayee@lecom.edu or abishayee@gmail.com

\* Correspondence: wendergomes@health.ucsd.edu (P.W.P.G.); yumilton@yahoo.com.br (M.N.d.S.)

† These authors contributed equally to this work.

## List of Supporting Information

**Table S1.** HRMS and MS/MS data of the metabolites in *S. macrophylla* leaves extract detected by UPLC–MS/MS.

**Table S2.** In-house database containing 270 combinations of putative phragmalin-type limonoids.

**Table S3.** General fragmentation reactions observed in phragmalin-limonoid type.

**Figure S1.** Molecular network from *Swietenia macrophylla* G. King dichloromethane extract (DCMEt) using UPLC–HRMS in positive ionization mode ESI<sup>+</sup> (<https://gnps.ucsd.edu/ProteoSAFe/status.jsp?task=8b7d836ad2694de0b932cf65db8c3fae>). The network consist of 218 molecular features and the dataset be available in MassIVE CCMS MSV000087547 (<https://massive.ucsd.edu/ProteoSAFe/dataset.jsp?task=f6307135be7c416584e8327d36c07146>).

**Figure S2.** Fragmentation pattern of limonoid 1 computed from tandem MS data.

**Figure S3.** Fragmentation pattern of limonoid 2 computed from tandem MS data.

**Figure S4.** Fragmentation pattern of limonoid 3 computed from tandem MS data.

**Figure S5.** Fragmentation pattern of limonoid 4 computed from tandem MS data.

**Figure S6.** Fragmentation pattern of limonoid 5 computed from tandem MS data.

**Figure S7.** Fragmentation pattern of limonoid 6 computed from tandem MS data.

**Figure S8.** Fragmentation pattern of limonoid 7 computed from tandem MS data.

**Figure S9.** Fragmentation pattern of limonoid 8 computed from tandem MS data.

**Figure S10.** Fragmentation pattern of limonoid 9 computed from tandem MS data.

**Figure S11.** Fragmentation pattern of limonoid 10 computed from tandem MS data.

**Figure S12.** Fragmentation pattern of limonoid 11 computed from tandem MS data.

**Figure S13.** Fragmentation pattern of limonoid 12 computed from tandem MS data.

**Figure S14.** Fragmentation pattern of limonoid 13 computed from tandem MS data.

**Figure S15.** Fragmentation pattern of limonoid 14 computed from tandem MS data.

**Figure S16.** Fragmentation pattern of limonoid 15 computed from tandem MS data.

**Figure S17.** Fragmentation pattern of limonoid 16 computed from tandem MS data.

**Figure S18.** Fragmentation pattern of limonoid 17 computed from tandem MS data.

**Figure S19.** Fragmentation pattern of limonoid 18 computed from tandem MS data.

**Figure S20.** Fragmentation pattern of limonoid 19 computed from tandem MS data.

**Figure S21.** Fragmentation pattern of limonoid 20 computed from tandem MS data.

**Figure S22.** Fragmentation pattern of limonoid 21 computed from tandem MS data.

**Figure S23.** Fragmentation pattern of limonoid 22 computed from tandem MS data.

**Figure S24.** Fragmentation pattern of limonoid 23 computed from tandem MS data.

**Figure S25.** Fragmentation pattern of limonoid 24 computed from tandem MS data.

**Figure S26.** Fragmentation pattern of limonoid 25 computed from tandem MS data.

**Figure S27.** Fragmentation pattern of limonoid 26 computed from tandem MS data.

**Figure S28.** Fragmentation pattern of limonoid 27 computed from tandem MS data.

**Figure S29.** Fragmentation pattern of limonoid 28 computed from tandem MS data.

**Figure S30.** Fragmentation pattern of limonoid 29 computed from tandem MS data.

**Figure S31.** Fragmentation pattern of limonoid 30 computed from tandem MS data.

**Figure S32.** Fragmentation pattern of limonoid 31 computed from tandem MS data.

**Figure S33.** Fragmentation pattern of limonoid 32 computed from tandem MS data.

**Figure S34.** Fragmentation pattern of limonoid **33** computed from tandem MS data.

**Figure S35.** Fragmentation pattern of limonoid **34** computed from tandem MS data.

**Figure S36.** Fragmentation pattern of limonoid **35** computed from tandem MS data.

**Figure S37.** Fragmentation pattern of limonoid **36** computed from tandem MS data.

**Table S1.** HRMS and MS/MS data of the metabolites in *S. macrophylla* leaves extract detected by UPLC–MS/MS.

| Limonoid | RT<br>(min) | [M + H] <sup>+</sup>     |                       | Molecular<br>Formula                            | Error<br>(ppm) | MS <sup>2</sup> fragments (Intensity)                                                                                                                                                                                                                               | Limonoid name                                                                                   |
|----------|-------------|--------------------------|-----------------------|-------------------------------------------------|----------------|---------------------------------------------------------------------------------------------------------------------------------------------------------------------------------------------------------------------------------------------------------------------|-------------------------------------------------------------------------------------------------|
|          |             | Theoretical<br>mass (Da) | Accurate<br>mass (Da) |                                                 |                |                                                                                                                                                                                                                                                                     |                                                                                                 |
| Standard |             |                          |                       |                                                 |                |                                                                                                                                                                                                                                                                     |                                                                                                 |
| 1        | 10.7        | 773.3021                 | 773.3009              | C <sub>39</sub> H <sub>48</sub> O <sub>16</sub> | 1.55           | 755.2943 (100), 671.2351 (1.78), 653.2260 (0.84), 571.1826 (0.41), 553.1697 (0.41), 511.1585 (2.39), 493.1478 (0.63)                                                                                                                                                | 12 $\alpha$ -acetoxyl-20 $\beta$ ,21 $\beta$ -22 $\alpha$ ,23 $\alpha$ -diepoxysvietephragmin C |
| 2        | 10.8        | 699.2653                 | 699.2641              | C <sub>36</sub> H <sub>42</sub> O <sub>14</sub> | 1.71           | 681.2563 (11.77), 639.2449 (17.08), 621.2339 (17.53), 603.2226 (7.68), 579.2230 (30.56), 561.2123 (36.99), 543.2010 (8.70), 539.1902 (19.05), 525.2115 (9.76), 521.1803 (7.13), 497.1787 (5.15), 483.1996 (5.75), 479.1691 (29.13), 465.1894 (9.18), 461.1585 (100) | 2-deacetyl-6-acetoxysvietephragmin I                                                            |
| 3        | 11.8        | 699.2653                 | 699.2642              | C <sub>36</sub> H <sub>42</sub> O <sub>14</sub> | 1.57           | 639.2445 (100), 621.2340 (69.27), 603.2225 (30.12), 579.2221 (3.70), 539.1913 (53.03), 521.1802 (73.98), 511.1935 (2.95), 503.1713 (8.58), 497.1794 (9.96), 495.2019 (3.71), 493.1846 (5.89), 479.1692 (85.86), 461.1577 (74.62), 451.1736 (16.62)                  | 2-deacetyl-12 $\alpha$ -acetoxysvietephragmin I                                                 |
| 4        | 20.3        | 749.2809                 | 749.2807              | C <sub>40</sub> H <sub>44</sub> O <sub>14</sub> | 0.26           | 731.2728 (100), 661.2288 (2.78), 643.2185 (0.66), 635.2495 (2.78), 583.2158 (1.29), 539.1896 (0.43), 521.1814 (0.28), 479.1679 (1.29), 461.1568 (0.74)                                                                                                              | 3 $\beta$ -O-detigloyl-3 $\beta$ -O-benzoyl-6-O-acetylsvietephragmin D                          |
| 5        | 21.4        | 749.2809                 | 749.2801              | C <sub>40</sub> H <sub>44</sub> O <sub>14</sub> | 1.06           | 731.2728 (84.15), 689.2610 (2.99), 671.2506 (5.22), 661.2280 (0.93), 643.2156 (0.32), 601.2081 (0.67), 583.1951 (0.47), 575.2282 (0.75), 539.1898 (0.22), 487.1760 (0.23), 461.1576 (0.18)                                                                          | 3 $\beta$ -O-detigloyl-3 $\beta$ -O-benzoyl-12 $\alpha$ -acetoxysvietephragmin D                |
| 6        | 21.5        | 727.2966                 | 727.2962              | C <sub>38</sub> H <sub>46</sub> O <sub>14</sub> | 0.55           | 709.2883 (100), 657.2626 (0.06), 639.2449 (1.03), 621.2331 (0.45), 613.2652 (1.03), 609.2310 (0.07), 603.2210 (0.07), 579.2211 (0.09), 561.2241 (0.07)                                                                                                              | 12 $\alpha$ -acetoxysvietephragmin D                                                            |



|                  |      |          |          |                                                 |      |                                                                                                                                                                                                                                                                          |                                                                                      |
|------------------|------|----------|----------|-------------------------------------------------|------|--------------------------------------------------------------------------------------------------------------------------------------------------------------------------------------------------------------------------------------------------------------------------|--------------------------------------------------------------------------------------|
|                  |      |          |          |                                                 |      | 539.1913 (0.39), 525.2061 (0.07), 521.1810 (0.28),<br>479.1678 (0.06), 461.1579 (0.52)                                                                                                                                                                                   |                                                                                      |
| 7                | 22.9 | 727.2966 | 727.2958 | C <sub>38</sub> H <sub>46</sub> O <sub>14</sub> | 1.1  | 709.2883 (100), 667.2769 (1.97), 649.2654 (2.86),<br>639.2439 (0.32), 621.2316 (0.22), 603.2237 (0.14),<br>579.2228 (0.43), 561.2112 (0.45), 553.2416 (0.49),<br>539.1931 (0.23), 465.1859 (0.18), 461.1578 (0.16)                                                       | 6-O-acetyl-3'-<br>demethylswietephragmin E                                           |
| 8                | 24.1 | 739.2966 | 739.2972 | C <sub>39</sub> H <sub>46</sub> O <sub>14</sub> | 0.81 | 721.2885 (26.40), 679.2724 (0.13), 661.2657 (1.24),<br>639.2440 (0.39), 579.2263 (0.10), 561.2104 (0.14),<br>539.1929 (0.17)                                                                                                                                             | 12 $\alpha$ -acetoxyl-8,9,30-ortho-<br>tigloylate-swietemacrophine                   |
| 9                | 25.6 | 763.2966 | 763.2964 | C <sub>41</sub> H <sub>46</sub> O <sub>14</sub> | 0.26 | 745.2890 (100), 679.2402 (1.55), 661.2302 (10.34),<br>649.2664 (8.10), 643.2185 (1.56), 601.2065 (0.26),<br>583.2148 (1.12), 565.2051 (0.38), 539.1909 (0.84),<br>521.1804 (0.51), 479.1695 (2.42), 461.1579 (1.16)                                                      | 3 $\beta$ -O-detigloyl-3 $\beta$ -O-benzoyl-6-O-<br>acetylswietephragmin E           |
| 10               | 26.8 | 763.2966 | 763.2950 | C <sub>41</sub> H <sub>46</sub> O <sub>14</sub> | 2.09 | 661.2267 (48.55), 601.2056 (6.58), 583.1955 (3.06),<br>565.1890 (3.28), 505.1830 (4.82), 487.1731 (5.69),<br>479.1690 (12.33), 461.1578 (35.71), 451.1730 (3.12)                                                                                                         | 3 $\beta$ -O-detigloyl-3 $\beta$ -O-benzoyl-12 $\alpha$ -<br>acetoxyswietephragmin C |
| 11               | 26.9 | 741.3122 | 741.3123 | C <sub>39</sub> H <sub>48</sub> O <sub>14</sub> | 0.13 | 723.3041 (100), 657.2567 (0.30), 639.2449 (4.20),<br>627.2815 (3.97), 621.2335 (1.19), 539.1906 (1.01),<br>521.1787 (0.50), 479.1689 (1.46), 461.1581 (1.07)                                                                                                             | 6-O-acetylswietephragmin E                                                           |
| 12               | 28.3 | 741.3122 | 741.3120 | C <sub>39</sub> H <sub>48</sub> O <sub>14</sub> | 0.26 | 723.3043 (89.06), 681.2928 (3.45), 663.2821 (5.78),<br>639.2446 (1.07), 579.2230 (1.35), 567.2587 (1.01),<br>561.2118 (0.73), 539.1907 (0.56)                                                                                                                            | 12 $\alpha$ -acetoxyswietephragmin C                                                 |
| <i>Annotated</i> |      |          |          |                                                 |      |                                                                                                                                                                                                                                                                          |                                                                                      |
| 13               | 2.68 | 731.2551 | 731.2551 | C <sub>36</sub> H <sub>42</sub> O <sub>16</sub> | 0.0  | 713.2472 (100), 695.2362 (0.30), 671.2348 (0.91),<br>653.2240 (3.05), 635.2191 (0.14), 613.2025 (0.25),<br>593.2021 (0.74), 571.1804 (1.37), 553.1694 (1.49),<br>535.1584 (0.17), 511.1583 (2.35), 493.1482 (2.02),<br>479.1338 (0.18), 465.1530 (0.23), 461.1215 (0.21) | 6-acetoxyl-20,21-22,23-<br>diepoxyswietephragmin I                                   |

|     |      |          |          |                                                 |      |                                                                                                                                                                                                                                                                       |                                                                       |
|-----|------|----------|----------|-------------------------------------------------|------|-----------------------------------------------------------------------------------------------------------------------------------------------------------------------------------------------------------------------------------------------------------------------|-----------------------------------------------------------------------|
| 14  | 7.20 | 781.2708 | 781.2728 | C <sub>40</sub> H <sub>44</sub> O <sub>16</sub> | 2.56 | 763.2651 (50.86), 703.2379 (32.99), 675.2128 (11.21), 633.1935 (21.32), 615.1919 (14.89), 553.1708 (22.85), 511.1583 (80.91), 493.1476 (100), 483.1660 (9.82), 479.1285 (27.87), 475.1340 (16.92), 465.1535 (17.88), 461.1219 (32.05), 451.1344 (9.96)                | 3-detigloyl-3-benzoyl-12-acetoxyl-20,21-22,23-diepoxywietepragmin D   |
| 15  | 7.96 | 781.2708 | 781.2713 | C <sub>40</sub> H <sub>44</sub> O <sub>16</sub> | 0.64 | 763.2504 (21.23), 693.2157 (5.42), 675.2056 (6.19), 615.1839 (19.31), 571.1768 (11.85), 553.1737 (7.59), 511.1581 (71.22), 493.1480 (100), 483.1666 (12.05), 479.1317 (13.47), 475.1360 (17.10), 465.1523 (20.72), 461.1218 (36.72), 451.1428 (8.57)                  | 3-detigloyl-3-benzoyl-6-acetoxyl-20,21-22,23-diepoxywietepragmin D    |
| 16  | 9.89 | 721.2496 | 721.2496 | C <sub>38</sub> H <sub>40</sub> O <sub>14</sub> | 0.0  | 703.2388 (11.09), 661.2302 (16.29), 643.2188 (11.31), 625.2103 (2.78), 607.2183 (79.79), 601.2081 (2.96), 565.2065 (77.95), 547.1956 (9.42), 539.1906 (19.78), 529.1844 (7.88), 521.1808 (10.75), 497.1788 (11.86), 479.1693 (53.03), 461.1585 (100), 451.1756 (3.75) | 3-detigloyl-3-benzoyl-6-acetoxylwietepragmin I                        |
| 17* | 10.8 | 681.2547 | 681.2535 | C <sub>36</sub> H <sub>40</sub> O <sub>13</sub> | 1.76 | 639.2441 (23.21), 621.2336 (48.11), 603.2233 (16.68), 579.2217 (9.42), 539.1906 (75.13), 525.2102 (14.98), 521.1799 (51.70), 497.1802 (6.45), 493.1865 (12.12), 479.1673 (45.84), 461.1583 (68.58)                                                                    | 2-dehydroxyl-12-acetoxyswietepragmin I                                |
| 18  | 10.8 | 795.2864 | 795.2845 | C <sub>41</sub> H <sub>46</sub> O <sub>16</sub> | 2.38 | 735.2668 (4.60), 633.1978 (14.61), 615.1875 (7.70), 511.1584 (41.88), 493.1477 (100), 483.1626 (13.54), 479.1299 (14.01), 475.1375 (18.72), 469.1467 (5.25), 465.1540 (53.41), 461.1231 (35.36), 459.1805 (4.68), 451.1385 (32.58)                                    | 3-detigloyl-3-benzoyl-6-acetoxyl-20,21-22,23-diepoxywietepragmin E    |
| 19* | 11.1 | 623.2492 | 623.2483 | C <sub>34</sub> H <sub>38</sub> O <sub>11</sub> | 1.44 | 581.2389 (0.24), 563.2278 (4.39), 545.2165 (0.16), 481.1844 (0.68), 467.2045 (0.18), 463.1735 (1.50)                                                                                                                                                                  | 2-dehydroxyswietepragmin G                                            |
| 20  | 11.6 | 773.3021 | 773.3006 | C <sub>39</sub> H <sub>48</sub> O <sub>16</sub> | 1.93 | 755.2931 (100), 737.2772 (4.97), 671.2360 (13.97), 653.2255 (12.90), 593.2033 (18.85), 571.1821 (19.68), 561.1708 (4.99), 553.1685 (15.49), 511.1596 (71.13), 493.1477 (95.18), 479.1331 (17.84), 475.1399 (10.80), 465.1543 (13.21), 461.1217 (34.43)                | 2-dehydroxyl-6-hydroxyl-12-acetoxyl-20,21-22,23-diepoxywietepragmin C |

|     |      |          |          |                                                 |      |                                                                                                                                                                                                                                                                                                                           |                                                                                                             |
|-----|------|----------|----------|-------------------------------------------------|------|---------------------------------------------------------------------------------------------------------------------------------------------------------------------------------------------------------------------------------------------------------------------------------------------------------------------------|-------------------------------------------------------------------------------------------------------------|
| 21  | 12.5 | 739.2966 | 739.2958 | C <sub>39</sub> H <sub>46</sub> O <sub>14</sub> | 1.08 | 721.2869 (25.40), 639.2456 (0.81), 621.2408 (0.18), 539.1898 (0.15), 521.1777 (0.12), 479.1683 (0.24), 461.1589 (0.12)                                                                                                                                                                                                    | 2-dehydroxyl-6-acetoxyl-12-hydroxyl-8,9,30- <i>ortho</i> -tigloylate-swietemacrophine                       |
| 22  | 13.1 | 761.2809 | 761.2801 | C <sub>41</sub> H <sub>44</sub> O <sub>14</sub> | 1.05 | 743.2725 (23.01), 701.2587 (0.31), 683.2508 (1.63), 661.2281 (0.68), 643.2175 (0.10), 639.2410 (0.03), 601.2098 (0.13), 587.2244 (0.12), 583.1941 (0.14), 539.1986 (0.08), 521.1827 (0.03), 497.1748 (0.02), 493.1855 (0.07), 487.1740 (0.08), 479.1668 (0.04), 465.1853 (0.02), 461.1576 (0.08)                          | 2-dehydroxyl-3-detigloyl-3-benzoyl-6-acetoxyl-12-hydroxyl-8,9,30- <i>ortho</i> -tigloylate-swietemacrophine |
| 23* | 13.3 | 681.2547 | 681.2552 | C <sub>36</sub> H <sub>40</sub> O <sub>13</sub> | 0.73 | 639.2402 (6.37), 621.2333 (7.94), 579.2247 (9.13), 561.2117 (24.01), 539.1914 (32.83), 521.1778 (28.94), 503.1704 (17.10), 493.1833 (10.26), 479.1683 (45.11), 465.1900 (16.46), 461.1580 (61.97)                                                                                                                         | 2-dehydroxyl-6-acetoxyswietepragmin I                                                                       |
| 24  | 13.4 | 773.3021 | 773.3012 | C <sub>39</sub> H <sub>48</sub> O <sub>16</sub> | 1.16 | 755.2939 (61.20), 671.2369 (0.53), 653.2250 (1.31), 611.2106 (0.14), 593.2131 (0.08), 571.1783 (0.10), 553.1721 (0.05), 511.1610 (0.26), 493.1504 (0.06), 479.1349 (0.13), 475.1290 (0.14)                                                                                                                                | 6-acetoxyl-20,21-22,23-diepoxywietepragmin E                                                                |
| 25  | 14.2 | 739.2966 | 739.2961 | C <sub>39</sub> H <sub>46</sub> O <sub>14</sub> | 0.67 | 721.2883 (27.66), 679.2798 (0.15), 661.2664 (1.45), 639.2457 (0.53), 621.2319 (0.08), 603.2207 (0.03), 597.2354 (0.02), 579.2224 (0.12), 565.2438 (0.10), 561.2102 (0.15), 539.1891 (0.19), 521.1819 (0.02), 493.1864 (0.02), 483.2010 (0.03), 479.1696 (0.05), 465.1867 (0.08), 461.1588 (0.05)                          | 6-acetoxyl-12-deacetoxyl-8,9,30- <i>ortho</i> -tigloylate-swietemacrophine                                  |
| 26  | 14.4 | 735.2653 | 735.2664 | C <sub>39</sub> H <sub>42</sub> O <sub>14</sub> | 1.49 | 717.2563 (14.68), 679.2400 (3.17), 661.2306 (25.45), 643.2184 (12.84), 625.2101 (3.71), 621.2348 (55.42), 601.2087 (3.73), 583.2150 (2.82), 565.2072 (100), 557.1965 (2.63), 547.1906 (17.18), 539.1909 (18.22), 529.1876 (6.46), 521.1797 (11.33), 497.1775 (10.85), 479.1685 (61.81), 461.1582 (98.12), 451.1740 (5.25) | 3-detigloyl-3-benzoyl-12-acetoxyswietepragmin J                                                             |
| 27  | 15.2 | 763.2966 | 763.2965 | C <sub>41</sub> H <sub>46</sub> O <sub>14</sub> | 0.13 | 745.2875 (32.53), 703.2760 (11.78), 685.2656 (21.65), 661.2296 (10.52), 619.2180 (14.04), 601.2074 (100), 589.2418 (9.43), 583.1963 (34.69), 565.1854 (7.99), 539.1920 (7.50), 505.1837 (5.95), 487.1734 (22.00), 479.1685 (16.70), 461.1580 (53.85)                                                                      | 2-dehydroxyl-3-detigloyl-3-benzoyl-6-hydroxy-12-acetoxyswietepragmin C                                      |

|     |      |          |          |                                                 |      |                                                                                                                                                                                                                                                                                                                         |                                                                                         |
|-----|------|----------|----------|-------------------------------------------------|------|-------------------------------------------------------------------------------------------------------------------------------------------------------------------------------------------------------------------------------------------------------------------------------------------------------------------------|-----------------------------------------------------------------------------------------|
| 28  | 15.4 | 735.2653 | 735.2651 | C <sub>39</sub> H <sub>42</sub> O <sub>14</sub> | 0.27 | 717.2570 (100), 675.2446 (5.66), 661.2285 (0.78), 657.2336 (8.03), 643.2203 (0.19), 625.2021 (0.23), 619.2142 (0.16), 615.2366 (0.12), 601.2089 (0.82), 583.1938 (0.64), 565.1865 (0.17), 561.2112 (1.57), 539.1890 (0.19), 521.1834 (0.13), 487.1721 (0.26), 469.1534 (0.13), 461.1657 (0.19)                          | 3-detigloyl-3-benzoyl-6-acetoxysvietephragmin J                                         |
| 29* | 15.5 | 695.2704 | 695.2703 | C <sub>37</sub> H <sub>42</sub> O <sub>13</sub> | 0.14 | 639.2447 (0.03), 635.2346 (0.02), 621.2318 (0.24), 595.2141 (0.01), 579.2221 (0.02), 561.2120 (0.06), 543.1964 (0.01), 539.2025 (0.02), 533.2236 (0.02), 521.1804 (0.12), 517.2255 (0.02), 503.1706 (0.03), 483.1984 (0.01), 479.1680 (0.04), 465.1890 (0.05), 461.1584 (0.06)                                          | 2-dehydroxyl-6-acetoxysvietephragmin H                                                  |
| 30  | 15.5 | 713.2809 | 713.2812 | C <sub>37</sub> H <sub>44</sub> O <sub>14</sub> | 0.42 | 695.2706 (21.56), 639.2442 (11.49), 621.2332 (8.19), 599.2496 (23.94), 565.2441 (12.18), 543.2214 (63.34), 539.1906 (44.11), 525.2091 (6.11), 521.1771 (15.46), 497.1787 (6.79), 479.1684 (42.97), 461.1580 (100)                                                                                                       | 12-acetoxysvietephragmin J                                                              |
| 31  | 16.4 | 741.3122 | 741.3121 | C <sub>39</sub> H <sub>48</sub> O <sub>14</sub> | 0.13 | 723.3035 (100), 657.2541 (0.45), 639.2446 (1.55), 627.2798 (0.98), 621.2320 (0.66), 579.2173 (0.17), 539.1909 (0.42), 521.1719 (0.16), 479.1682 (0.60), 461.1587 (0.43)                                                                                                                                                 | 2-dehydroxyl-6-acetoxyl-12-hydroxysvietephragmin E                                      |
| 32  | 16.7 | 713.2809 | 713.2810 | C <sub>37</sub> H <sub>44</sub> O <sub>14</sub> | 0.14 | 695.2714 (31.48), 653.2609 (15.53), 639.2447 (3.94), 635.2509 (17.50), 603.2239 (8.24), 597.2304 (3.47), 579.2234 (43.48), 561.2118 (40.83), 553.2045 (6.64), 543.2022 (9.78), 539.2282 (17.89), 535.1922 (4.99), 521.1820 (5.61), 497.1783 (7.55), 483.2017 (6.66), 479.1695 (39.02), 465.1891 (14.50), 461.1593 (100) | 6-acetoxysvietephragmin J                                                               |
| 33  | 22.6 | 739.2966 | 739.2977 | C <sub>39</sub> H <sub>46</sub> O <sub>14</sub> | 1.48 | 721.2882 (100), 639.2453 (8.42), 625.2659 (11.83), 621.2325 (3.23), 539.1913 (18.34), 525.2119 (3.32), 521.1795 (7.31), 497.1816 (2.48), 479.1689 (21.23), 461.1583 (33.70)                                                                                                                                             | 2-dehydroxyl-6-hydroxyl-12-acetoxyl-8,9,30-ortho-tigloylate-svietemacrophine            |
| 34  | 22.6 | 761.2809 | 761.2812 | C <sub>41</sub> H <sub>44</sub> O <sub>14</sub> | 0.39 | 743.2717 (100), 661.2278 (21.88), 647.2474 (33.42), 643.2195 (11.95), 625.2043 (2.42), 565.2054 (7.59), 547.1970 (8.30), 539.1901 (12.06), 529.1814 (2.54),                                                                                                                                                             | 3-detigloyl-3-benzoyl-12-acetoxyl-6-deacetoxyl-8,9,30-ortho-tigloylate-svietemacrophine |

|    |      |          |          |                                                 |      |                                                                                                                                                                                    |                                                      |
|----|------|----------|----------|-------------------------------------------------|------|------------------------------------------------------------------------------------------------------------------------------------------------------------------------------------|------------------------------------------------------|
|    |      |          |          |                                                 |      | 521.1765 (8.95), 497.1825 (4.68), 479.1682 (42.73),<br>461.1581 (45.54), 451.1700 (4.84)                                                                                           |                                                      |
| 35 | 24.5 | 705.2911 | 705.2918 | C <sub>39</sub> H <sub>44</sub> O <sub>12</sub> | 0.98 | 687.2826 (47.29), 669.2675 (0.34), 621.2338 (0.78),<br>603.2215 (3.42), 591.2638 (2.28), 585.2136 (0.96),<br>525.2098 (0.62), 507.1990 (0.22), 481.1842 (0.78),<br>463.1718 (1.05) | 2-hydroxy-3-detigloyl-3-benzoyl-<br>swietephragmin C |
| 36 | 26.0 | 683.3068 | 683.3069 | C <sub>37</sub> H <sub>46</sub> O <sub>12</sub> | 0.14 | 665.2974 (72.74), 647.2832 (0.12), 599.2455 (0.22),<br>581.2372 (2.40), 569.2735 (1.54), 563.2245 (0.86),<br>521.2119 (0.13), 481.1845 (0.90), 463.1740 (1.06)                     | 2-dehydroxyl-12-<br>hydroxyswietephragmin C          |

\* The positions of the acetate group and the double bond can be interchanged.

**Table S2.** *In-house* database containing 270 combinations of putative phragmalin-type limonoids.**Base structural for biosynthetic proposition of phragmalin-type limonoids**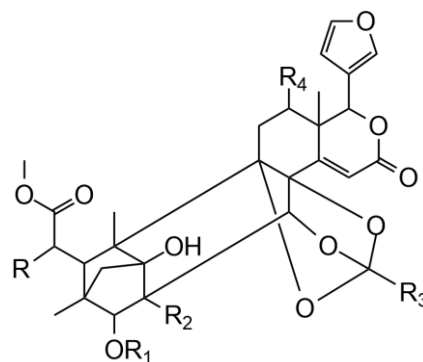**1-270**

| ID | Molecular Formula                               | Mass     |                                     | Functional group <sup>1</sup>                                                                          | Smiles                                                                                                              | References |
|----|-------------------------------------------------|----------|-------------------------------------|--------------------------------------------------------------------------------------------------------|---------------------------------------------------------------------------------------------------------------------|------------|
|    |                                                 | Neutral  | [M + H] <sup>+</sup><br>theoretical |                                                                                                        |                                                                                                                     |            |
| 1  | C <sub>34</sub> H <sub>40</sub> O <sub>12</sub> | 640.2520 | 641.2598                            | R = H. R <sub>1</sub> = Tg. R <sub>2</sub> = OH. R <sub>3</sub> = CH <sub>3</sub> . R <sub>4</sub> = H | OC12C3(O)C(OC(/C(C)=C/C)=O)C(C2)(C)C(C([H]))C(OC)=O)C1(C)C45C(C(C6(C)C([H]))C5)=CC(OC6C7=COC=C7)=O)(O8)C3OC8(C)O4   | [1]        |
| 2  | C <sub>36</sub> H <sub>38</sub> O <sub>12</sub> | 662.2363 | 663.2442                            | R = H. R <sub>1</sub> = Bz. R <sub>2</sub> = OH. R <sub>3</sub> = CH <sub>3</sub> . R <sub>4</sub> = H | OC12C3(O)C(OC(C4=CC=CC=C4)=O)C(C2)(C)C(C([H]))C(OC)=O)C1(C)C56C(C(C7(C)C([H]))C6)=CC(OC7C8=COC=C8)=O)(O9)C3OC9(C)O5 |            |

|   |                                                 |          |          |                                                                                                          |                                                                                                                         |       |
|---|-------------------------------------------------|----------|----------|----------------------------------------------------------------------------------------------------------|-------------------------------------------------------------------------------------------------------------------------|-------|
| 3 | C <sub>36</sub> H <sub>42</sub> O <sub>14</sub> | 698.2575 | 699.2653 | R = OAc. R <sub>1</sub> = Tg. R <sub>2</sub> = OH. R <sub>3</sub> = CH <sub>3</sub> . R <sub>4</sub> = H | OC12C3(O)C(OC(/C(C)=C/C)=O)C(C2)(C)C(C(OC(C)=O)C(OC)=O)C1(C)C45C(C(C6(C)C([H])C5)=CC(OC6C7=COC=C7)=O)(O8)C3OC8(C)O4     | [2]   |
| 4 | C <sub>38</sub> H <sub>40</sub> O <sub>14</sub> | 720.2418 | 721.2496 | R = OAc. R <sub>1</sub> = Bz. R <sub>2</sub> = OH. R <sub>3</sub> = CH <sub>3</sub> . R <sub>4</sub> = H | OC12C3(O)C(OC(C4=CC=CC=C4)=O)C(C2)(C)C(C(OC(C)=O)C(OC)=O)C1(C)C56C(C(C7(C)C([H])C6)=CC(OC7C8=COC=C8)=O)(O9)C3OC9(C)O5   |       |
| 5 | C <sub>36</sub> H <sub>42</sub> O <sub>13</sub> | 682.2625 | 683.2704 | R = H. R <sub>1</sub> = Tg. R <sub>2</sub> = OAc. R <sub>3</sub> = CH <sub>3</sub> . R <sub>4</sub> = H  | OC12C3(OC(C)=O)C(OC(/C(C)=C/C)=O)C(C2)(C)C(C([H])C(OC)=O)C1(C)C45C(C(C6(C)C([H])C5)=CC(OC6C7=COC=C7)=O)(O8)C3OC8(C)O4   | [3,4] |
| 6 | C <sub>38</sub> H <sub>40</sub> O <sub>13</sub> | 704.2469 | 705.2547 | R = H. R <sub>1</sub> = Bz. R <sub>2</sub> = OAc. R <sub>3</sub> = CH <sub>3</sub> . R <sub>4</sub> = H  | OC12C3(OC(C)=O)C(OC(C4=CC=CC=C4)=O)C(C2)(C)C(C([H])C(OC)=O)C1(C)C56C(C(C7(C)C([H])C6)=CC(OC7C8=COC=C8)=O)(O9)C3OC9(C)O5 |       |
| 7 | C <sub>36</sub> H <sub>42</sub> O <sub>14</sub> | 698.2575 | 699.2653 | R = H. R <sub>1</sub> = Tg. R <sub>2</sub> = OH. R <sub>3</sub> = CH <sub>3</sub> . R <sub>4</sub> = OAc | OC12C3(O)C(OC(/C(C)=C/C)=O)C(C2)(C)C(C([H])C(OC)=O)C1(C)C45C(C(C6(C)C(OC(C)=O)C5)=CC(OC6C7=COC=C7)=O)(O8)C3OC8(C)O4     | [2]   |
| 8 | C <sub>38</sub> H <sub>40</sub> O <sub>14</sub> | 720.2418 | 721.2496 | R = H. R <sub>1</sub> = Bz. R <sub>2</sub> = OH. R <sub>3</sub> = CH <sub>3</sub> . R <sub>4</sub> = OAc | OC12C3(O)C(OC(C4=CC=CC=C4)=O)C(C2)(C)C(C([H])C(OC)=O)C1(C)C56C(C(C7(                                                    |       |

|    |                                                 |          |          |                                                                                                            |                                                                                                                                          |
|----|-------------------------------------------------|----------|----------|------------------------------------------------------------------------------------------------------------|------------------------------------------------------------------------------------------------------------------------------------------|
|    |                                                 |          |          |                                                                                                            | <chem>C)C(OC(C)=O)C6)=CC(OC7C8=COC=C8)=O)(O9)C3OC9(C)O5</chem>                                                                           |
| 9  | C <sub>38</sub> H <sub>44</sub> O <sub>15</sub> | 740.2680 | 741.2758 | R = OAc, R <sub>1</sub> = Tg, R <sub>2</sub> = OAc, R <sub>3</sub> = CH <sub>3</sub> , R <sub>4</sub> = H  | <chem>OC12C3(OC(C)=O)C(OC(/C(C)=C/C)=O)C(C2)(C)C(C(OC(C)=O)C(OC)=O)C1(C)C45C(C(C6(C)C([H])C5)=CC(OC6C7=COC=C7)=O)(O8)C3OC8(C)O4</chem>   |
| 10 | C <sub>40</sub> H <sub>42</sub> O <sub>15</sub> | 762.2524 | 763.2602 | R = OAc, R <sub>1</sub> = Bz, R <sub>2</sub> = OAc, R <sub>3</sub> = CH <sub>3</sub> , R <sub>4</sub> = H  | <chem>OC12C3(OC(C)=O)C(OC(C4=CC=CC=C4)=O)C(C2)(C)C(C(OC(C)=O)C(OC)=O)C1(C)C56C(C(C7(C)C([H])C6)=CC(OC7C8=COC=C8)=O)(O9)C3OC9(C)O5</chem> |
| 11 | C <sub>38</sub> H <sub>44</sub> O <sub>16</sub> | 756.2629 | 757.2708 | R = OAc, R <sub>1</sub> = Tg, R <sub>2</sub> = OH, R <sub>3</sub> = CH <sub>3</sub> , R <sub>4</sub> = OAc | <chem>OC12C3(O)C(OC(/C(C)=C/C)=O)C(C2)(C)C(C(OC(C)=O)C(OC)=O)C1(C)C45C(C(C6(C)C(OC(C)=O)C5)=CC(OC6C7=COC=C7)=O)(O8)C3OC8(C)O4</chem>     |
| 12 | C <sub>40</sub> H <sub>42</sub> O <sub>16</sub> | 778.2473 | 779.2551 | R = OAc, R <sub>1</sub> = Bz, R <sub>2</sub> = OH, R <sub>3</sub> = CH <sub>3</sub> , R <sub>4</sub> = OAc | <chem>OC12C3(O)C(OC(C4=CC=CC=C4)=O)C(C2)(C)C(C(OC(C)=O)C(OC)=O)C1(C)C56C(C(C7(C)C(OC(C)=O)C6)=CC(OC7C8=COC=C8)=O)(O9)C3OC9(C)O5</chem>   |
| 13 | C <sub>38</sub> H <sub>44</sub> O <sub>15</sub> | 740.2680 | 741.2758 | R = H, R <sub>1</sub> = Tg, R <sub>2</sub> = OAc, R <sub>3</sub> = CH <sub>3</sub> , R <sub>4</sub> = OAc  | <chem>OC12C3(OC(C)=O)C(OC(/C(C)=C/C)=O)C(C2)(C)C(C(C([H])C(OC)=O)C1(C)C45C(C(C6(C)C(OC(C)=O)C5)=CC(OC6C7=COC=C7)=O)(O8)C3OC8(C)O4</chem> |

[2]



|    |                                                 |          |          |                                                                                                                          |                                                                                                                                 |     |
|----|-------------------------------------------------|----------|----------|--------------------------------------------------------------------------------------------------------------------------|---------------------------------------------------------------------------------------------------------------------------------|-----|
| 14 | C <sub>40</sub> H <sub>42</sub> O <sub>15</sub> | 762.2524 | 763.2602 | R = H. R <sub>1</sub> = Bz. R <sub>2</sub> = OAc. R <sub>3</sub> = CH <sub>3</sub> . R <sub>4</sub> = OAc                | OC12C3(OC(C)=O)C(OC(C4=CC=CC=C4)=O)C(C2)(C)C(C([H])C(OC)=O)C1(C)C56C(C(C7(C)C(OC(C)=O)C6)=CC(OC7C8=CO C=C8)=O)(O9)C3OC9(C)O5    | [2] |
| 15 | C <sub>40</sub> H <sub>46</sub> O <sub>17</sub> | 798.2735 | 799.2813 | R = OAc. R <sub>1</sub> = Tg. R <sub>2</sub> = OAc. R <sub>3</sub> = CH <sub>3</sub> . R <sub>4</sub> = OAc              | OC12C3(OC(C)=O)C(OC(/C(C)=C/C)=O)C(C2)(C)C(C(OC(C)=O)C(OC)=O)C1(C)C45C(C(C6(C)C(OC(C)=O)C5)=CC(OC6C7=COC=C7)=O)(O8)C3OC8(C)O4   |     |
| 16 | C <sub>42</sub> H <sub>44</sub> O <sub>17</sub> | 820.2578 | 821.2657 | R = OAc. R <sub>1</sub> = Bz. R <sub>2</sub> = OAc. R <sub>3</sub> = CH <sub>3</sub> . R <sub>4</sub> = OAc              | OC12C3(OC(C)=O)C(OC(C4=CC=CC=C4)=O)C(C2)(C)C(C(OC(C)=O)C(OC)=O)C1(C)C56C(C(C7(C)C(OC(C)=O)C6)=CC(OC7C8=COC=C8)=O)(O9)C3OC9(C)O5 |     |
| 17 | C <sub>35</sub> H <sub>42</sub> O <sub>12</sub> | 654.2676 | 655.2755 | R = H. R <sub>1</sub> = Tg. R <sub>2</sub> = OH. R <sub>3</sub> = CH <sub>2</sub> CH <sub>3</sub> . R <sub>4</sub> = H   | OC12C3(O)C(OC(/C(C)=C/C)=O)C(C2)(C)C(C([H])C(OC)=O)C1(C)C45C(C(C6(C)C([H])C5)=CC(OC6C7=COC=C7)=O)(O8)C3OC8(CC)O4                | [1] |
| 18 | C <sub>37</sub> H <sub>40</sub> O <sub>12</sub> | 676.2520 | 677.2598 | R = H. R <sub>1</sub> = Bz. R <sub>2</sub> = OH. R <sub>3</sub> = CH <sub>2</sub> CH <sub>3</sub> . R <sub>4</sub> = H   | OC12C3(O)C(OC(C4=CC=CC=C4)=O)C(C2)(C)C(C([H])C(OC)=O)C1(C)C56C(C(C7(C)C([H])C6)=CC(OC7C8=COC=C8)=O)(O9)C3OC9(CC)O5              |     |
| 19 | C <sub>37</sub> H <sub>44</sub> O <sub>14</sub> | 712.2731 | 713.2809 | R = OAc. R <sub>1</sub> = Tg. R <sub>2</sub> = OH. R <sub>3</sub> = CH <sub>2</sub> CH <sub>3</sub> . R <sub>4</sub> = H | OC12C3(O)C(OC(/C(C)=C/C)=O)C(C2)(C)C(C(OC(C)=O)C(OC)=O)C1(C)C45C(C(C6                                                           |     |

|    |                                                 |          |          |                                                                                                                          |                                                                                                                          |       |
|----|-------------------------------------------------|----------|----------|--------------------------------------------------------------------------------------------------------------------------|--------------------------------------------------------------------------------------------------------------------------|-------|
|    |                                                 |          |          |                                                                                                                          | (C)C([H])C5)=CC(OC6C7=COC=C7)=O)(O8)C3OC8(CC)O4                                                                          |       |
| 20 | C <sub>39</sub> H <sub>42</sub> O <sub>14</sub> | 734.2575 | 735.2653 | R = OAc, R <sub>1</sub> = Bz, R <sub>2</sub> = OH, R <sub>3</sub> = CH <sub>2</sub> CH <sub>3</sub> , R <sub>4</sub> = H | OC12C3(O)C(OC(C4=CC=CC=C4)=O)C(C2)(C)C(C(OC(C)=O)C(OC)=O)C1(C)C56C(C(C7(C)C([H])C6)=CC(OC7C8=COC=C8)=O)(O9)C3OC9(CC)O5   |       |
| 21 | C <sub>37</sub> H <sub>44</sub> O <sub>13</sub> | 696.2782 | 697.2860 | R = H, R <sub>1</sub> = Tg, R <sub>2</sub> = OAc, R <sub>3</sub> = CH <sub>2</sub> CH <sub>3</sub> , R <sub>4</sub> = H  | OC12C3(OC(C)=O)C(OC(/C(C)=C/C)=O)C(C2)(C)C(C([H])C(OC)=O)C1(C)C45C(C(C6(C)C([H])C5)=CC(OC6C7=COC=C7)=O)(O8)C3OC8(CC)O4   | [3,5] |
| 22 | C <sub>39</sub> H <sub>42</sub> O <sub>13</sub> | 718.2625 | 719.2704 | R = H, R <sub>1</sub> = Bz, R <sub>2</sub> = OAc, R <sub>3</sub> = CH <sub>2</sub> CH <sub>3</sub> , R <sub>4</sub> = H  | OC12C3(OC(C)=O)C(OC(C4=CC=CC=C4)=O)C(C2)(C)C(C([H])C(OC)=O)C1(C)C56C(C(C7(C)C([H])C6)=CC(OC7C8=COC=C8)=O)(O9)C3OC9(CC)O5 |       |
| 23 | C <sub>37</sub> H <sub>44</sub> O <sub>14</sub> | 712.2731 | 713.2809 | R = H, R <sub>1</sub> = Tg, R <sub>2</sub> = OH, R <sub>3</sub> = CH <sub>2</sub> CH <sub>3</sub> , R <sub>4</sub> = OAc | OC12C3(O)C(OC(/C(C)=C/C)=O)C(C2)(C)C(C([H])C(OC)=O)C1(C)C45C(C(C6(C)C(OC(C)=O)C5)=CC(OC6C7=COC=C7)=O)(O8)C3OC8(CC)O4     |       |
| 24 | C <sub>39</sub> H <sub>42</sub> O <sub>14</sub> | 734.2575 | 735.2653 | R = H, R <sub>1</sub> = Bz, R <sub>2</sub> = OH, R <sub>3</sub> = CH <sub>2</sub> CH <sub>3</sub> , R <sub>4</sub> = OAc | OC12C3(O)C(OC(C4=CC=CC=C4)=O)C(C2)(C)C(C([H])C(OC)=O)C1(C)C56C(C(C7(C)C(OC(C)=O)C6)=CC(OC7C8=COC=C8)=O)(O9)C3OC9(CC)O5   |       |

|    |                                                 |          |          |                                                                                                                            |                                                                                                                             |
|----|-------------------------------------------------|----------|----------|----------------------------------------------------------------------------------------------------------------------------|-----------------------------------------------------------------------------------------------------------------------------|
| 25 | C <sub>39</sub> H <sub>46</sub> O <sub>15</sub> | 754.2837 | 755.2915 | R = OAc. R <sub>1</sub> = Tg. R <sub>2</sub> = OAc. R <sub>3</sub> = CH <sub>2</sub> CH <sub>3</sub> . R <sub>4</sub> = H  | OC12C3(OC(C)=O)C(OC(/C(C)=C/C)=O)C(C2)(C)C(C(OC(C)=O)C(OC)=O)C1(C)C45C(C(C6(C)C([H])C5)=CC(OC6C7=COC=C7)=O)(O8)C3OC8(CC)O4  |
| 26 | C <sub>41</sub> H <sub>44</sub> O <sub>15</sub> | 776.2680 | 777.2758 | R = OAc. R <sub>1</sub> = Bz. R <sub>2</sub> = OAc. R <sub>3</sub> = CH <sub>2</sub> CH <sub>3</sub> . R <sub>4</sub> = H  | OC12C3(OC(C)=O)C(OC(C4=CC=CC=C4)=O)C(C2)(C)C(C(OC(C)=O)C(OC)=O)C1(C)C56C(C(C7(C)C([H])C6)=CC(OC7C8=CO=C8)=O)(O9)C3OC9(CC)O5 |
| 27 | C <sub>39</sub> H <sub>46</sub> O <sub>16</sub> | 770.2786 | 771.2864 | R = OAc. R <sub>1</sub> = Tg. R <sub>2</sub> = OH. R <sub>3</sub> = CH <sub>2</sub> CH <sub>3</sub> . R <sub>4</sub> = OAc | OC12C3(O)C(OC(/C(C)=C/C)=O)C(C2)(C)C(C(OC(C)=O)C(OC)=O)C1(C)C45C(C(C6(C)C(OC(C)=O)C5)=CC(OC6C7=COC=C7)=O)(O8)C3OC8(CC)O4    |
| 28 | C <sub>41</sub> H <sub>44</sub> O <sub>16</sub> | 792.2629 | 793.2708 | R = OAc. R <sub>1</sub> = Bz. R <sub>2</sub> = OH. R <sub>3</sub> = CH <sub>2</sub> CH <sub>3</sub> . R <sub>4</sub> = OAc | OC12C3(O)C(OC(C4=CC=CC=C4)=O)C(C2)(C)C(C(OC(C)=O)C(OC)=O)C1(C)C56C(C(C7(C)C(OC(C)=O)C6)=CC(OC7C8=CO=C8)=O)(O9)C3OC9(CC)O5   |
| 29 | C <sub>39</sub> H <sub>46</sub> O <sub>15</sub> | 754.2837 | 755.2915 | R = H. R <sub>1</sub> = Tg. R <sub>2</sub> = OAc. R <sub>3</sub> = CH <sub>2</sub> CH <sub>3</sub> . R <sub>4</sub> = OAc  | OC12C3(OC(C)=O)C(OC(/C(C)=C/C)=O)C(C2)(C)C(C([H])C(OC)=O)C1(C)C45C(C(C6(C)C(OC(C)=O)C5)=CC(OC6C7=COC=C7)=O)(O8)C3OC8(CC)O4  |
| 30 | C <sub>41</sub> H <sub>44</sub> O <sub>15</sub> | 776.2680 | 777.2758 | R = H. R <sub>1</sub> = Bz. R <sub>2</sub> = OAc. R <sub>3</sub> = CH <sub>2</sub> CH <sub>3</sub> . R <sub>4</sub> = OAc  | OC12C3(OC(C)=O)C(OC(C4=CC=CC=C4)=O)C(C2)(C)C(C([H])C(OC)=O)C1(C)C56                                                         |

|    |                                                 |          |          |                                                                                                                             |                                                                                                                                               |       |
|----|-------------------------------------------------|----------|----------|-----------------------------------------------------------------------------------------------------------------------------|-----------------------------------------------------------------------------------------------------------------------------------------------|-------|
|    |                                                 |          |          |                                                                                                                             | <chem>C(C(C7(C)C(OC(C)=O)C6)=CC(OC7C8=COC=C8)=O)(O9)C3OC9(CC)O5</chem>                                                                        |       |
| 31 | C <sub>41</sub> H <sub>48</sub> O <sub>17</sub> | 812.2892 | 813.2970 | R = OAc, R <sub>1</sub> = Tg, R <sub>2</sub> = OAc, R <sub>3</sub> = CH <sub>2</sub> CH <sub>3</sub> , R <sub>4</sub> = OAc | <chem>OC12C3(OC(C)=O)C(OC(/C(C)=C/C)=O)C(C2)(C)C(C(OC(C)=O)C(OC)=O)C1(C)C45C(C(C6(C)C(OC(C)=O)C5)=CC(OC6C7=COC=C7)=O)(O8)C3OC8(CC)O4</chem>   |       |
| 32 | C <sub>43</sub> H <sub>46</sub> O <sub>17</sub> | 834.2735 | 835.2813 | R = OAc, R <sub>1</sub> = Bz, R <sub>2</sub> = OAc, R <sub>3</sub> = CH <sub>2</sub> CH <sub>3</sub> , R <sub>4</sub> = OAc | <chem>OC12C3(OC(C)=O)C(OC(C4=CC=CC=C4)=O)C(C2)(C)C(C(OC(C)=O)C(OC)=O)C1(C)C56C(C(C7(C)C(OC(C)=O)C6)=CC(OC7C8=COC=C8)=O)(O9)C3OC9(CC)O5</chem> |       |
| 33 | C <sub>36</sub> H <sub>44</sub> O <sub>12</sub> | 668.2833 | 669.2911 | R = H, R <sub>1</sub> = Tg, R <sub>2</sub> = OH, R <sub>3</sub> = CH(CH <sub>3</sub> ) <sub>2</sub> , R <sub>4</sub> = H    | <chem>OC12C3(O)C(OC(/C(C)=C/C)=O)C(C2)(C)C(C([H])C(OC)=O)C1(C)C45C(C(C6(C)C([H])C5)=CC(OC6C7=COC=C7)=O)(O8)C3OC8(C(C)C)O4</chem>              | [1]   |
| 34 | C <sub>38</sub> H <sub>42</sub> O <sub>12</sub> | 690.2676 | 691.2755 | R = H, R <sub>1</sub> = Bz, R <sub>2</sub> = OH, R <sub>3</sub> = CH(CH <sub>3</sub> ) <sub>2</sub> , R <sub>4</sub> = H    | <chem>OC12C3(O)C(OC(C4=CC=CC=C4)=O)C(C2)(C)C(C([H])C(OC)=O)C1(C)C56C(C(C7(C)C([H])C6)=CC(OC7C8=COC=C8)=O)(O9)C3OC9(C(C)C)O5</chem>            |       |
| 35 | C <sub>38</sub> H <sub>46</sub> O <sub>14</sub> | 726.2888 | 727.2966 | R = OAc, R <sub>1</sub> = Tg, R <sub>2</sub> = OH, R <sub>3</sub> = CH(CH <sub>3</sub> ) <sub>2</sub> , R <sub>4</sub> = H  | <chem>OC12C3(O)C(OC(/C(C)=C/C)=O)C(C2)(C)C(C(OC(C)=O)C(OC)=O)C1(C)C45C(C(C6(C)C([H])C5)=CC(OC6C7=COC=C7)=O)(O8)C3OC8(C(C)C)O4</chem>          | [2,6] |

|    |                                                 |          |          |                                                                                                                             |                                                                                                                             |       |
|----|-------------------------------------------------|----------|----------|-----------------------------------------------------------------------------------------------------------------------------|-----------------------------------------------------------------------------------------------------------------------------|-------|
| 36 | C <sub>40</sub> H <sub>44</sub> O <sub>14</sub> | 748.2731 | 749.2809 | R = OAc. R <sub>1</sub> = Bz. R <sub>2</sub> = OH. R <sub>3</sub> = CH(CH <sub>3</sub> ) <sub>2</sub> . R <sub>4</sub> = H  | OC12C3(O)C(OC(C4=CC=CC=C4)=O)C(C2)(C)C(C(OC(C)=O)C(OC)=O)C1(C)C56C(C(C7(C)C([H])C6)=CC(OC7C8=COC=C8)=O)(O9)C3OC9(C(C)C)O5   | [2]   |
| 37 | C <sub>38</sub> H <sub>46</sub> O <sub>13</sub> | 710.2938 | 711.3017 | R = H. R <sub>1</sub> = Tg. R <sub>2</sub> = OAc. R <sub>3</sub> = CH(CH <sub>3</sub> ) <sub>2</sub> . R <sub>4</sub> = H   | OC12C3(OC(C)=O)C(OC(/C(C)=C/C)=O)C(C2)(C)C(C([H])C(OC)=O)C1(C)C45C(C(C6(C)C([H])C5)=CC(OC6C7=COC=C7)=O)(O8)C3OC8(C(C)C)O4   | [1]   |
| 38 | C <sub>40</sub> H <sub>44</sub> O <sub>13</sub> | 732.2782 | 733.2860 | R = H. R <sub>1</sub> = Bz. R <sub>2</sub> = OAc. R <sub>3</sub> = CH(CH <sub>3</sub> ) <sub>2</sub> . R <sub>4</sub> = H   | OC12C3(OC(C)=O)C(OC(C4=CC=CC=C4)=O)C(C2)(C)C(C([H])C(OC)=O)C1(C)C56C(C(C7(C)C([H])C6)=CC(OC7C8=COC=C8)=O)(O9)C3OC9(C(C)C)O5 |       |
| 39 | C <sub>38</sub> H <sub>46</sub> O <sub>14</sub> | 726.2888 | 727.2966 | R = H. R <sub>1</sub> = Tg. R <sub>2</sub> = OH. R <sub>3</sub> = CH(CH <sub>3</sub> ) <sub>2</sub> . R <sub>4</sub> = OAc  | OC12C3(O)C(OC(/C(C)=C/C)=O)C(C2)(C)C(C([H])C(OC)=O)C1(C)C45C(C(C6(C)C(OC(C)=O)C5)=CC(OC6C7=COC=C7)=O)(O8)C3OC8(C(C)C)O4     | [2,7] |
| 40 | C <sub>40</sub> H <sub>44</sub> O <sub>14</sub> | 748.2731 | 749.2809 | R = H. R <sub>1</sub> = Bz. R <sub>2</sub> = OH. R <sub>3</sub> = CH(CH <sub>3</sub> ) <sub>2</sub> . R <sub>4</sub> = OAc  | OC12C3(O)C(OC(C4=CC=CC=C4)=O)C(C2)(C)C(C([H])C(OC)=O)C1(C)C56C(C(C7(C)C(OC(C)=O)C6)=CC(OC7C8=COC=C8)=O)(O9)C3OC9(C(C)C)O5   | [2,7] |
| 41 | C <sub>40</sub> H <sub>48</sub> O <sub>15</sub> | 768.2998 | 769.3071 | R = OAc. R <sub>1</sub> = Tg. R <sub>2</sub> = OAc. R <sub>3</sub> = CH(CH <sub>3</sub> ) <sub>2</sub> . R <sub>4</sub> = H | OC12C3(OC(C)=O)C(OC(/C(C)=C/C)=O)C(C2)(C)C(C(OC(C)=O)C(OC)=O)C1(C)C                                                         |       |

|    |                                                 |          |          |                                                                                                                              |                                                                                                                                |
|----|-------------------------------------------------|----------|----------|------------------------------------------------------------------------------------------------------------------------------|--------------------------------------------------------------------------------------------------------------------------------|
|    |                                                 |          |          |                                                                                                                              | 45C(C(C6(C)C([H])C5)=CC(OC6C7=COC=C7)=O)(O8)C3OC8(C(C)C)O4                                                                     |
| 42 | C <sub>42</sub> H <sub>46</sub> O <sub>15</sub> | 790.2837 | 791.2915 | R = OAc. R <sub>1</sub> = Bz. R <sub>2</sub> = OAc. R <sub>3</sub> = CH(CH <sub>3</sub> ) <sub>2</sub> . R <sub>4</sub> = H  | OC12C3(OC(C)=O)C(OC(C4=CC=CC=C4)=O)C(C2)(C)C(C(OC(C)=O)C(OC)=O)C1(C)C56C(C(C7(C)C([H])C6)=CC(OC7C8=CO=C8)=O)(O9)C3OC9(C(C)C)O5 |
| 43 | C <sub>40</sub> H <sub>48</sub> O <sub>16</sub> | 784.2942 | 785.3021 | R = OAc. R <sub>1</sub> = Tg. R <sub>2</sub> = OH. R <sub>3</sub> = CH(CH <sub>3</sub> ) <sub>2</sub> . R <sub>4</sub> = OAc | OC12C3(O)C(OC(/C(C)=C/C)=O)C(C2)(C)C(C(OC(C)=O)C(OC)=O)C1(C)C45C(C(C6(C)C(OC(C)=O)C5)=CC(OC6C7=COC=C7)=O)(O8)C3OC8(C(C)C)O4    |
| 44 | C <sub>42</sub> H <sub>46</sub> O <sub>16</sub> | 806.2786 | 807.2864 | R = OAc. R <sub>1</sub> = Bz. R <sub>2</sub> = OH. R <sub>3</sub> = CH(CH <sub>3</sub> ) <sub>2</sub> . R <sub>4</sub> = OAc | OC12C3(O)C(OC(C4=CC=CC=C4)=O)C(C2)(C)C(C(OC(C)=O)C(OC)=O)C1(C)C56C(C(C7(C)C(OC(C)=O)C6)=CC(OC7C8=CO=C8)=O)(O9)C3OC9(C(C)C)O5   |
| 45 | C <sub>40</sub> H <sub>48</sub> O <sub>15</sub> | 768.2993 | 769.3071 | R = H. R <sub>1</sub> = Tg. R <sub>2</sub> = OAc. R <sub>3</sub> = CH(CH <sub>3</sub> ) <sub>2</sub> . R <sub>4</sub> = OAc  | OC12C3(OC(C)=O)C(OC(/C(C)=C/C)=O)C(C2)(C)C(C([H])C(OC)=O)C1(C)C45C(C(C6(C)C(OC(C)=O)C5)=CC(OC6C7=COC=C7)=O)(O8)C3OC8(C(C)C)O4  |
| 46 | C <sub>42</sub> H <sub>46</sub> O <sub>15</sub> | 790.2837 | 791.2915 | R = H. R <sub>1</sub> = Bz. R <sub>2</sub> = OAc. R <sub>3</sub> = CH(CH <sub>3</sub> ) <sub>2</sub> . R <sub>4</sub> = OAc  | OC12C3(OC(C)=O)C(OC(C4=CC=CC=C4)=O)C(C2)(C)C(C([H])C(OC)=O)C1(C)C56C(C(C7(C)C(OC(C)=O)C6)=CC(OC7C8=CO=C8)=O)(O9)C3OC9(C(C)C)O5 |

|    |                                                 |          |          |                                                                                                                                            |                                                                                                                                     |       |
|----|-------------------------------------------------|----------|----------|--------------------------------------------------------------------------------------------------------------------------------------------|-------------------------------------------------------------------------------------------------------------------------------------|-------|
| 47 | C <sub>42</sub> H <sub>50</sub> O <sub>17</sub> | 826.3048 | 827.3126 | R = OAc. R <sub>1</sub> = Tg. R <sub>2</sub> = OAc. R <sub>3</sub> = CH(CH <sub>3</sub> ) <sub>2</sub> . R <sub>4</sub> = OAc              | OC12C3(OC(C)=O)C(OC(/C(C)=C/C)=O)C(C2)(C)C(C(OC(C)=O)C(OC)=O)C1(C)C45C(C(C6(C)C(OC(C)=O)C5)=CC(OC6C7=COC=C7)=O)(O8)C3OC8(C(C)C)O4   |       |
| 48 | C <sub>44</sub> H <sub>48</sub> O <sub>17</sub> | 848.2892 | 849.2970 | R = OAc. R <sub>1</sub> = Bz. R <sub>2</sub> = OAc. R <sub>3</sub> = CH(CH <sub>3</sub> ) <sub>2</sub> . R <sub>4</sub> = OAc              | OC12C3(OC(C)=O)C(OC(C4=CC=CC=C4)=O)C(C2)(C)C(C(OC(C)=O)C(OC)=O)C1(C)C56C(C(C7(C)C(OC(C)=O)C6)=CC(OC7C8=COC=C8)=O)(O9)C3OC9(C(C)C)O5 |       |
| 49 | C <sub>37</sub> H <sub>46</sub> O <sub>12</sub> | 682.2989 | 683.3068 | R = H. R <sub>1</sub> = Tg. R <sub>2</sub> = OH. R <sub>3</sub> = CH <sub>3</sub> CHCH <sub>2</sub> CH <sub>3</sub> . R <sub>4</sub> = H   | OC12C3(O)C(OC(/C(C)=C/C)=O)C(C2)(C)C(C([H])C(OC)=O)C1(C)C45C(C(C6(C)C([H])C5)=CC(OC6C7=COC=C7)=O)(O8)C3OC8(C(C)CC)O4                | [8]   |
| 50 | C <sub>39</sub> H <sub>44</sub> O <sub>12</sub> | 704.2833 | 705.2911 | R = H. R <sub>1</sub> = Bz. R <sub>2</sub> = OH. R <sub>3</sub> = CH <sub>3</sub> CHCH <sub>2</sub> CH <sub>3</sub> . R <sub>4</sub> = H   | OC12C3(O)C(OC(C4=CC=CC=C4)=O)C(C2)(C)C(C([H])C(OC)=O)C1(C)C56C(C(C7(C)C([H])C6)=CC(OC7C8=COC=C8)=O)(O9)C3OC9(C(C)CC)O5              |       |
| 51 | C <sub>39</sub> H <sub>48</sub> O <sub>14</sub> | 740.3044 | 741.3122 | R = OAc. R <sub>1</sub> = Tg. R <sub>2</sub> = OH. R <sub>3</sub> = CH <sub>3</sub> CHCH <sub>2</sub> CH <sub>3</sub> . R <sub>4</sub> = H | OC12C3(O)C(OC(/C(C)=C/C)=O)C(C2)(C)C(C(OC(C)=O)C(OC)=O)C1(C)C45C(C(C6(C)C([H])C5)=CC(OC6C7=COC=C7)=O)(O8)C3OC8(C(C)CC)O4            | [2,7] |
| 52 | C <sub>41</sub> H <sub>46</sub> O <sub>14</sub> | 762.2888 | 763.2966 | R = OAc. R <sub>1</sub> = Bz. R <sub>2</sub> = OH. R <sub>3</sub> = CH <sub>3</sub> CHCH <sub>2</sub> CH <sub>3</sub> . R <sub>4</sub> = H | OC12C3(O)C(OC(C4=CC=CC=C4)=O)C(C2)(C)C(C(OC(C)=O)C(OC)=O)C1(C)C56C(C                                                                | [2,7] |

|    |                                                 |          |          |                                                                                                                                             |  |                                                                                                                                             |         |
|----|-------------------------------------------------|----------|----------|---------------------------------------------------------------------------------------------------------------------------------------------|--|---------------------------------------------------------------------------------------------------------------------------------------------|---------|
|    |                                                 |          |          |                                                                                                                                             |  | <chem>C(C7(C)C([H])C6)=CC(OC7C8=COC=C8)=O)(O9)C3OC9(C(C)CC)O5</chem>                                                                        |         |
| 53 | C <sub>39</sub> H <sub>48</sub> O <sub>13</sub> | 724.3095 | 725.3173 | R = H. R <sub>1</sub> = Tg. R <sub>2</sub> = OAc. R <sub>3</sub> = CH <sub>3</sub> CHCH <sub>2</sub> CH <sub>3</sub> . R <sub>4</sub> = H   |  | <chem>OC12C3(OC(C)=O)C(OC(/C(C)=C/C)=O)C(C2)(C)C(C([H])C(OC)=O)C1(C)C45C(C(C6(C)C([H])C5)=CC(OC6C7=COC=C7)=O)(O8)C3OC8(C(C)CC)O4</chem>     | [1]     |
| 54 | C <sub>41</sub> H <sub>46</sub> O <sub>13</sub> | 746.2938 | 747.3017 | R = H. R <sub>1</sub> = Bz. R <sub>2</sub> = OAc. R <sub>3</sub> = CH <sub>3</sub> CHCH <sub>2</sub> CH <sub>3</sub> . R <sub>4</sub> = H   |  | <chem>OC12C3(OC(C)=O)C(OC(C4=CC=CC=C4)=O)C(C2)(C)C(C([H])C(OC)=O)C1(C)C56C(C(C7(C)C([H])C6)=CC(OC7C8=COC=C8)=O)(O9)C3OC9(C(C)CC)O5</chem>   |         |
| 55 | C <sub>39</sub> H <sub>48</sub> O <sub>14</sub> | 740.3044 | 741.3122 | R = H. R <sub>1</sub> = Tg. R <sub>2</sub> = OH. R <sub>3</sub> = CH <sub>3</sub> CHCH <sub>2</sub> CH <sub>3</sub> . R <sub>4</sub> = OAc  |  | <chem>OC12C3(O)C(OC(/C(C)=C/C)=O)C(C2)(C)C(C([H])C(OC)=O)C1(C)C45C(C(C6(C)C(OC(C)=O)C5)=CC(OC6C7=COC=C7)=O)(O8)C3OC8(C(C)CC)O4</chem>       | [2,7,8] |
| 56 | C <sub>41</sub> H <sub>46</sub> O <sub>14</sub> | 762.2888 | 763.2966 | R = H. R <sub>1</sub> = Bz. R <sub>2</sub> = OH. R <sub>3</sub> = CH <sub>3</sub> CHCH <sub>2</sub> CH <sub>3</sub> . R <sub>4</sub> = OAc  |  | <chem>OC12C3(O)C(OC(C4=CC=CC=C4)=O)C(C2)(C)C(C([H])C(OC)=O)C1(C)C56C(C(C7(C)C(OC(C)=O)C6)=CC(OC7C8=COC=C8)=O)(O9)C3OC9(C(C)CC)O5</chem>     | [2,7]   |
| 57 | C <sub>41</sub> H <sub>50</sub> O <sub>15</sub> | 782.3150 | 783.3228 | R = OAc. R <sub>1</sub> = Tg. R <sub>2</sub> = OAc. R <sub>3</sub> = CH <sub>3</sub> CHCH <sub>2</sub> CH <sub>3</sub> . R <sub>4</sub> = H |  | <chem>OC12C3(OC(C)=O)C(OC(/C(C)=C/C)=O)C(C2)(C)C(C(OC(C)=O)C(OC)=O)C1(C)C45C(C(C6(C)C([H])C5)=CC(OC6C7=COC=C7)=O)(O8)C3OC8(C(C)CC)O4</chem> |         |



|    |                                                 |          |          |                                                                                                                                                  |                                                                                                                                 |
|----|-------------------------------------------------|----------|----------|--------------------------------------------------------------------------------------------------------------------------------------------------|---------------------------------------------------------------------------------------------------------------------------------|
| 58 | C <sub>43</sub> H <sub>48</sub> O <sub>15</sub> | 804.2993 | 805.3071 | R = OAc. R <sub>1</sub> = Bz. R <sub>2</sub> = OAc. R <sub>3</sub> = CH <sub>3</sub> CHCH <sub>2</sub> CH <sub>3</sub> .<br>R <sub>4</sub> = H   | OC12C3(OC(C)=O)C(OC(C4=CC=CC=C4)=O)C(C2)(C)C(C(OC(C)=O)C(OC)=O)C1(C)C56C(C(C7(C)C([H])C6)=CC(OC7C8=CO=C8)=O)(O9)C3OC9(C(C)CC)O5 |
| 59 | C <sub>41</sub> H <sub>50</sub> O <sub>16</sub> | 798.3099 | 799.3177 | R = OAc. R <sub>1</sub> = Tg. R <sub>2</sub> = OH. R <sub>3</sub> = CH <sub>3</sub> CHCH <sub>2</sub> CH <sub>3</sub> . R <sub>4</sub> = OAc     | OC12C3(O)C(OC(/C(C)=C/C)=O)C(C2)(C)C(C(OC(C)=O)C(OC)=O)C1(C)C45C(C(C6(C)C(OC(C)=O)C5)=CC(OC6C7=CO=C7)=O)(O8)C3OC8(C(C)CC)O4     |
| 60 | C <sub>43</sub> H <sub>48</sub> O <sub>16</sub> | 820.2942 | 821.3021 | R = OAc. R <sub>1</sub> = Bz. R <sub>2</sub> = OH. R <sub>3</sub> = CH <sub>3</sub> CHCH <sub>2</sub> CH <sub>3</sub> . R <sub>4</sub> = OAc     | OC12C3(O)C(OC(C4=CC=CC=C4)=O)C(C2)(C)C(C(OC(C)=O)C(OC)=O)C1(C)C56C(C(C7(C)C(OC(C)=O)C6)=CC(OC7C8=CO=C8)=O)(O9)C3OC9(C(C)CC)O5   |
| 61 | C <sub>41</sub> H <sub>50</sub> O <sub>15</sub> | 782.3150 | 783.3228 | R = H. R <sub>1</sub> = Tg. R <sub>2</sub> = OAc. R <sub>3</sub> = CH <sub>3</sub> CHCH <sub>2</sub> CH <sub>3</sub> . R <sub>4</sub> = OAc      | OC12C3(OC(C)=O)C(OC(/C(C)=C/C)=O)C(C2)(C)C(C([H])C(OC)=O)C1(C)C45C(C(C6(C)C(OC(C)=O)C5)=CC(OC6C7=CO=C7)=O)(O8)C3OC8(C(C)CC)O4   |
| 62 | C <sub>43</sub> H <sub>48</sub> O <sub>15</sub> | 804.2993 | 805.3071 | R = H. R <sub>1</sub> = Bz. R <sub>2</sub> = OAc. R <sub>3</sub> = CH <sub>3</sub> CHCH <sub>2</sub> CH <sub>3</sub> . R <sub>4</sub> = OAc      | OC12C3(OC(C)=O)C(OC(C4=CC=CC=C4)=O)C(C2)(C)C(C([H])C(OC)=O)C1(C)C56C(C(C7(C)C(OC(C)=O)C6)=CC(OC7C8=CO=C8)=O)(O9)C3OC9(C(C)CC)O5 |
| 63 | C <sub>43</sub> H <sub>52</sub> O <sub>17</sub> | 840.3205 | 841.3283 | R = OAc. R <sub>1</sub> = Tg. R <sub>2</sub> = OAc. R <sub>3</sub> = CH <sub>3</sub> CHCH <sub>2</sub> CH <sub>3</sub> .<br>R <sub>4</sub> = OAc | OC12C3(OC(C)=O)C(OC(/C(C)=C/C)=O)C(C2)(C)C(C(OC(C)=O)C(OC)=O)C1(C)C                                                             |

|    |                                                 |          |          |                                                                                                                                                  |                                                                                                                                      |
|----|-------------------------------------------------|----------|----------|--------------------------------------------------------------------------------------------------------------------------------------------------|--------------------------------------------------------------------------------------------------------------------------------------|
|    |                                                 |          |          |                                                                                                                                                  | 45C(C(C6(C)C(OC(C)=O)C5)=CC(OC6C7=COC=C7)=O)(O8)C3OC8(C(C)CC)O4                                                                      |
| 64 | C <sub>45</sub> H <sub>50</sub> O <sub>17</sub> | 862.3048 | 863.3126 | R = OAc. R <sub>1</sub> = Bz. R <sub>2</sub> = OAc. R <sub>3</sub> = CH <sub>3</sub> CHCH <sub>2</sub> CH <sub>3</sub> .<br>R <sub>4</sub> = OAc | OC12C3(OC(C)=O)C(OC(C4=CC=CC=C4)=O)C(C2)(C)C(C(OC(C)=O)C(OC)=O)C1(C)C56C(C(C7(C)C(OC(C)=O)C6)=CC(OC7C8=COC=C8)=O)(O9)C3OC9(C(C)CC)O5 |
| 65 | C <sub>37</sub> H <sub>44</sub> O <sub>12</sub> | 680.2833 | 681.2911 | R = H. R <sub>1</sub> = Tg. R <sub>2</sub> = OH. R <sub>3</sub> = (E)-CH <sub>3</sub> C=CHCH <sub>3</sub> . R <sub>4</sub> = H                   | OC12C3(O)C(OC(/C(C)=C/C)=O)C(C2)(C)C(C([H]))C(OC)=O)C1(C)C45C(C(C6(C)C([H]))C5)=CC(OC6C7=COC=C7)=O)(O8)C3OC8(/C(C)=C/C)O4            |
| 66 | C <sub>39</sub> H <sub>42</sub> O <sub>12</sub> | 702.2676 | 703.2755 | R = H. R <sub>1</sub> = Bz. R <sub>2</sub> = OH. R <sub>3</sub> = (E)-CH <sub>3</sub> C=CHCH <sub>3</sub> . R <sub>4</sub> = H                   | OC12C3(O)C(OC(C4=CC=CC=C4)=O)C(C2)(C)C(C(C([H]))C(OC)=O)C1(C)C56C(C(C7(C)C([H]))C6)=CC(OC7C8=COC=C8)=O)(O9)C3OC9(/C(C)=C/C)O5        |
| 67 | C <sub>39</sub> H <sub>46</sub> O <sub>14</sub> | 738.2888 | 739.2966 | R = OAc. R <sub>1</sub> = Tg. R <sub>2</sub> = OH. R <sub>3</sub> = (E)-CH <sub>3</sub> C=CHCH <sub>3</sub> .<br>R <sub>4</sub> = H              | OC12C3(O)C(OC(/C(C)=C/C)=O)C(C2)(C)C(C(OC(C)=O)C(OC)=O)C1(C)C45C(C(C6(C)C([H]))C5)=CC(OC6C7=COC=C7)=O)(O8)C3OC8(/C(C)=C/C)O4         |
| 68 | C <sub>41</sub> H <sub>44</sub> O <sub>14</sub> | 760.2731 | 761.2809 | R = OAc. R <sub>1</sub> = Bz. R <sub>2</sub> = OH. R <sub>3</sub> = (E)-CH <sub>3</sub> C=CHCH <sub>3</sub> .<br>R <sub>4</sub> = H              | OC12C3(O)C(OC(C4=CC=CC=C4)=O)C(C2)(C)C(C(OC(C)=O)C(OC)=O)C1(C)C56C(C(C7(C)C([H]))C6)=CC(OC7C8=COC=C8)=O)(O9)C3OC9(/C(C)=C/C)O5       |

[2]

|    |                                                 |          |          |                                                                                                                                   |                                                                                                                                   |
|----|-------------------------------------------------|----------|----------|-----------------------------------------------------------------------------------------------------------------------------------|-----------------------------------------------------------------------------------------------------------------------------------|
| 69 | C <sub>39</sub> H <sub>46</sub> O <sub>13</sub> | 722.2938 | 723.3017 | R = H. R <sub>1</sub> = Tg. R <sub>2</sub> = OAc. R <sub>3</sub> = (E)-CH <sub>3</sub> C=CHCH <sub>3</sub> . R <sub>4</sub> = H   | OC12C3(OC(C)=O)C(OC(/C(C)=C/C)=O)C(C2)(C)C(C([H])C(OC)=O)C1(C)C45C(C(C6(C)C([H])C5)=CC(OC6C7=COC=C7)=O)(O8)C3OC8(/C(C)=C/C)O4     |
| 70 | C <sub>41</sub> H <sub>44</sub> O <sub>13</sub> | 744.2782 | 745.2860 | R = H. R <sub>1</sub> = Bz. R <sub>2</sub> = OAc. R <sub>3</sub> = (E)-CH <sub>3</sub> C=CHCH <sub>3</sub> . R <sub>4</sub> = H   | OC12C3(OC(C)=O)C(OC(C4=CC=CC=C4)=O)C(C2)(C)C(C([H])C(OC)=O)C1(C)C56C(C(C7(C)C([H])C6)=CC(OC7C8=COC=C8)=O)(O9)C3OC9(/C(C)=C/C)O5   |
| 71 | C <sub>39</sub> H <sub>46</sub> O <sub>14</sub> | 738.2888 | 739.2966 | R = H. R <sub>1</sub> = Tg. R <sub>2</sub> = OH. R <sub>3</sub> = (E)-CH <sub>3</sub> C=CHCH <sub>3</sub> . R <sub>4</sub> = OAc  | OC12C3(O)C(OC(/C(C)=C/C)=O)C(C2)(C)C(C([H])C(OC)=O)C1(C)C45C(C(C6(C)C(OC(C)=O)C5)=CC(OC6C7=COC=C7)=O)(O8)C3OC8(/C(C)=C/C)O4       |
| 72 | C <sub>41</sub> H <sub>44</sub> O <sub>14</sub> | 760.2731 | 761.2809 | R = H. R <sub>1</sub> = Bz. R <sub>2</sub> = OH. R <sub>3</sub> = (E)-CH <sub>3</sub> C=CHCH <sub>3</sub> . R <sub>4</sub> = OAc  | OC12C3(O)C(OC(C4=CC=CC=C4)=O)C(C2)(C)C(C([H])C(OC)=O)C1(C)C56C(C(C7(C)C(OC(C)=O)C6)=CC(OC7C8=COC=C8)=O)(O9)C3OC9(/C(C)=C/C)O5     |
| 73 | C <sub>41</sub> H <sub>48</sub> O <sub>15</sub> | 780.2993 | 781.3071 | R = OAc. R <sub>1</sub> = Tg. R <sub>2</sub> = OAc. R <sub>3</sub> = (E)-CH <sub>3</sub> C=CHCH <sub>3</sub> . R <sub>4</sub> = H | OC12C3(OC(C)=O)C(OC(/C(C)=C/C)=O)C(C2)(C)C(C(OC(C)=O)C(OC)=O)C1(C)C45C(C(C6(C)C([H])C5)=CC(OC6C7=COC=C7)=O)(O8)C3OC8(/C(C)=C/C)O4 |
| 74 | C <sub>43</sub> H <sub>46</sub> O <sub>15</sub> | 802.2837 | 803.2915 | R = OAc. R <sub>1</sub> = Bz. R <sub>2</sub> = OAc. R <sub>3</sub> = (E)-CH <sub>3</sub> C=CHCH <sub>3</sub> . R <sub>4</sub> = H | OC12C3(OC(C)=O)C(OC(C4=CC=CC=C4)=O)C(C2)(C)C(C(OC(C)=O)C(OC)=O)C1(C                                                               |

[2]

|    |                                                 |          |          |                                                                                                                                        |  |                                                                                                                                                    |
|----|-------------------------------------------------|----------|----------|----------------------------------------------------------------------------------------------------------------------------------------|--|----------------------------------------------------------------------------------------------------------------------------------------------------|
|    |                                                 |          |          |                                                                                                                                        |  | <chem>C)C56C(C(C7(C)C([H])C6)=CC(OC7C8=COC=C8)=O)(O9)C3OC9(/C(C)=C/C)O5</chem>                                                                     |
| 75 | C <sub>41</sub> H <sub>48</sub> O <sub>16</sub> | 796.2942 | 797.3021 | R = OAc. R <sub>1</sub> = Tg. R <sub>2</sub> = OH. R <sub>3</sub> = (E)-CH <sub>3</sub> C=CHCH <sub>3</sub> .<br>R <sub>4</sub> = OAc  |  | <chem>OC12C3(O)C(OC(/C(C)=C/C)=O)C(C2)(C)C(C(OC(C)=O)C(OC)=O)C1(C)C45C(C(C6(C)C(OC(C)=O)C5)=CC(OC6C7=COC=C7)=O)(O8)C3OC8(/C(C)=C/C)O4</chem>       |
| 76 | C <sub>43</sub> H <sub>46</sub> O <sub>16</sub> | 818.2786 | 819.2864 | R = OAc. R <sub>1</sub> = Bz. R <sub>2</sub> = OH. R <sub>3</sub> = (E)-CH <sub>3</sub> C=CHCH <sub>3</sub> .<br>R <sub>4</sub> = OAc  |  | <chem>OC12C3(O)C(OC(C4=CC=CC=C4)=O)C(C2)(C)C(C(OC(C)=O)C(OC)=O)C1(C)C56C(C(C7(C)C(OC(C)=O)C6)=CC(OC7C8=CO C=C8)=O)(O9)C3OC9(/C(C)=C/C)O5</chem>    |
| 77 | C <sub>41</sub> H <sub>48</sub> O <sub>15</sub> | 780.2993 | 781.3071 | R = H. R <sub>1</sub> = Tg. R <sub>2</sub> = OAc. R <sub>3</sub> = (E)-CH <sub>3</sub> C=CHCH <sub>3</sub> . R <sub>4</sub> = OAc      |  | <chem>OC12C3(OC(C)=O)C(OC(/C(C)=C/C)=O)C(C2)(C)C(C([H])C(OC)=O)C1(C)C45C(C(C6(C)C(OC(C)=O)C5)=CC(OC6C7=COC=C7)=O)(O8)C3OC8(/C(C)=C/C)O4</chem>     |
| 78 | C <sub>43</sub> H <sub>46</sub> O <sub>15</sub> | 802.2837 | 803.2915 | R = H. R <sub>1</sub> = Bz. R <sub>2</sub> = OAc. R <sub>3</sub> = (E)-CH <sub>3</sub> C=CHCH <sub>3</sub> . R <sub>4</sub> = OAc      |  | <chem>OC12C3(OC(C)=O)C(OC(C4=CC=CC=C4)=O)C(C2)(C)C(C([H])C(OC)=O)C1(C)C56C(C(C7(C)C(OC(C)=O)C6)=CC(OC7C8=COC=C8)=O)(O9)C3OC9(/C(C)=C/C)O5</chem>   |
| 79 | C <sub>43</sub> H <sub>50</sub> O <sub>17</sub> | 838.3048 | 839.3126 | R = OAc. R <sub>1</sub> = Tg. R <sub>2</sub> = OAc. R <sub>3</sub> = (E)-CH <sub>3</sub> C=CHCH <sub>3</sub> .<br>R <sub>4</sub> = OAc |  | <chem>OC12C3(OC(C)=O)C(OC(/C(C)=C/C)=O)C(C2)(C)C(C(OC(C)=O)C(OC)=O)C1(C)C45C(C(C6(C)C(OC(C)=O)C5)=CC(OC6C7=COC=C7)=O)(O8)C3OC8(/C(C)=C/C)O4</chem> |

|    |                                                 |          |          |                                                                                                                                        |                                                                                                                                         |       |
|----|-------------------------------------------------|----------|----------|----------------------------------------------------------------------------------------------------------------------------------------|-----------------------------------------------------------------------------------------------------------------------------------------|-------|
| 80 | C <sub>45</sub> H <sub>48</sub> O <sub>17</sub> | 860.2892 | 861.2970 | R = OAc. R <sub>1</sub> = Bz. R <sub>2</sub> = OAc. R <sub>3</sub> = (E)-CH <sub>3</sub> C=CHCH <sub>3</sub> .<br>R <sub>4</sub> = OAc | OC12C3(OC(C)=O)C(OC(C4=CC=CC=C4)=O)C(C2)(C)C(C(OC(C)=O)C(OC)=O)C1(C)C56C(C(C7(C)C(OC(C)=O)C6)=CC(OC7C8=COC=C8)=O)(O9)C3OC9(/C(C)=C/C)O5 |       |
| 81 | C <sub>34</sub> H <sub>40</sub> O <sub>13</sub> | 656.2469 | 657.2547 | R = H. R <sub>1</sub> = Tg. R <sub>2</sub> = OH. R <sub>3</sub> = CH <sub>3</sub> . R <sub>4</sub> = OH                                | OC12C3(O)C(OC(/C(C)=C/C)=O)C(C2)(C)C(C([H])C(OC)=O)C1(C)C45C(C(C6(C)C(O)C5)=CC(OC6C7=COC=C7)=O)(O8)C3OC8(C)O4                           | [9,1] |
| 82 | C <sub>36</sub> H <sub>38</sub> O <sub>13</sub> | 678.2312 | 679.2391 | R = H. R <sub>1</sub> = Bz. R <sub>2</sub> = OH. R <sub>3</sub> = CH <sub>3</sub> . R <sub>4</sub> = OH                                | OC12C3(O)C(OC(C4=CC=CC=C4)=O)C(C2)(C)C(C([H])C(OC)=O)C1(C)C56C(C(C7(C)C(O)C6)=CC(OC7C8=COC=C8)=O)(O9)C3OC9(C)O5                         |       |
| 83 | C <sub>36</sub> H <sub>42</sub> O <sub>15</sub> | 714.2524 | 715.2602 | R = OAc. R <sub>1</sub> = Tg. R <sub>2</sub> = OH. R <sub>3</sub> = CH <sub>3</sub> . R <sub>4</sub> = OH                              | OC12C3(O)C(OC(/C(C)=C/C)=O)C(C2)(C)C(C(OC(C)=O)C(OC)=O)C1(C)C45C(C(C6(C)C(O)C5)=CC(OC6C7=COC=C7)=O)(O8)C3OC8(C)O4                       |       |
| 84 | C <sub>38</sub> H <sub>40</sub> O <sub>15</sub> | 736.2367 | 737.2445 | R = OAc. R <sub>1</sub> = Bz. R <sub>2</sub> = OH. R <sub>3</sub> = CH <sub>3</sub> . R <sub>4</sub> = OH                              | OC12C3(O)C(OC(C4=CC=CC=C4)=O)C(C2)(C)C(C(OC(C)=O)C(OC)=O)C1(C)C56C(C(C7(C)C(O)C6)=CC(OC7C8=COC=C8)=O)(O9)C3OC9(C)O5                     |       |
| 85 | C <sub>36</sub> H <sub>42</sub> O <sub>14</sub> | 698.2575 | 699.2653 | R = H. R <sub>1</sub> = Tg. R <sub>2</sub> = OAc. R <sub>3</sub> = CH <sub>3</sub> . R <sub>4</sub> = OH                               | OC12C3(OC(C)=O)C(OC(/C(C)=C/C)=O)C(C2)(C)C(C([H])C(OC)=O)C1(C)C45C(C                                                                    |       |

|    |                        |          |          |                                                                                                                         |                                                                                                                                         |
|----|------------------------|----------|----------|-------------------------------------------------------------------------------------------------------------------------|-----------------------------------------------------------------------------------------------------------------------------------------|
|    |                        |          |          |                                                                                                                         | <chem>(C6(C)C(O)C5)=CC(OC6C7=COC=C7)=O</chem><br><chem>(O8)C3OC8(C)O4</chem>                                                            |
| 86 | <chem>C38H40O14</chem> | 720.2418 | 721.2496 | R = H, R <sub>1</sub> = Bz, R <sub>2</sub> = OAc, R <sub>3</sub> = CH <sub>3</sub> , R <sub>4</sub> = OH                | <chem>OC12C3(OC(C)=O)C(OC(C4=CC=CC=C4)=O)C(C2)(C)C(C([H])C(OC)=O)C1(C)C56C(C(C7(C)C(O)C6)=CC(OC7C8=COC=C8)=O)(O9)C3OC9(C)O5</chem>      |
| 87 | <chem>C38H44O16</chem> | 756.2629 | 757.2708 | R = OAc, R <sub>1</sub> = Tg, R <sub>2</sub> = OAc, R <sub>3</sub> = CH <sub>3</sub> , R <sub>4</sub> = OH              | <chem>OC12C3(OC(C)=O)C(OC(/C(C)=C/C)=O)C(C2)(C)C(C(OC(C)=O)C(OC)=O)C1(C)C45C(C(C6(C)C(O)C5)=CC(OC6C7=COC=C7)=O)(O8)C3OC8(C)O4</chem>    |
| 88 | <chem>C40H42O16</chem> | 778.2473 | 779.2551 | R = OAc, R <sub>1</sub> = Bz, R <sub>2</sub> = OAc, R <sub>3</sub> = CH <sub>3</sub> , R <sub>4</sub> = OH              | <chem>OC12C3(OC(C)=O)C(OC(C4=CC=CC=C4)=O)C(C2)(C)C(C(OC(C)=O)C(OC)=O)C1(C)C56C(C(C7(C)C(O)C6)=CC(OC7C8=CO=C=C8)=O)(O9)C3OC9(C)O5</chem> |
| 89 | <chem>C35H42O13</chem> | 670.2625 | 671.2704 | R = H, R <sub>1</sub> = Tg, R <sub>2</sub> = OH, R <sub>3</sub> = CH <sub>2</sub> CH <sub>3</sub> , R <sub>4</sub> = OH | <chem>OC12C3(O)C(OC(/C(C)=C/C)=O)C(C2)(C)C(C([H])C(OC)=O)C1(C)C45C(C(C6(C)C(O)C5)=CC(OC6C7=COC=C7)=O)(O8)C3OC8(CC)O4</chem>             |
| 90 | <chem>C37H40O13</chem> | 692.2469 | 693.2547 | R = H, R <sub>1</sub> = Bz, R <sub>2</sub> = OH, R <sub>3</sub> = CH <sub>2</sub> CH <sub>3</sub> , R <sub>4</sub> = OH | <chem>OC12C3(O)C(OC(C4=CC=CC=C4)=O)C(C2)(C)C(C([H])C(OC)=O)C1(C)C56C(C(C7(C)C(O)C6)=CC(OC7C8=COC=C8)=O)(O9)C3OC9(CC)O5</chem>           |

|    |                                                 |          |          |                                                                                                                            |                                                                                                                          |
|----|-------------------------------------------------|----------|----------|----------------------------------------------------------------------------------------------------------------------------|--------------------------------------------------------------------------------------------------------------------------|
| 91 | C <sub>37</sub> H <sub>44</sub> O <sub>15</sub> | 728.2680 | 729.2758 | R = OAc. R <sub>1</sub> = Tg. R <sub>2</sub> = OH. R <sub>3</sub> = CH <sub>2</sub> CH <sub>3</sub> . R <sub>4</sub> = OH  | OC12C3(O)C(OC(/C(C)=C/C)=O)C(C2)(C)C(C(OC(C)=O)C(OC)=O)C1(C)C45C(C(C6(C)C(O)C5)=CC(OC6C7=COC=C7)=O)(O8)C3OC8(CC)O4       |
| 92 | C <sub>39</sub> H <sub>42</sub> O <sub>15</sub> | 750.2524 | 751.2602 | R = OAc. R <sub>1</sub> = Bz. R <sub>2</sub> = OH. R <sub>3</sub> = CH <sub>2</sub> CH <sub>3</sub> . R <sub>4</sub> = OH  | OC12C3(O)C(OC(C4=CC=CC=C4)=O)C(C2)(C)C(C(OC(C)=O)C(OC)=O)C1(C)C56C(C(C7(C)C(O)C6)=CC(OC7C8=COC=C8)=O)(O9)C3OC9(CC)O5     |
| 93 | C <sub>37</sub> H <sub>44</sub> O <sub>14</sub> | 712.2731 | 713.2809 | R = H. R <sub>1</sub> = Tg. R <sub>2</sub> = OAc. R <sub>3</sub> = CH <sub>2</sub> CH <sub>3</sub> . R <sub>4</sub> = OH   | OC12C3(OC(C)=O)C(OC(/C(C)=C/C)=O)C(C2)(C)C(C([H]))C(OC)=O)C1(C)C45C(C(C6(C)C(O)C5)=CC(OC6C7=COC=C7)=O)(O8)C3OC8(CC)O4    |
| 94 | C <sub>39</sub> H <sub>42</sub> O <sub>14</sub> | 734.2575 | 735.2653 | R = H. R <sub>1</sub> = Bz. R <sub>2</sub> = OAc. R <sub>3</sub> = CH <sub>2</sub> CH <sub>3</sub> . R <sub>4</sub> = OH   | OC12C3(OC(C)=O)C(OC(C4=CC=CC=C4)=O)C(C2)(C)C(C([H]))C(OC)=O)C1(C)C56C(C(C7(C)C(O)C6)=CC(OC7C8=COC=C8)=O)(O9)C3OC9(CC)O5  |
| 95 | C <sub>39</sub> H <sub>46</sub> O <sub>16</sub> | 770.2786 | 771.2864 | R = OAc. R <sub>1</sub> = Tg. R <sub>2</sub> = OAc. R <sub>3</sub> = CH <sub>2</sub> CH <sub>3</sub> . R <sub>4</sub> = OH | OC12C3(OC(C)=O)C(OC(/C(C)=C/C)=O)C(C2)(C)C(C(OC(C)=O)C(OC)=O)C1(C)C45C(C(C6(C)C(O)C5)=CC(OC6C7=COC=C7)=O)(O8)C3OC8(CC)O4 |
| 96 | C <sub>41</sub> H <sub>44</sub> O <sub>16</sub> | 792.2629 | 793.2708 | R = OAc. R <sub>1</sub> = Bz. R <sub>2</sub> = OAc. R <sub>3</sub> = CH <sub>2</sub> CH <sub>3</sub> . R <sub>4</sub> = OH | OC12C3(OC(C)=O)C(OC(C4=CC=CC=C4)=O)C(C2)(C)C(C(OC(C)=O)C(OC)=O)C1(C                                                      |

[5]

|     |                                                 |          |          |                                                                                                                             |                                                                                                                                                     |
|-----|-------------------------------------------------|----------|----------|-----------------------------------------------------------------------------------------------------------------------------|-----------------------------------------------------------------------------------------------------------------------------------------------------|
|     |                                                 |          |          |                                                                                                                             | <chem>C)C56C(C(C7(C)C(O)C6)=CC(OC7C8=CO<br/>C=C8)=O)(O9)C3OC9(CC)O5</chem>                                                                          |
| 97  | C <sub>36</sub> H <sub>44</sub> O <sub>13</sub> | 684.2782 | 685.2860 | R = H. R <sub>1</sub> = Tg. R <sub>2</sub> = OH. R <sub>3</sub> = CH(CH <sub>3</sub> ) <sub>2</sub> . R <sub>4</sub> = OH   | <chem>OC12C3(O)C(OC(/C(C)=C/C)=O)C(C2)(C<br/>C(C([H])C(OC)=O)C1(C)C45C(C(C6(C)C(<br/>O)C5)=CC(OC6C7=COC=C7)=O)(O8)C3O<br/>C8(C(C)C)O4</chem>        |
| 98  | C <sub>38</sub> H <sub>42</sub> O <sub>13</sub> | 706.2625 | 707.2704 | R = H. R <sub>1</sub> = Bz. R <sub>2</sub> = OH. R <sub>3</sub> = CH(CH <sub>3</sub> ) <sub>2</sub> . R <sub>4</sub> = OH   | <chem>OC12C3(O)C(OC(C4=CC=CC=C4)=O)C(C<br/>2)(C)C(C([H])C(OC)=O)C1(C)C56C(C(C7(<br/>C)C(O)C6)=CC(OC7C8=COC=C8)=O)(O9)<br/>C3OC9(C(C)C)O5</chem>     |
| 99  | C <sub>38</sub> H <sub>46</sub> O <sub>15</sub> | 742.2837 | 743.2915 | R = OAc. R <sub>1</sub> = Tg. R <sub>2</sub> = OH. R <sub>3</sub> = CH(CH <sub>3</sub> ) <sub>2</sub> . R <sub>4</sub> = OH | <chem>OC12C3(O)C(OC(/C(C)=C/C)=O)C(C2)(C<br/>C(C(OC(C)=O)C(OC)=O)C1(C)C45C(C(C6<br/>(C)C(O)C5)=CC(OC6C7=COC=C7)=O)(O8<br/>)C3OC8(C(C)C)O4</chem>    |
| 100 | C <sub>40</sub> H <sub>44</sub> O <sub>15</sub> | 764.2680 | 765.2758 | R = OAc. R <sub>1</sub> = Bz. R <sub>2</sub> = OH. R <sub>3</sub> = CH(CH <sub>3</sub> ) <sub>2</sub> . R <sub>4</sub> = OH | <chem>OC12C3(O)C(OC(C4=CC=CC=C4)=O)C(C<br/>2)(C)C(C(OC(C)=O)C(OC)=O)C1(C)C56C(<br/>C(C7(C)C(O)C6)=CC(OC7C8=COC=C8)=<br/>O)(O9)C3OC9(C(C)C)O5</chem> |
| 101 | C <sub>38</sub> H <sub>46</sub> O <sub>14</sub> | 726.2888 | 727.2966 | R = H. R <sub>1</sub> = Tg. R <sub>2</sub> = OAc. R <sub>3</sub> = CH(CH <sub>3</sub> ) <sub>2</sub> . R <sub>4</sub> = OH  | <chem>OC12C3(OC(C)=O)C(OC(/C(C)=C/C)=O)<br/>C(C2)(C)C(C([H])C(OC)=O)C1(C)C45C(C<br/>(C6(C)C(O)C5)=CC(OC6C7=COC=C7)=O)<br/>(O8)C3OC8(C(C)C)O4</chem> |



|     |                                                 |          |          |                                                                                                                                             |                                                                                                                              |
|-----|-------------------------------------------------|----------|----------|---------------------------------------------------------------------------------------------------------------------------------------------|------------------------------------------------------------------------------------------------------------------------------|
| 102 | C <sub>40</sub> H <sub>44</sub> O <sub>14</sub> | 748.2731 | 749.2809 | R = H. R <sub>1</sub> = Bz. R <sub>2</sub> = OAc. R <sub>3</sub> = CH(CH <sub>3</sub> ) <sub>2</sub> . R <sub>4</sub> = OH                  | OC12C3(OC(C)=O)C(OC(C4=CC=CC=C4)=O)C(C2)(C)C(C([H]))C(OC)=O)C1(C)C56C(C(C7(C)C(O)C6)=CC(OC7C8=COC=C8)=O)(O9)C3OC9(C(C)C)O5   |
| 103 | C <sub>40</sub> H <sub>48</sub> O <sub>16</sub> | 784.2942 | 785.3021 | R = OAc. R <sub>1</sub> = Tg. R <sub>2</sub> = OAc. R <sub>3</sub> = CH(CH <sub>3</sub> ) <sub>2</sub> . R <sub>4</sub> = OH                | OC12C3(OC(C)=O)C(OC(/C(C)=C/C)=O)C(C2)(C)C(C(OC(C)=O)C(OC)=O)C1(C)C45C(C(C6(C)C(O)C5)=CC(OC6C7=COC=C7)=O)(O8)C3OC8(C(C)C)O4  |
| 104 | C <sub>42</sub> H <sub>46</sub> O <sub>16</sub> | 806.2786 | 807.2864 | R = OAc. R <sub>1</sub> = Bz. R <sub>2</sub> = OAc. R <sub>3</sub> = CH(CH <sub>3</sub> ) <sub>2</sub> . R <sub>4</sub> = OH                | OC12C3(OC(C)=O)C(OC(C4=CC=CC=C4)=O)C(C2)(C)C(C(OC(C)=O)C(OC)=O)C1(C)C56C(C(C7(C)C(O)C6)=CC(OC7C8=CO=C8)=O)(O9)C3OC9(C(C)C)O5 |
| 105 | C <sub>37</sub> H <sub>46</sub> O <sub>13</sub> | 698.2938 | 699.3017 | R = H. R <sub>1</sub> = Tg. R <sub>2</sub> = OH. R <sub>3</sub> = CH <sub>3</sub> CHCH <sub>2</sub> CH <sub>3</sub> . R <sub>4</sub> = OH   | OC12C3(O)C(OC(/C(C)=C/C)=O)C(C2)(C)C(C([H]))C(OC)=O)C1(C)C45C(C(C6(C)C(O)C5)=CC(OC6C7=COC=C7)=O)(O8)C3OC8(C(C)CC)O4          |
| 106 | C <sub>39</sub> H <sub>44</sub> O <sub>13</sub> | 720.2782 | 721.2860 | R = H. R <sub>1</sub> = Bz. R <sub>2</sub> = OH. R <sub>3</sub> = CH <sub>3</sub> CHCH <sub>2</sub> CH <sub>3</sub> . R <sub>4</sub> = OH   | OC12C3(O)C(OC(C4=CC=CC=C4)=O)C(C2)(C)C(C([H]))C(OC)=O)C1(C)C56C(C(C7(C)C(O)C6)=CC(OC7C8=COC=C8)=O)(O9)C3OC9(C(C)CC)O5        |
| 107 | C <sub>39</sub> H <sub>48</sub> O <sub>15</sub> | 756.2993 | 757.3071 | R = OAc. R <sub>1</sub> = Tg. R <sub>2</sub> = OH. R <sub>3</sub> = CH <sub>3</sub> CHCH <sub>2</sub> CH <sub>3</sub> . R <sub>4</sub> = OH | OC12C3(O)C(OC(/C(C)=C/C)=O)C(C2)(C)C(C(OC(C)=O)C(OC)=O)C1(C)C45C(C(C6                                                        |

|     |                                                 |          |          |                                                                                                                                              |  |                                                                                                                                 |
|-----|-------------------------------------------------|----------|----------|----------------------------------------------------------------------------------------------------------------------------------------------|--|---------------------------------------------------------------------------------------------------------------------------------|
|     |                                                 |          |          |                                                                                                                                              |  | (C)C(O)C5)=CC(OC6C7=COC=C7)=O)(O8)<br>C3OC8(C(C)CC)O4                                                                           |
| 108 | C <sub>41</sub> H <sub>46</sub> O <sub>15</sub> | 778.2837 | 779.2915 | R = OAc. R <sub>1</sub> = Bz. R <sub>2</sub> = OH. R <sub>3</sub> = CH <sub>3</sub> CHCH <sub>2</sub> CH <sub>3</sub> . R <sub>4</sub> = OH  |  | OC12C3(O)C(OC(C4=CC=CC=C4)=O)C(C2)(C)C(C(OC(C)=O)C(OC)=O)C1(C)C56C(C(C7(C)C(O)C6)=CC(OC7C8=COC=C8)=O)(O9)C3OC9(C(C)CC)O5        |
| 109 | C <sub>39</sub> H <sub>48</sub> O <sub>14</sub> | 740.3044 | 741.3122 | R = H. R <sub>1</sub> = Tg. R <sub>2</sub> = OAc. R <sub>3</sub> = CH <sub>3</sub> CHCH <sub>2</sub> CH <sub>3</sub> . R <sub>4</sub> = OH   |  | OC12C3(OC(C)=O)C(OC(/C(C)=C/C)=O)C(C2)(C)C(C([H])C(OC)=O)C1(C)C45C(C(C6(C)C(O)C5)=CC(OC6C7=COC=C7)=O)(O8)C3OC8(C(C)CC)O4        |
| 110 | C <sub>41</sub> H <sub>46</sub> O <sub>14</sub> | 762.2888 | 763.2966 | R = H. R <sub>1</sub> = Bz. R <sub>2</sub> = OAc. R <sub>3</sub> = CH <sub>3</sub> CHCH <sub>2</sub> CH <sub>3</sub> . R <sub>4</sub> = OH   |  | OC12C3(OC(C)=O)C(OC(C4=CC=CC=C4)=O)C(C2)(C)C(C([H])C(OC)=O)C1(C)C56C(C(C7(C)C(O)C6)=CC(OC7C8=COC=C8)=O)(O9)C3OC9(C(C)CC)O5      |
| 111 | C <sub>41</sub> H <sub>50</sub> O <sub>16</sub> | 798.3099 | 799.3177 | R = OAc. R <sub>1</sub> = Tg. R <sub>2</sub> = OAc. R <sub>3</sub> = CH <sub>3</sub> CHCH <sub>2</sub> CH <sub>3</sub> . R <sub>4</sub> = OH |  | OC12C3(OC(C)=O)C(OC(/C(C)=C/C)=O)C(C2)(C)C(C(OC(C)=O)C(OC)=O)C1(C)C45C(C(C6(C)C(O)C5)=CC(OC6C7=COC=C7)=O)(O8)C3OC8(C(C)CC)O4    |
| 112 | C <sub>43</sub> H <sub>48</sub> O <sub>16</sub> | 820.2942 | 821.3021 | R = OAc. R <sub>1</sub> = Bz. R <sub>2</sub> = OAc. R <sub>3</sub> = CH <sub>3</sub> CHCH <sub>2</sub> CH <sub>3</sub> . R <sub>4</sub> = OH |  | OC12C3(OC(C)=O)C(OC(C4=CC=CC=C4)=O)C(C2)(C)C(C(OC(C)=O)C(OC)=O)C1(C)C56C(C(C7(C)C(O)C6)=CC(OC7C8=CO C=C8)=O)(O9)C3OC9(C(C)CC)O5 |

|     |                                                 |          |          |                                                                                                                                   |                                                                                                                              |
|-----|-------------------------------------------------|----------|----------|-----------------------------------------------------------------------------------------------------------------------------------|------------------------------------------------------------------------------------------------------------------------------|
| 113 | C <sub>37</sub> H <sub>44</sub> O <sub>13</sub> | 696.2782 | 697.2860 | R = H. R <sub>1</sub> = Tg. R <sub>2</sub> = OH. R <sub>3</sub> = (E)-CH <sub>3</sub> C=CHCH <sub>3</sub> . R <sub>4</sub> = OH   | OC12C3(O)C(OC(/C(C)=C/C)=O)C(C2)(C)C(C([H]))C(OC)=O)C1(C)C45C(C(C6(C)C(O)C5)=CC(OC6C7=COC=C7)=O)(O8)C3OC8(/C(C)=C/C)O4       |
| 114 | C <sub>39</sub> H <sub>42</sub> O <sub>13</sub> | 718.2625 | 719.2704 | R = H. R <sub>1</sub> = Bz. R <sub>2</sub> = OH. R <sub>3</sub> = (E)-CH <sub>3</sub> C=CHCH <sub>3</sub> . R <sub>4</sub> = OH   | OC12C3(O)C(OC(C4=CC=CC=C4)=O)C(C2)(C)C(C([H]))C(OC)=O)C1(C)C56C(C(C7(C)C(O)C6)=CC(OC7C8=COC=C8)=O)(O9)C3OC9(/C(C)=C/C)O5     |
| 115 | C <sub>39</sub> H <sub>46</sub> O <sub>15</sub> | 754.2837 | 755.2915 | R = OAc. R <sub>1</sub> = Tg. R <sub>2</sub> = OH. R <sub>3</sub> = (E)-CH <sub>3</sub> C=CHCH <sub>3</sub> . R <sub>4</sub> = OH | OC12C3(O)C(OC(/C(C)=C/C)=O)C(C2)(C)C(C(OC(C)=O)C(OC)=O)C1(C)C45C(C(C6(C)C(O)C5)=CC(OC6C7=COC=C7)=O)(O8)C3OC8(/C(C)=C/C)O4    |
| 116 | C <sub>41</sub> H <sub>44</sub> O <sub>15</sub> | 776.2680 | 777.2758 | R = OAc. R <sub>1</sub> = Bz. R <sub>2</sub> = OH. R <sub>3</sub> = (E)-CH <sub>3</sub> C=CHCH <sub>3</sub> . R <sub>4</sub> = OH | OC12C3(O)C(OC(C4=CC=CC=C4)=O)C(C2)(C)C(C(OC(C)=O)C(OC)=O)C1(C)C56C(C(C7(C)C(O)C6)=CC(OC7C8=COC=C8)=O)(O9)C3OC9(/C(C)=C/C)O5  |
| 117 | C <sub>39</sub> H <sub>46</sub> O <sub>14</sub> | 738.2888 | 739.2966 | R = H. R <sub>1</sub> = Tg. R <sub>2</sub> = OAc. R <sub>3</sub> = (E)-CH <sub>3</sub> C=CHCH <sub>3</sub> . R <sub>4</sub> = OH  | OC12C3(OC(C)=O)C(OC(/C(C)=C/C)=O)C(C2)(C)C(C([H]))C(OC)=O)C1(C)C45C(C(C6(C)C(O)C5)=CC(OC6C7=COC=C7)=O)(O8)C3OC8(/C(C)=C/C)O4 |
| 118 | C <sub>41</sub> H <sub>44</sub> O <sub>14</sub> | 760.2731 | 761.2809 | R = H. R <sub>1</sub> = Bz. R <sub>2</sub> = OAc. R <sub>3</sub> = (E)-CH <sub>3</sub> C=CHCH <sub>3</sub> . R <sub>4</sub> = OH  | OC12C3(OC(C)=O)C(OC(C4=CC=CC=C4)=O)C(C2)(C)C(C([H]))C(OC)=O)C1(C)C56                                                         |

|     |                                                 |          |          |                                                                                                                                       |                                                                                                                                                 |
|-----|-------------------------------------------------|----------|----------|---------------------------------------------------------------------------------------------------------------------------------------|-------------------------------------------------------------------------------------------------------------------------------------------------|
|     |                                                 |          |          |                                                                                                                                       | <chem>C(C(C7(C)C(O)C6)=CC(OC7C8=COC=C8)=O)(O9)C3OC9(/C(C)=C/C)O5</chem>                                                                         |
| 119 | C <sub>41</sub> H <sub>48</sub> O <sub>16</sub> | 796.2942 | 797.3021 | R = OAc. R <sub>1</sub> = Tg. R <sub>2</sub> = OAc. R <sub>3</sub> = (E)-CH <sub>3</sub> C=CHCH <sub>3</sub> .<br>R <sub>4</sub> = OH | <chem>OC12C3(OC(C)=O)C(OC(/C(C)=C/C)=O)C(C2)(C)C(C(OC(C)=O)C(OC)=O)C1(C)C45C(C(C6(C)C(O)C5)=CC(OC6C7=COC=C7)=O)(O8)C3OC8(/C(C)=C/C)O4</chem>    |
| 120 | C <sub>43</sub> H <sub>46</sub> O <sub>16</sub> | 818.2786 | 819.2864 | R = OAc. R <sub>1</sub> = Bz. R <sub>2</sub> = OAc. R <sub>3</sub> = (E)-CH <sub>3</sub> C=CHCH <sub>3</sub> .<br>R <sub>4</sub> = OH | <chem>OC12C3(OC(C)=O)C(OC(C4=CC=CC=C4)=O)C(C2)(C)C(C(OC(C)=O)C(OC)=O)C1(C)C56C(C(C7(C)C(O)C6)=CC(OC7C8=CO=C=C8)=O)(O9)C3OC9(/C(C)=C/C)O5</chem> |
| 121 | C <sub>34</sub> H <sub>40</sub> O <sub>11</sub> | 624.2571 | 625.2649 | R = H. R <sub>1</sub> = Tg. R <sub>2</sub> = H. R <sub>3</sub> = CH <sub>3</sub> . R <sub>4</sub> = H                                 | <chem>OC12C3([H])C(OC(/C(C)=C/C)=O)C(C2)(C)C(C([H])C(OC)=O)C1(C)C45C(C(C6(C)C([H])C5)=CC(OC6C7=COC=C7)=O)(O8)C3OC8(C)O4</chem>                  |
| 122 | C <sub>36</sub> H <sub>38</sub> O <sub>11</sub> | 646.2424 | 647.2492 | R = H. R <sub>1</sub> = Bz. R <sub>2</sub> = H. R <sub>3</sub> = CH <sub>3</sub> . R <sub>4</sub> = H                                 | <chem>OC12C3([H])C(OC(C4=CC=CC=C4)=O)C(C2)(C)C(C([H])C(OC)=O)C1(C)C56C(C(C7(C)C([H])C6)=CC(OC7C8=COC=C8)=O)(O9)C3OC9(C)O5</chem>                |
| 123 | C <sub>36</sub> H <sub>42</sub> O <sub>13</sub> | 682.2625 | 683.2704 | R = OAc. R <sub>1</sub> = Tg. R <sub>2</sub> = H. R <sub>3</sub> = CH <sub>3</sub> . R <sub>4</sub> = H                               | <chem>OC12C3([H])C(OC(/C(C)=C/C)=O)C(C2)(C)C(C(OC(C)=O)C(OC)=O)C1(C)C45C(C(C6(C)C([H])C5)=CC(OC6C7=COC=C7)=O)(O8)C3OC8(C)O4</chem>              |

|     |                                                 |          |          |                                                                                                           |                                                                                                                             |
|-----|-------------------------------------------------|----------|----------|-----------------------------------------------------------------------------------------------------------|-----------------------------------------------------------------------------------------------------------------------------|
| 124 | C <sub>38</sub> H <sub>40</sub> O <sub>13</sub> | 704.2469 | 705.2547 | R = OAc. R <sub>1</sub> = Bz. R <sub>2</sub> = H. R <sub>3</sub> = CH <sub>3</sub> . R <sub>4</sub> = H   | OC12C3([H])C(OC(C4=CC=CC=C4)=O)C(C2)(C)C(C(OC(C)=O)C(OC)=O)C1(C)C56C(C(C7(C)C([H])C6)=CC(OC7C8=COC=C8)=O)(O9)C3OC9(C)O5     |
| 125 | C <sub>36</sub> H <sub>42</sub> O <sub>13</sub> | 682.2625 | 683.2704 | R = H. R <sub>1</sub> = Tg. R <sub>2</sub> = H. R <sub>3</sub> = CH <sub>3</sub> . R <sub>4</sub> = OAc   | OC12C3([H])C(OC(/C(C)=C/C)=O)C(C2)(C)C(C([H])C(OC)=O)C1(C)C45C(C(C6(C)C(OC(C)=O)C5)=CC(OC6C7=COC=C7)=O)(O8)C3OC8(C)O4       |
| 126 | C <sub>38</sub> H <sub>40</sub> O <sub>13</sub> | 704.2469 | 705.2547 | R = H. R <sub>1</sub> = Bz. R <sub>2</sub> = H. R <sub>3</sub> = CH <sub>3</sub> . R <sub>4</sub> = OAc   | OC12C3([H])C(OC(C4=CC=CC=C4)=O)C(C2)(C)C(C([H])C(OC)=O)C1(C)C56C(C(C7(C)C(OC(C)=O)C6)=CC(OC7C8=COC=C8)=O)(O9)C3OC9(C)O5     |
| 127 | C <sub>38</sub> H <sub>44</sub> O <sub>15</sub> | 740.2680 | 741.2758 | R = OAc. R <sub>1</sub> = Tg. R <sub>2</sub> = H. R <sub>3</sub> = CH <sub>3</sub> . R <sub>4</sub> = OAc | OC12C3([H])C(OC(/C(C)=C/C)=O)C(C2)(C)C(C(OC(C)=O)C(OC)=O)C1(C)C45C(C(C6(C)C(OC(C)=O)C5)=CC(OC6C7=COC=C7)=O)(O8)C3OC8(C)O4   |
| 128 | C <sub>40</sub> H <sub>42</sub> O <sub>15</sub> | 762.2524 | 763.2602 | R = OAc. R <sub>1</sub> = Bz. R <sub>2</sub> = H. R <sub>3</sub> = CH <sub>3</sub> . R <sub>4</sub> = OAc | OC12C3([H])C(OC(C4=CC=CC=C4)=O)C(C2)(C)C(C(OC(C)=O)C(OC)=O)C1(C)C56C(C(C7(C)C(OC(C)=O)C6)=CC(OC7C8=COC=C8)=O)(O9)C3OC9(C)O5 |
| 129 | C <sub>34</sub> H <sub>40</sub> O <sub>12</sub> | 640.2520 | 641.2598 | R = H. R <sub>1</sub> = Tg. R <sub>2</sub> = H. R <sub>3</sub> = CH <sub>3</sub> . R <sub>4</sub> = OH    | OC12C3([H])C(OC(/C(C)=C/C)=O)C(C2)(C)C(C([H])C(OC)=O)C1(C)C45C(C(C6(C)                                                      |

|     |                                                 |          |          |                                                                                                                       |                                                                                                                                    |
|-----|-------------------------------------------------|----------|----------|-----------------------------------------------------------------------------------------------------------------------|------------------------------------------------------------------------------------------------------------------------------------|
|     |                                                 |          |          |                                                                                                                       | <chem>C(O)C5=CC(OC6C7=COC=C7)=O)(O8)C3OC8(C)O4</chem>                                                                              |
| 130 | C <sub>36</sub> H <sub>38</sub> O <sub>12</sub> | 662.2363 | 663.2442 | R = H. R <sub>1</sub> = Bz. R <sub>2</sub> = H. R <sub>3</sub> = CH <sub>3</sub> . R <sub>4</sub> = OH                | <chem>OC12C3([H])C(OC(C4=CC=CC=C4)=O)C(C2)(C)C(C([H])C(OC)=O)C1(C)C56C(C(C7(C)C(O)C6)=CC(OC7C8=COC=C8)=O)(O9)C3OC9(C)O5</chem>     |
| 131 | C <sub>36</sub> H <sub>42</sub> O <sub>14</sub> | 698.2575 | 699.2653 | R = OAc. R <sub>1</sub> = Tg. R <sub>2</sub> = H. R <sub>3</sub> = CH <sub>3</sub> . R <sub>4</sub> = OH              | <chem>OC12C3([H])C(OC(/C(C)=C/C)=O)C(C2)(C)C(C(OC(C)=O)C(OC)=O)C1(C)C45C(C(C6(C)C(O)C5)=CC(OC6C7=COC=C7)=O)(O8)C3OC8(C)O4</chem>   |
| 132 | C <sub>38</sub> H <sub>40</sub> O <sub>14</sub> | 720.2418 | 721.2496 | R = OAc. R <sub>1</sub> = Bz. R <sub>2</sub> = H. R <sub>3</sub> = CH <sub>3</sub> . R <sub>4</sub> = OH              | <chem>OC12C3([H])C(OC(C4=CC=CC=C4)=O)C(C2)(C)C(C(OC(C)=O)C(OC)=O)C1(C)C56C(C(C7(C)C(O)C6)=CC(OC7C8=COC=C8)=O)(O9)C3OC9(C)O5</chem> |
| 133 | C <sub>35</sub> H <sub>42</sub> O <sub>11</sub> | 638.2727 | 639.2809 | R = H. R <sub>1</sub> = Tg. R <sub>2</sub> = H. R <sub>3</sub> = CH <sub>2</sub> CH <sub>3</sub> . R <sub>4</sub> = H | <chem>OC12C3([H])C(OC(/C(C)=C/C)=O)C(C2)(C)C(C([H])C(OC)=O)C1(C)C45C(C(C6(C)C([H])C5)=CC(OC6C7=COC=C7)=O)(O8)C3OC8(CC)O4</chem>    |
| 134 | C <sub>37</sub> H <sub>40</sub> O <sub>11</sub> | 660.2571 | 661.2649 | R = H. R <sub>1</sub> = Bz. R <sub>2</sub> = H. R <sub>3</sub> = CH <sub>2</sub> CH <sub>3</sub> . R <sub>4</sub> = H | <chem>OC12C3([H])C(OC(C4=CC=CC=C4)=O)C(C2)(C)C(C([H])C(OC)=O)C1(C)C56C(C(C7(C)C([H])C6)=CC(OC7C8=COC=C8)=O)(O9)C3OC9(CC)O5</chem>  |

|     |                                                 |          |          |                                                                                                                           |                                                                                                                            |
|-----|-------------------------------------------------|----------|----------|---------------------------------------------------------------------------------------------------------------------------|----------------------------------------------------------------------------------------------------------------------------|
| 135 | C <sub>37</sub> H <sub>44</sub> O <sub>13</sub> | 696.2782 | 697.2860 | R = OAc. R <sub>1</sub> = Tg. R <sub>2</sub> = H. R <sub>3</sub> = CH <sub>2</sub> CH <sub>3</sub> . R <sub>4</sub> = H   | OC12C3([H])C(OC(/C(C)=C/C)=O)C(C2)(C)C(C(OC(C)=O)C(OC)=O)C1(C)C45C(C(C6(C)C([H])C5)=CC(OC6C7=COC=C7)=O)(O8)C3OC8(CC)O4     |
| 136 | C <sub>39</sub> H <sub>42</sub> O <sub>13</sub> | 718.2625 | 719.2704 | R = OAc. R <sub>1</sub> = Bz. R <sub>2</sub> = H. R <sub>3</sub> = CH <sub>2</sub> CH <sub>3</sub> . R <sub>4</sub> = H   | OC12C3([H])C(OC(C4=CC=CC=C4)=O)C(C2)(C)C(C(OC(C)=O)C(OC)=O)C1(C)C56C(C(C7(C)C([H])C6)=CC(OC7C8=COC=C8)=O)(O9)C3OC9(CC)O5   |
| 137 | C <sub>37</sub> H <sub>44</sub> O <sub>13</sub> | 696.2782 | 697.2860 | R = H. R <sub>1</sub> = Tg. R <sub>2</sub> = H. R <sub>3</sub> = CH <sub>2</sub> CH <sub>3</sub> . R <sub>4</sub> = OAc   | OC12C3([H])C(OC(/C(C)=C/C)=O)C(C2)(C)C(C([H])C(OC)=O)C1(C)C45C(C(C6(C)C(OC(C)=O)C5)=CC(OC6C7=COC=C7)=O)(O8)C3OC8(CC)O4     |
| 138 | C <sub>39</sub> H <sub>42</sub> O <sub>13</sub> | 718.2625 | 719.2704 | R = H. R <sub>1</sub> = Bz. R <sub>2</sub> = H. R <sub>3</sub> = CH <sub>2</sub> CH <sub>3</sub> . R <sub>4</sub> = OAc   | OC12C3([H])C(OC(C4=CC=CC=C4)=O)C(C2)(C)C(C([H])C(OC)=O)C1(C)C56C(C(C7(C)C(OC(C)=O)C6)=CC(OC7C8=COC=C8)=O)(O9)C3OC9(CC)O5   |
| 139 | C <sub>39</sub> H <sub>46</sub> O <sub>15</sub> | 754.2837 | 755.2915 | R = OAc. R <sub>1</sub> = Tg. R <sub>2</sub> = H. R <sub>3</sub> = CH <sub>2</sub> CH <sub>3</sub> . R <sub>4</sub> = OAc | OC12C3([H])C(OC(/C(C)=C/C)=O)C(C2)(C)C(C(OC(C)=O)C(OC)=O)C1(C)C45C(C(C6(C)C(OC(C)=O)C5)=CC(OC6C7=COC=C7)=O)(O8)C3OC8(CC)O4 |
| 140 | C <sub>41</sub> H <sub>44</sub> O <sub>15</sub> | 776.2680 | 777.2758 | R = OAc. R <sub>1</sub> = Bz. R <sub>2</sub> = H. R <sub>3</sub> = CH <sub>2</sub> CH <sub>3</sub> . R <sub>4</sub> = OAc | OC12C3([H])C(OC(C4=CC=CC=C4)=O)C(C2)(C)C(C(OC(C)=O)C(OC)=O)C1(C)C56                                                        |

|     |                                                 |          |          |                                                                                                                          |                                                                                                                                     |
|-----|-------------------------------------------------|----------|----------|--------------------------------------------------------------------------------------------------------------------------|-------------------------------------------------------------------------------------------------------------------------------------|
|     |                                                 |          |          |                                                                                                                          | <chem>C(C(C7(C)C(OC(C)=O)C6)=CC(OC7C8=COC=C8)=O)(O9)C3OC9(CC)O5</chem>                                                              |
| 141 | C <sub>35</sub> H <sub>42</sub> O <sub>12</sub> | 654.2676 | 655.2755 | R = H, R <sub>1</sub> = Tg, R <sub>2</sub> = H, R <sub>3</sub> = CH <sub>2</sub> CH <sub>3</sub> , R <sub>4</sub> = OH   | <chem>OC12C3([H])C(OC(/C(C)=C/C)=O)C(C2)(C)C(C([H])C(OC)=O)C1(C)C45C(C(C6(C)C(O)C5)=CC(OC6C7=COC=C7)=O)(O8)C3OC8(CC)O4</chem>       |
| 142 | C <sub>37</sub> H <sub>40</sub> O <sub>12</sub> | 676.2520 | 677.2598 | R = H, R <sub>1</sub> = Bz, R <sub>2</sub> = H, R <sub>3</sub> = CH <sub>2</sub> CH <sub>3</sub> , R <sub>4</sub> = OH   | <chem>OC12C3([H])C(OC(C4=CC=CC=C4)=O)C(C2)(C)C(C([H])C(OC)=O)C1(C)C56C(C(C7(C)C(O)C6)=CC(OC7C8=COC=C8)=O)(O9)C3OC9(CC)O5</chem>     |
| 143 | C <sub>37</sub> H <sub>44</sub> O <sub>14</sub> | 712.2731 | 713.2809 | R = OAc, R <sub>1</sub> = Tg, R <sub>2</sub> = H, R <sub>3</sub> = CH <sub>2</sub> CH <sub>3</sub> , R <sub>4</sub> = OH | <chem>OC12C3([H])C(OC(/C(C)=C/C)=O)C(C2)(C)C(C(OC(C)=O)C(OC)=O)C1(C)C45C(C(C6(C)C(O)C5)=CC(OC6C7=COC=C7)=O)(O8)C3OC8(CC)O4</chem>   |
| 144 | C <sub>39</sub> H <sub>42</sub> O <sub>14</sub> | 734.2575 | 735.2653 | R = OAc, R <sub>1</sub> = Bz, R <sub>2</sub> = H, R <sub>3</sub> = CH <sub>2</sub> CH <sub>3</sub> , R <sub>4</sub> = OH | <chem>OC12C3([H])C(OC(C4=CC=CC=C4)=O)C(C2)(C)C(C(OC(C)=O)C(OC)=O)C1(C)C56C(C(C7(C)C(O)C6)=CC(OC7C8=COC=C8)=O)(O9)C3OC9(CC)O5</chem> |
| 145 | C <sub>36</sub> H <sub>44</sub> O <sub>11</sub> | 652.2884 | 653.2962 | R = H, R <sub>1</sub> = Tg, R <sub>2</sub> = H, R <sub>3</sub> = CH(CH <sub>3</sub> ) <sub>2</sub> , R <sub>4</sub> = H  | <chem>OC12C3([H])C(OC(/C(C)=C/C)=O)C(C2)(C)C(C([H])C(OC)=O)C1(C)C45C(C(C6(C)C([H])C5)=CC(OC6C7=COC=C7)=O)(O8)C3OC8(C(C)C)O4</chem>  |



|     |                                                 |          |          |                                                                                                                             |                                                                                                                             |
|-----|-------------------------------------------------|----------|----------|-----------------------------------------------------------------------------------------------------------------------------|-----------------------------------------------------------------------------------------------------------------------------|
| 146 | C <sub>38</sub> H <sub>42</sub> O <sub>11</sub> | 674.2727 | 675.2805 | R = H. R <sub>1</sub> = Bz. R <sub>2</sub> = H. R <sub>3</sub> = CH(CH <sub>3</sub> ) <sub>2</sub> . R <sub>4</sub> = H     | OC12C3([H])C(OC(C4=CC=CC=C4)=O)C(C2)(C)C(C([H])C(OC)=O)C1(C)C56C(C(C7(C)C([H])C6)=CC(OC7C8=COC=C8)=O)(O9)C3OC9(C(C)C)O5     |
| 147 | C <sub>38</sub> H <sub>46</sub> O <sub>13</sub> | 710.2938 | 711.3017 | R = OAc. R <sub>1</sub> = Tg. R <sub>2</sub> = H. R <sub>3</sub> = CH(CH <sub>3</sub> ) <sub>2</sub> . R <sub>4</sub> = H   | OC12C3([H])C(OC(/C(C)=C/C)=O)C(C2)(C)C(C(OC(C)=O)C(OC)=O)C1(C)C45C(C(C6(C)C([H])C5)=CC(OC6C7=COC=C7)=O)(O8)C3OC8(C(C)C)O4   |
| 148 | C <sub>40</sub> H <sub>44</sub> O <sub>13</sub> | 732.2782 | 733.2860 | R = OAc. R <sub>1</sub> = Bz. R <sub>2</sub> = H. R <sub>3</sub> = CH(CH <sub>3</sub> ) <sub>2</sub> . R <sub>4</sub> = H   | OC12C3([H])C(OC(C4=CC=CC=C4)=O)C(C2)(C)C(C(OC(C)=O)C(OC)=O)C1(C)C56C(C(C7(C)C([H])C6)=CC(OC7C8=COC=C8)=O)(O9)C3OC9(C(C)C)O5 |
| 149 | C <sub>38</sub> H <sub>46</sub> O <sub>13</sub> | 710.2938 | 711.3017 | R = H. R <sub>1</sub> = Tg. R <sub>2</sub> = H. R <sub>3</sub> = CH(CH <sub>3</sub> ) <sub>2</sub> . R <sub>4</sub> = OAc   | OC12C3([H])C(OC(/C(C)=C/C)=O)C(C2)(C)C(C([H])C(OC)=O)C1(C)C45C(C(C6(C)C(OC(C)=O)C5)=CC(OC6C7=COC=C7)=O)(O8)C3OC8(C(C)C)O4   |
| 150 | C <sub>40</sub> H <sub>44</sub> O <sub>13</sub> | 732.2782 | 733.2860 | R = H. R <sub>1</sub> = Bz. R <sub>2</sub> = H. R <sub>3</sub> = CH(CH <sub>3</sub> ) <sub>2</sub> . R <sub>4</sub> = OAc   | OC12C3([H])C(OC(C4=CC=CC=C4)=O)C(C2)(C)C(C([H])C(OC)=O)C1(C)C56C(C(C7(C)C(OC(C)=O)C6)=CC(OC7C8=COC=C8)=O)(O9)C3OC9(C(C)C)O5 |
| 151 | C <sub>40</sub> H <sub>48</sub> O <sub>15</sub> | 768.2998 | 769.3071 | R = OAc. R <sub>1</sub> = Tg. R <sub>2</sub> = H. R <sub>3</sub> = CH(CH <sub>3</sub> ) <sub>2</sub> . R <sub>4</sub> = OAc | OC12C3([H])C(OC(/C(C)=C/C)=O)C(C2)(C)C(C(OC(C)=O)C(OC)=O)C1(C)C45C(C(                                                       |

|     |                                                 |          |          |                                                                                                                             |                                                                                                                                             |
|-----|-------------------------------------------------|----------|----------|-----------------------------------------------------------------------------------------------------------------------------|---------------------------------------------------------------------------------------------------------------------------------------------|
|     |                                                 |          |          |                                                                                                                             | <chem>C6(C)C(OC(C)=O)C5)=CC(OC6C7=COC=C7)=O)(O8)C3OC8(C(C)C)O4</chem>                                                                       |
| 152 | C <sub>42</sub> H <sub>46</sub> O <sub>15</sub> | 790.2837 | 791.2915 | R = OAc. R <sub>1</sub> = Bz. R <sub>2</sub> = H. R <sub>3</sub> = CH(CH <sub>3</sub> ) <sub>2</sub> . R <sub>4</sub> = OAc | <chem>OC12C3([H])C(OC(C4=CC=CC=C4)=O)C(C2)(C)C(C(OC(C)=O)C(OC)=O)C1(C)C56C(C(C7(C)C(OC(C)=O)C6)=CC(OC7C8=CO=C8)=O)(O9)C3OC9(C(C)C)O5</chem> |
| 153 | C <sub>36</sub> H <sub>44</sub> O <sub>12</sub> | 668.2833 | 669.2911 | R = H. R <sub>1</sub> = Tg. R <sub>2</sub> = H. R <sub>3</sub> = CH(CH <sub>3</sub> ) <sub>2</sub> . R <sub>4</sub> = OH    | <chem>OC12C3([H])C(OC(/C(C)=C/C)=O)C(C2)(C)C(C([H])C(OC)=O)C1(C)C45C(C(C6(C)C(O)C5)=CC(OC6C7=COC=C7)=O)(O8)C3OC8(C(C)C)O4</chem>            |
| 154 | C <sub>38</sub> H <sub>42</sub> O <sub>12</sub> | 690.2676 | 691.2755 | R = H. R <sub>1</sub> = Bz. R <sub>2</sub> = H. R <sub>3</sub> = CH(CH <sub>3</sub> ) <sub>2</sub> . R <sub>4</sub> = OH    | <chem>OC12C3([H])C(OC(C4=CC=CC=C4)=O)C(C2)(C)C(C([H])C(OC)=O)C1(C)C56C(C(C7(C)C(O)C6)=CC(OC7C8=COC=C8)=O)(O9)C3OC9(C(C)C)O5</chem>          |
| 155 | C <sub>38</sub> H <sub>46</sub> O <sub>14</sub> | 726.2888 | 727.2966 | R = OAc. R <sub>1</sub> = Tg. R <sub>2</sub> = H. R <sub>3</sub> = CH(CH <sub>3</sub> ) <sub>2</sub> . R <sub>4</sub> = OH  | <chem>OC12C3([H])C(OC(/C(C)=C/C)=O)C(C2)(C)C(C(OC(C)=O)C(OC)=O)C1(C)C45C(C(C6(C)C(O)C5)=CC(OC6C7=COC=C7)=O)(O8)C3OC8(C(C)C)O4</chem>        |
| 156 | C <sub>40</sub> H <sub>44</sub> O <sub>14</sub> | 748.2731 | 749.2809 | R = OAc. R <sub>1</sub> = Bz. R <sub>2</sub> = H. R <sub>3</sub> = CH(CH <sub>3</sub> ) <sub>2</sub> . R <sub>4</sub> = OH  | <chem>OC12C3([H])C(OC(C4=CC=CC=C4)=O)C(C2)(C)C(C(OC(C)=O)C(OC)=O)C1(C)C56C(C(C7(C)C(O)C6)=CC(OC7C8=COC=C8)=O)(O9)C3OC9(C(C)C)O5</chem>      |

|     |                                                 |          |          |                                                                                                                                           |                                                                                                                              |         |
|-----|-------------------------------------------------|----------|----------|-------------------------------------------------------------------------------------------------------------------------------------------|------------------------------------------------------------------------------------------------------------------------------|---------|
| 157 | C <sub>37</sub> H <sub>46</sub> O <sub>11</sub> | 666.3040 | 667.3118 | R = H. R <sub>1</sub> = Tg. R <sub>2</sub> = H. R <sub>3</sub> = CH <sub>3</sub> CHCH <sub>2</sub> CH <sub>3</sub> . R <sub>4</sub> = H   | OC12C3([H])C(OC(/C(C)=C/C)=O)C(C2)(C)C(C([H])C(OC)=O)C1(C)C45C(C(C6(C)C([H])C5)=CC(OC6C7=COC=C7)=O)(O8)C3OC8(C(C)CC)O4       | [1,4,8] |
| 158 | C <sub>39</sub> H <sub>44</sub> O <sub>11</sub> | 688.2884 | 689.2962 | R = H. R <sub>1</sub> = Bz. R <sub>2</sub> = H. R <sub>3</sub> = CH <sub>3</sub> CHCH <sub>2</sub> CH <sub>3</sub> . R <sub>4</sub> = H   | OC12C3([H])C(OC(C4=CC=CC=C4)=O)C(C2)(C)C(C([H])C(OC)=O)C1(C)C56C(C(C7(C)C([H])C6)=CC(OC7C8=COC=C8)=O)(O9)C3OC9(C(C)CC)O5     |         |
| 159 | C <sub>39</sub> H <sub>48</sub> O <sub>13</sub> | 724.3095 | 725.3173 | R = OAc. R <sub>1</sub> = Tg. R <sub>2</sub> = H. R <sub>3</sub> = CH <sub>3</sub> CHCH <sub>2</sub> CH <sub>3</sub> . R <sub>4</sub> = H | OC12C3([H])C(OC(/C(C)=C/C)=O)C(C2)(C)C(C(OC(C)=O)C(OC)=O)C1(C)C45C(C(C6(C)C([H])C5)=CC(OC6C7=COC=C7)=O)(O8)C3OC8(C(C)CC)O4   |         |
| 160 | C <sub>41</sub> H <sub>46</sub> O <sub>13</sub> | 746.2938 | 747.3017 | R = OAc. R <sub>1</sub> = Bz. R <sub>2</sub> = H. R <sub>3</sub> = CH <sub>3</sub> CHCH <sub>2</sub> CH <sub>3</sub> . R <sub>4</sub> = H | OC12C3([H])C(OC(C4=CC=CC=C4)=O)C(C2)(C)C(C(OC(C)=O)C(OC)=O)C1(C)C56C(C(C7(C)C([H])C6)=CC(OC7C8=COC=C8)=O)(O9)C3OC9(C(C)CC)O5 |         |
| 161 | C <sub>39</sub> H <sub>48</sub> O <sub>13</sub> | 724.3095 | 725.3173 | R = H. R <sub>1</sub> = Tg. R <sub>2</sub> = H. R <sub>3</sub> = CH <sub>3</sub> CHCH <sub>2</sub> CH <sub>3</sub> . R <sub>4</sub> = OAc | OC12C3([H])C(OC(/C(C)=C/C)=O)C(C2)(C)C(C([H])C(OC)=O)C1(C)C45C(C(C6(C)C(OC(C)=O)C5)=CC(OC6C7=COC=C7)=O)(O8)C3OC8(C(C)CC)O4   |         |
| 162 | C <sub>41</sub> H <sub>46</sub> O <sub>13</sub> | 746.2938 | 747.3017 | R = H. R <sub>1</sub> = Bz. R <sub>2</sub> = H. R <sub>3</sub> = CH <sub>3</sub> CHCH <sub>2</sub> CH <sub>3</sub> . R <sub>4</sub> = OAc | OC12C3([H])C(OC(C4=CC=CC=C4)=O)C(C2)(C)C(C([H])C(OC)=O)C1(C)C56C(C(C                                                         |         |

|     |                                                 |          |          |                                                                                                                                             |  |                                                                                                                                  |
|-----|-------------------------------------------------|----------|----------|---------------------------------------------------------------------------------------------------------------------------------------------|--|----------------------------------------------------------------------------------------------------------------------------------|
|     |                                                 |          |          |                                                                                                                                             |  | 7(C)C(OC(C)=O)C6)=CC(OC7C8=COC=C8)=O)(O9)C3OC9(C(C)CC)O5                                                                         |
| 163 | C <sub>41</sub> H <sub>50</sub> O <sub>15</sub> | 782.3150 | 783.3228 | R = OAc. R <sub>1</sub> = Tg. R <sub>2</sub> = H. R <sub>3</sub> = CH <sub>3</sub> CHCH <sub>2</sub> CH <sub>3</sub> . R <sub>4</sub> = OAc |  | OC12C3([H])C(OC(/C(C)=C/C)=O)C(C2)(C)C(C(OC(C)=O)C(OC)=O)C1(C)C45C(C(C6(C)C(OC(C)=O)C5)=CC(OC6C7=COC=C7)=O)(O8)C3OC8(C(C)CC)O4   |
| 164 | C <sub>43</sub> H <sub>48</sub> O <sub>15</sub> | 804.2993 | 805.3071 | R = OAc. R <sub>1</sub> = Bz. R <sub>2</sub> = H. R <sub>3</sub> = CH <sub>3</sub> CHCH <sub>2</sub> CH <sub>3</sub> . R <sub>4</sub> = OAc |  | OC12C3([H])C(OC(C4=CC=CC=C4)=O)C(C2)(C)C(C(OC(C)=O)C(OC)=O)C1(C)C56C(C(C7(C)C(OC(C)=O)C6)=CC(OC7C8=COC=C8)=O)(O9)C3OC9(C(C)CC)O5 |
| 165 | C <sub>37</sub> H <sub>46</sub> O <sub>12</sub> | 682.2989 | 683.3068 | R = H. R <sub>1</sub> = Tg. R <sub>2</sub> = H. R <sub>3</sub> = CH <sub>3</sub> CHCH <sub>2</sub> CH <sub>3</sub> . R <sub>4</sub> = OH    |  | OC12C3([H])C(OC(/C(C)=C/C)=O)C(C2)(C)C(C([H])C(OC)=O)C1(C)C45C(C(C6(C)C(O)C5)=CC(OC6C7=COC=C7)=O)(O8)C3OC8(C(C)CC)O4             |
| 166 | C <sub>39</sub> H <sub>44</sub> O <sub>12</sub> | 704.2833 | 705.2911 | R = H. R <sub>1</sub> = Bz. R <sub>2</sub> = H. R <sub>3</sub> = CH <sub>3</sub> CHCH <sub>2</sub> CH <sub>3</sub> . R <sub>4</sub> = OH    |  | OC12C3([H])C(OC(C4=CC=CC=C4)=O)C(C2)(C)C(C([H])C(OC)=O)C1(C)C56C(C(C7(C)C(O)C6)=CC(OC7C8=COC=C8)=O)(O9)C3OC9(C(C)CC)O5           |
| 167 | C <sub>39</sub> H <sub>48</sub> O <sub>14</sub> | 740.3044 | 741.3122 | R = OAc. R <sub>1</sub> = Tg. R <sub>2</sub> = H. R <sub>3</sub> = CH <sub>3</sub> CHCH <sub>2</sub> CH <sub>3</sub> . R <sub>4</sub> = OH  |  | OC12C3([H])C(OC(/C(C)=C/C)=O)C(C2)(C)C(C(OC(C)=O)C(OC)=O)C1(C)C45C(C(C6(C)C(O)C5)=CC(OC6C7=COC=C7)=O)(O8)C3OC8(C(C)CC)O4         |

|     |                                                 |          |          |                                                                                                                                            |                                                                                                                                 |
|-----|-------------------------------------------------|----------|----------|--------------------------------------------------------------------------------------------------------------------------------------------|---------------------------------------------------------------------------------------------------------------------------------|
| 168 | C <sub>41</sub> H <sub>46</sub> O <sub>14</sub> | 762.2888 | 763.2966 | R = OAc. R <sub>1</sub> = Bz. R <sub>2</sub> = H. R <sub>3</sub> = CH <sub>3</sub> CHCH <sub>2</sub> CH <sub>3</sub> . R <sub>4</sub> = OH | OC12C3([H])C(OC(C4=CC=CC=C4)=O)C(C2)(C)C(C(OC(C)=O)C(OC)=O)C1(C)C56C(C(C7(C)C(O)C6)=CC(OC7C8=COC=C8)=O)(O9)C3OC9(C(C)CC)O5      |
| 169 | C <sub>37</sub> H <sub>44</sub> O <sub>11</sub> | 664.2884 | 665.2962 | R = H. R <sub>1</sub> = Tg. R <sub>2</sub> = H. R <sub>3</sub> = (E)-CH <sub>3</sub> C=CHCH <sub>3</sub> . R <sub>4</sub> = H              | OC12C3([H])C(OC(/C(C)=C/C)=O)C(C2)(C)C(C([H])C(OC)=O)C1(C)C45C(C(C6(C)C([H])C5)=CC(OC6C7=COC=C7)=O)(O8)C3OC8(/C(C)=C/C)O4       |
| 170 | C <sub>39</sub> H <sub>42</sub> O <sub>11</sub> | 686.2727 | 687.2805 | R = H. R <sub>1</sub> = Bz. R <sub>2</sub> = H. R <sub>3</sub> = (E)-CH <sub>3</sub> C=CHCH <sub>3</sub> . R <sub>4</sub> = H              | OC12C3([H])C(OC(C4=CC=CC=C4)=O)C(C2)(C)C(C([H])C(OC)=O)C1(C)C56C(C(C7(C)C([H])C6)=CC(OC7C8=COC=C8)=O)(O9)C3OC9(/C(C)=C/C)O5     |
| 171 | C <sub>39</sub> H <sub>46</sub> O <sub>13</sub> | 722.2938 | 723.3017 | R = OAc. R <sub>1</sub> = Tg. R <sub>2</sub> = H. R <sub>3</sub> = (E)-CH <sub>3</sub> C=CHCH <sub>3</sub> . R <sub>4</sub> = H            | OC12C3([H])C(OC(/C(C)=C/C)=O)C(C2)(C)C(C(OC(C)=O)C(OC)=O)C1(C)C45C(C(C6(C)C([H])C5)=CC(OC6C7=COC=C7)=O)(O8)C3OC8(/C(C)=C/C)O4   |
| 172 | C <sub>41</sub> H <sub>44</sub> O <sub>13</sub> | 744.2782 | 745.2860 | R = OAc. R <sub>1</sub> = Bz. R <sub>2</sub> = H. R <sub>3</sub> = (E)-CH <sub>3</sub> C=CHCH <sub>3</sub> . R <sub>4</sub> = H            | OC12C3([H])C(OC(C4=CC=CC=C4)=O)C(C2)(C)C(C(OC(C)=O)C(OC)=O)C1(C)C56C(C(C7(C)C([H])C6)=CC(OC7C8=COC=C8)=O)(O9)C3OC9(/C(C)=C/C)O5 |
| 173 | C <sub>39</sub> H <sub>46</sub> O <sub>13</sub> | 722.2938 | 723.3017 | R = H. R <sub>1</sub> = Tg. R <sub>2</sub> = H. R <sub>3</sub> = (E)-CH <sub>3</sub> C=CHCH <sub>3</sub> . R <sub>4</sub> = OAc            | OC12C3([H])C(OC(/C(C)=C/C)=O)C(C2)(C)C(C([H])C(OC)=O)C1(C)C45C(C(C6(C)                                                          |

|     |                                                 |          |          |                                                                                                                                   |  |                                                                                                                                                  |
|-----|-------------------------------------------------|----------|----------|-----------------------------------------------------------------------------------------------------------------------------------|--|--------------------------------------------------------------------------------------------------------------------------------------------------|
|     |                                                 |          |          |                                                                                                                                   |  | <chem>C(OC(C)=O)C5)=CC(OC6C7=COC=C7)=O)(O8)C3OC8(/C(C)=C/C)O4</chem>                                                                             |
| 174 | C <sub>41</sub> H <sub>44</sub> O <sub>13</sub> | 744.2782 | 745.2860 | R = H. R <sub>1</sub> = Bz. R <sub>2</sub> = H. R <sub>3</sub> = (E)-CH <sub>3</sub> C=CHCH <sub>3</sub> . R <sub>4</sub> = OAc   |  | <chem>OC12C3([H])C(OC(C4=CC=CC=C4)=O)C(C2)(C)C(C([H])C(OC)=O)C1(C)C56C(C(C7(C)C(OC(C)=O)C6)=CC(OC7C8=COC=C8)=O)(O9)C3OC9(/C(C)=C/C)O5</chem>     |
| 175 | C <sub>41</sub> H <sub>48</sub> O <sub>15</sub> | 780.2993 | 781.3071 | R = OAc. R <sub>1</sub> = Tg. R <sub>2</sub> = H. R <sub>3</sub> = (E)-CH <sub>3</sub> C=CHCH <sub>3</sub> . R <sub>4</sub> = OAc |  | <chem>OC12C3([H])C(OC(/C(C)=C/C)=O)C(C2)(C)C(C(OC(C)=O)C(OC)=O)C1(C)C45C(C(C6(C)C(OC(C)=O)C5)=CC(OC6C7=COC=C7)=O)(O8)C3OC8(/C(C)=C/C)O4</chem>   |
| 176 | C <sub>43</sub> H <sub>46</sub> O <sub>15</sub> | 802.2837 | 803.2915 | R = OAc. R <sub>1</sub> = Bz. R <sub>2</sub> = H. R <sub>3</sub> = (E)-CH <sub>3</sub> C=CHCH <sub>3</sub> . R <sub>4</sub> = OAc |  | <chem>OC12C3([H])C(OC(C4=CC=CC=C4)=O)C(C2)(C)C(C(OC(C)=O)C(OC)=O)C1(C)C56C(C(C7(C)C(OC(C)=O)C6)=CC(OC7C8=COC=C8)=O)(O9)C3OC9(/C(C)=C/C)O5</chem> |
| 177 | C <sub>37</sub> H <sub>44</sub> O <sub>12</sub> | 680.2833 | 681.2911 | R = H. R <sub>1</sub> = Tg. R <sub>2</sub> = H. R <sub>3</sub> = (E)-CH <sub>3</sub> C=CHCH <sub>3</sub> . R <sub>4</sub> = OH    |  | <chem>OC12C3([H])C(OC(/C(C)=C/C)=O)C(C2)(C)C(C([H])C(OC)=O)C1(C)C45C(C(C6(C)C(O)C5)=CC(OC6C7=COC=C7)=O)(O8)C3OC8(/C(C)=C/C)O4</chem>             |
| 178 | C <sub>39</sub> H <sub>42</sub> O <sub>12</sub> | 702.2676 | 703.2755 | R = H. R <sub>1</sub> = Bz. R <sub>2</sub> = H. R <sub>3</sub> = (E)-CH <sub>3</sub> C=CHCH <sub>3</sub> . R <sub>4</sub> = OH    |  | <chem>OC12C3([H])C(OC(C4=CC=CC=C4)=O)C(C2)(C)C(C([H])C(OC)=O)C1(C)C56C(C(C7(C)C(O)C6)=CC(OC7C8=COC=C8)=O)(O9)C3OC9(/C(C)=C/C)O5</chem>           |

|     |                                                 |          |          |                                                                                                                                     |                                                                                                                               |
|-----|-------------------------------------------------|----------|----------|-------------------------------------------------------------------------------------------------------------------------------------|-------------------------------------------------------------------------------------------------------------------------------|
| 179 | C <sub>39</sub> H <sub>46</sub> O <sub>14</sub> | 738.2888 | 739.2966 | R = OAc. R <sub>1</sub> = Tg. R <sub>2</sub> = H. R <sub>3</sub> = (E)-CH <sub>3</sub> C=CHCH <sub>3</sub> .<br>R <sub>4</sub> = OH | OC12C3([H])C(OC(/C(C)=C/C)=O)C(C2)(C)C(C(OC(C)=O)C(OC)=O)C1(C)C45C(C(C6(C)C(O)C5)=CC(OC6C7=COC=C7)=O)(O8)C3OC8(/C(C)=C/C)O4   |
| 180 | C <sub>41</sub> H <sub>44</sub> O <sub>14</sub> | 760.2731 | 761.2809 | R = OAc. R <sub>1</sub> = Bz. R <sub>2</sub> = H. R <sub>3</sub> = (E)-CH <sub>3</sub> C=CHCH <sub>3</sub> . R <sub>4</sub> = OH    | OC12C3([H])C(OC(C4=CC=CC=C4)=O)C(C2)(C)C(C(OC(C)=O)C(OC)=O)C1(C)C56C(C(C7(C)C(O)C6)=CC(OC7C8=COC=C8)=O)(O9)C3OC9(/C(C)=C/C)O5 |
| 181 | C <sub>34</sub> H <sub>40</sub> O <sub>13</sub> | 656.2469 | 657.2547 | R = OH. R <sub>1</sub> = Tg. R <sub>2</sub> = OH. R <sub>3</sub> = CH <sub>3</sub> . R <sub>4</sub> = H                             | OC12C3(O)C(OC(/C(C)=C/C)=O)C(C2)(C)C(C(O)C(OC)=O)C1(C)C45C(C(C6(C)C([H])C5)=CC(OC6C7=COC=C7)=O)(O8)C3OC8(C)O4                 |
| 182 | C <sub>36</sub> H <sub>38</sub> O <sub>13</sub> | 678.2312 | 679.2391 | R = OH. R <sub>1</sub> = Bz. R <sub>2</sub> = OH. R <sub>3</sub> = CH <sub>3</sub> . R <sub>4</sub> = H                             | OC12C3(O)C(OC(C4=CC=CC=C4)=O)C(C2)(C)C(C(O)C(OC)=O)C1(C)C56C(C(C7(C)C([H])C6)=CC(OC7C8=COC=C8)=O)(O9)C3OC9(C)O5               |
| 183 | C <sub>36</sub> H <sub>42</sub> O <sub>14</sub> | 698.2575 | 699.2653 | R = OH. R <sub>1</sub> = Tg. R <sub>2</sub> = OAc. R <sub>3</sub> = CH <sub>3</sub> . R <sub>4</sub> = H                            | OC12C3(OC(C)=O)C(OC(/C(C)=C/C)=O)C(C2)(C)C(C(O)C(OC)=O)C1(C)C45C(C(C6(C)C([H])C5)=CC(OC6C7=COC=C7)=O)(O8)C3OC8(C)O4           |
| 184 | C <sub>38</sub> H <sub>40</sub> O <sub>14</sub> | 720.2418 | 721.2496 | R = OH. R <sub>1</sub> = Bz. R <sub>2</sub> = OAc. R <sub>3</sub> = CH <sub>3</sub> . R <sub>4</sub> = H                            | OC12C3(OC(C)=O)C(OC(C4=CC=CC=C4)=O)C(C2)(C)C(C(O)C(OC)=O)C1(C)C56C(C                                                          |

|     |                                                 |          |          |                                                                                                                         |                                                                                                                                        |
|-----|-------------------------------------------------|----------|----------|-------------------------------------------------------------------------------------------------------------------------|----------------------------------------------------------------------------------------------------------------------------------------|
|     |                                                 |          |          |                                                                                                                         | <chem>C(C7(C)C([H])C6)=CC(OC7C8=COC=C8)=O)(O9)C3OC9(C)O5</chem>                                                                        |
| 185 | C <sub>36</sub> H <sub>42</sub> O <sub>15</sub> | 714.2524 | 715.2602 | R = OH. R <sub>1</sub> = Tg. R <sub>2</sub> = OH. R <sub>3</sub> = CH <sub>3</sub> . R <sub>4</sub> = OAc               | <chem>OC12C3(O)C(OC(/C(C)=C/C)=O)C(C2)(C)C(C(O)C(OC)=O)C1(C)C45C(C(C6(C)C(O)C(C)=O)C5)=CC(OC6C7=COC=C7)=O)(O8)C3OC8(C)O4</chem>        |
| 186 | C <sub>38</sub> H <sub>40</sub> O <sub>15</sub> | 736.2367 | 737.2445 | R = OH. R <sub>1</sub> = Bz. R <sub>2</sub> = OH. R <sub>3</sub> = CH <sub>3</sub> . R <sub>4</sub> = OAc               | <chem>OC12C3(O)C(OC(C4=CC=CC=C4)=O)C(C2)(C)C(C(O)C(OC)=O)C1(C)C56C(C(C7(C)C(OC(C)=O)C6)=CC(OC7C8=COC=C8)=O)(O9)C3OC9(C)O5</chem>       |
| 187 | C <sub>38</sub> H <sub>44</sub> O <sub>16</sub> | 756.2629 | 757.2708 | R = OH. R <sub>1</sub> = Tg. R <sub>2</sub> = OAc. R <sub>3</sub> = CH <sub>3</sub> . R <sub>4</sub> = OAc              | <chem>OC12C3(OC(C)=O)C(OC(/C(C)=C/C)=O)C(C2)(C)C(C(O)C(OC)=O)C1(C)C45C(C(C6(C)C(OC(C)=O)C5)=CC(OC6C7=COC=C7)=O)(O8)C3OC8(C)O4</chem>   |
| 188 | C <sub>40</sub> H <sub>42</sub> O <sub>16</sub> | 778.2473 | 779.2551 | R = OH. R <sub>1</sub> = Bz. R <sub>2</sub> = OAc. R <sub>3</sub> = CH <sub>3</sub> . R <sub>4</sub> = OAc              | <chem>OC12C3(OC(C)=O)C(OC(C4=CC=CC=C4)=O)C(C2)(C)C(C(O)C(OC)=O)C1(C)C56C(C(C7(C)C(OC(C)=O)C6)=CC(OC7C8=COC=C8)=O)(O9)C3OC9(C)O5</chem> |
| 189 | C <sub>35</sub> H <sub>42</sub> O <sub>13</sub> | 670.2625 | 671.2704 | R = OH. R <sub>1</sub> = Tg. R <sub>2</sub> = OH. R <sub>3</sub> = CH <sub>2</sub> CH <sub>3</sub> . R <sub>4</sub> = H | <chem>OC12C3(O)C(OC(/C(C)=C/C)=O)C(C2)(C)C(C(O)C(OC)=O)C1(C)C45C(C(C6(C)C([H])C5)=CC(OC6C7=COC=C7)=O)(O8)C3OC8(CC)O4</chem>            |



|     |                                                 |          |          |                                                                                                                            |                                                                                                                        |
|-----|-------------------------------------------------|----------|----------|----------------------------------------------------------------------------------------------------------------------------|------------------------------------------------------------------------------------------------------------------------|
| 190 | C <sub>37</sub> H <sub>40</sub> O <sub>13</sub> | 692.2469 | 693.2547 | R = OH. R <sub>1</sub> = Bz. R <sub>2</sub> = OH. R <sub>3</sub> = CH <sub>2</sub> CH <sub>3</sub> . R <sub>4</sub> = H    | OC12C3(O)C(OC(C4=CC=CC=C4)=O)C(C2)(C)C(C(O)C(OC)=O)C1(C)C56C(C(C7(C)C([H])C6)=CC(OC7C8=COC=C8)=O)(O9)C3OC9(CC)O5       |
| 191 | C <sub>37</sub> H <sub>44</sub> O <sub>14</sub> | 712.2731 | 713.2809 | R = OH. R <sub>1</sub> = Tg. R <sub>2</sub> = OAc. R <sub>3</sub> = CH <sub>2</sub> CH <sub>3</sub> . R <sub>4</sub> = H   | OC12C3(OC(C)=O)C(OC(/C(C)=C/C)=O)C(C2)(C)C(C(O)C(OC)=O)C1(C)C45C(C(C6(C)C([H])C5)=CC(OC6C7=COC=C7)=O)(O8)C3OC8(CC)O4   |
| 192 | C <sub>39</sub> H <sub>42</sub> O <sub>14</sub> | 734.2575 | 735.2653 | R = OH. R <sub>1</sub> = Bz. R <sub>2</sub> = OAc. R <sub>3</sub> = CH <sub>2</sub> CH <sub>3</sub> . R <sub>4</sub> = H   | OC12C3(OC(C)=O)C(OC(C4=CC=CC=C4)=O)C(C2)(C)C(C(O)C(OC)=O)C1(C)C56C(C(C7(C)C([H])C6)=CC(OC7C8=COC=C8)=O)(O9)C3OC9(CC)O5 |
| 193 | C <sub>37</sub> H <sub>44</sub> O <sub>15</sub> | 728.2680 | 729.2758 | R = OH. R <sub>1</sub> = Tg. R <sub>2</sub> = OH. R <sub>3</sub> = CH <sub>2</sub> CH <sub>3</sub> . R <sub>4</sub> = OAc  | OC12C3(O)C(OC(/C(C)=C/C)=O)C(C2)(C)C(C(O)C(OC)=O)C1(C)C45C(C(C6(C)C(O)C(C)=O)C5)=CC(OC6C7=COC=C7)=O)(O8)C3OC8(CC)O4    |
| 194 | C <sub>39</sub> H <sub>42</sub> O <sub>15</sub> | 750.2524 | 751.2602 | R = OH. R <sub>1</sub> = Bz. R <sub>2</sub> = OH. R <sub>3</sub> = CH <sub>2</sub> CH <sub>3</sub> . R <sub>4</sub> = OAc  | OC12C3(O)C(OC(C4=CC=CC=C4)=O)C(C2)(C)C(C(O)C(OC)=O)C1(C)C56C(C(C7(C)C(OC(C)=O)C6)=CC(OC7C8=COC=C8)=O)(O9)C3OC9(CC)O5   |
| 195 | C <sub>39</sub> H <sub>46</sub> O <sub>16</sub> | 770.2786 | 771.2864 | R = OH. R <sub>1</sub> = Tg. R <sub>2</sub> = OAc. R <sub>3</sub> = CH <sub>2</sub> CH <sub>3</sub> . R <sub>4</sub> = OAc | OC12C3(OC(C)=O)C(OC(/C(C)=C/C)=O)C(C2)(C)C(C(O)C(OC)=O)C1(C)C45C(C(                                                    |

|     |                                                 |          |          |                                                                                                                            |                                                                                                                                           |
|-----|-------------------------------------------------|----------|----------|----------------------------------------------------------------------------------------------------------------------------|-------------------------------------------------------------------------------------------------------------------------------------------|
|     |                                                 |          |          |                                                                                                                            | <chem>C6(C)C(OC(C)=O)C5)=CC(OC6C7=COC=C7)=O)(O8)C3OC8(CC)O4</chem>                                                                        |
| 196 | C <sub>41</sub> H <sub>44</sub> O <sub>16</sub> | 792.2629 | 793.2708 | R = OH. R <sub>1</sub> = Bz. R <sub>2</sub> = OAc. R <sub>3</sub> = CH <sub>2</sub> CH <sub>3</sub> . R <sub>4</sub> = OAc | <chem>OC12C3(OC(C)=O)C(OC(C4=CC=CC=C4)=O)C(C2)(C)C(C(O)C(OC)=O)C1(C)C56C(C(C7(C)C(OC(C)=O)C6)=CC(OC7C8=CO=C8)=O)(O9)C3OC9(CC)O5</chem>    |
| 197 | C <sub>36</sub> H <sub>44</sub> O <sub>13</sub> | 684.2782 | 685.2860 | R = OH. R <sub>1</sub> = Tg. R <sub>2</sub> = OH. R <sub>3</sub> = CH(CH <sub>3</sub> ) <sub>2</sub> . R <sub>4</sub> = H  | <chem>OC12C3(O)C(OC(/C(C)=C/C)=O)C(C2)(C)C(C(O)C(OC)=O)C1(C)C45C(C(C6(C)C([H]))C5)=CC(OC6C7=COC=C7)=O)(O8)C3OC8(C(C)C)O4</chem>           |
| 198 | C <sub>38</sub> H <sub>42</sub> O <sub>13</sub> | 706.2625 | 707.2704 | R = OH. R <sub>1</sub> = Bz. R <sub>2</sub> = OH. R <sub>3</sub> = CH(CH <sub>3</sub> ) <sub>2</sub> . R <sub>4</sub> = H  | <chem>OC12C3(O)C(OC(C4=CC=CC=C4)=O)C(C2)(C)C(C(O)C(OC)=O)C1(C)C56C(C(C7(C)C([H]))C6)=CC(OC7C8=COC=C8)=O)(O9)C3OC9(C(C)C)O5</chem>         |
| 199 | C <sub>38</sub> H <sub>46</sub> O <sub>14</sub> | 726.2888 | 727.2966 | R = OH. R <sub>1</sub> = Tg. R <sub>2</sub> = OAc. R <sub>3</sub> = CH(CH <sub>3</sub> ) <sub>2</sub> . R <sub>4</sub> = H | <chem>OC12C3(OC(C)=O)C(OC(/C(C)=C/C)=O)C(C2)(C)C(C(C(O)C(OC)=O)C1(C)C45C(C(C6(C)C([H]))C5)=CC(OC6C7=COC=C7)=O)(O8)C3OC8(C(C)C)O4</chem>   |
| 200 | C <sub>40</sub> H <sub>44</sub> O <sub>14</sub> | 748.2731 | 749.2809 | R = OH. R <sub>1</sub> = Bz. R <sub>2</sub> = OAc. R <sub>3</sub> = CH(CH <sub>3</sub> ) <sub>2</sub> . R <sub>4</sub> = H | <chem>OC12C3(OC(C)=O)C(OC(C4=CC=CC=C4)=O)C(C2)(C)C(C(C(O)C(OC)=O)C1(C)C56C(C(C7(C)C([H]))C6)=CC(OC7C8=COC=C8)=O)(O9)C3OC9(C(C)C)O5</chem> |

|     |                                                 |          |          |                                                                                                                                           |                                                                                                                               |
|-----|-------------------------------------------------|----------|----------|-------------------------------------------------------------------------------------------------------------------------------------------|-------------------------------------------------------------------------------------------------------------------------------|
| 201 | C <sub>38</sub> H <sub>46</sub> O <sub>15</sub> | 742.2837 | 743.2915 | R = OH. R <sub>1</sub> = Tg. R <sub>2</sub> = OH. R <sub>3</sub> = CH(CH <sub>3</sub> ) <sub>2</sub> . R <sub>4</sub> = OAc               | OC12C3(O)C(OC(/C(C)=C/C)=O)C(C2)(C)C(C(O)C(OC)=O)C1(C)C45C(C(C6(C)C(O)C(C)=O)C5)=CC(OC6C7=COC=C7)=O)(O8)C3OC8(C(C)C)O4        |
| 202 | C <sub>40</sub> H <sub>44</sub> O <sub>15</sub> | 764.2680 | 765.2758 | R = OH. R <sub>1</sub> = Bz. R <sub>2</sub> = OH. R <sub>3</sub> = CH(CH <sub>3</sub> ) <sub>2</sub> . R <sub>4</sub> = OAc               | OC12C3(O)C(OC(C4=CC=CC=C4)=O)C(C2)(C)C(C(O)C(OC)=O)C1(C)C56C(C(C7(C)C(OC(C)=O)C6)=CC(OC7C8=COC=C8)=O)(O9)C3OC9(C(C)C)O5       |
| 203 | C <sub>40</sub> H <sub>48</sub> O <sub>16</sub> | 784.2942 | 785.3021 | R = OH. R <sub>1</sub> = Tg. R <sub>2</sub> = OAc. R <sub>3</sub> = CH(CH <sub>3</sub> ) <sub>2</sub> . R <sub>4</sub> = OAc              | OC12C3(OC(C)=O)C(OC(/C(C)=C/C)=O)C(C2)(C)C(C(O)C(OC)=O)C1(C)C45C(C(C6(C)C(OC(C)=O)C5)=CC(OC6C7=COC=C7)=O)(O8)C3OC8(C(C)C)O4   |
| 204 | C <sub>42</sub> H <sub>46</sub> O <sub>16</sub> | 806.2786 | 807.2864 | R = OH. R <sub>1</sub> = Bz. R <sub>2</sub> = OAc. R <sub>3</sub> = CH(CH <sub>3</sub> ) <sub>2</sub> . R <sub>4</sub> = OAc              | OC12C3(OC(C)=O)C(OC(C4=CC=CC=C4)=O)C(C2)(C)C(C(O)C(OC)=O)C1(C)C56C(C(C7(C)C(OC(C)=O)C6)=CC(OC7C8=COC=C8)=O)(O9)C3OC9(C(C)C)O5 |
| 205 | C <sub>37</sub> H <sub>46</sub> O <sub>13</sub> | 698.2938 | 699.3017 | R = OH. R <sub>1</sub> = Tg. R <sub>2</sub> = OH. R <sub>3</sub> = CH <sub>3</sub> CHCH <sub>2</sub> CH <sub>3</sub> . R <sub>4</sub> = H | OC12C3(O)C(OC(/C(C)=C/C)=O)C(C2)(C)C(C(O)C(OC)=O)C1(C)C45C(C(C6(C)C([H])C5)=CC(OC6C7=COC=C7)=O)(O8)C3OC8(C(C)CC)O4            |
| 206 | C <sub>39</sub> H <sub>44</sub> O <sub>13</sub> | 720.2782 | 721.2860 | R = OH. R <sub>1</sub> = Bz. R <sub>2</sub> = OH. R <sub>3</sub> = CH <sub>3</sub> CHCH <sub>2</sub> CH <sub>3</sub> . R <sub>4</sub> = H | OC12C3(O)C(OC(C4=CC=CC=C4)=O)C(C2)(C)C(C(O)C(OC)=O)C1(C)C56C(C(C7(C                                                           |

[1]

|     |                                                 |          |          |                                                                                                                                              |                                                                                                                                           |
|-----|-------------------------------------------------|----------|----------|----------------------------------------------------------------------------------------------------------------------------------------------|-------------------------------------------------------------------------------------------------------------------------------------------|
|     |                                                 |          |          |                                                                                                                                              | <chem>)C([H])C6=CC(OC7C8=COC=C8)=O)(O9)C3OC9(C(C)CC)O5</chem>                                                                             |
| 207 | C <sub>39</sub> H <sub>48</sub> O <sub>14</sub> | 740.3044 | 741.3122 | R = OH. R <sub>1</sub> = Tg. R <sub>2</sub> = OAc. R <sub>3</sub> = CH <sub>3</sub> CHCH <sub>2</sub> CH <sub>3</sub> . R <sub>4</sub> = H   | <chem>OC12C3(OC(C)=O)C(OC(/C(C)=C/C)=O)C(C2)(C)C(C(O)C(OC)=O)C1(C)C45C(C(C6(C)C([H])C5)=CC(OC6C7=COC=C7)=O)(O8)C3OC8(C(C)CC)O4</chem>     |
| 208 | C <sub>41</sub> H <sub>46</sub> O <sub>14</sub> | 762.2888 | 763.2966 | R = OH. R <sub>1</sub> = Bz. R <sub>2</sub> = OAc. R <sub>3</sub> = CH <sub>3</sub> CHCH <sub>2</sub> CH <sub>3</sub> . R <sub>4</sub> = H   | <chem>OC12C3(OC(C)=O)C(OC(C4=CC=CC=C4)=O)C(C2)(C)C(C(O)C(OC)=O)C1(C)C56C(C(C7(C)C([H])C6)=CC(OC7C8=COC=C8)=O)(O9)C3OC9(C(C)CC)O5</chem>   |
| 209 | C <sub>39</sub> H <sub>48</sub> O <sub>15</sub> | 756.2993 | 757.3071 | R = OH. R <sub>1</sub> = Tg. R <sub>2</sub> = OH. R <sub>3</sub> = CH <sub>3</sub> CHCH <sub>2</sub> CH <sub>3</sub> . R <sub>4</sub> = OAc  | <chem>OC12C3(O)C(OC(/C(C)=C/C)=O)C(C2)(C)C(C(O)C(OC)=O)C1(C)C45C(C(C6(C)C(O)C(C)=O)C5)=CC(OC6C7=COC=C7)=O)(O8)C3OC8(C(C)CC)O4</chem>      |
| 210 | C <sub>41</sub> H <sub>46</sub> O <sub>15</sub> | 778.2837 | 779.2915 | R = OH. R <sub>1</sub> = Bz. R <sub>2</sub> = OH. R <sub>3</sub> = CH <sub>3</sub> CHCH <sub>2</sub> CH <sub>3</sub> . R <sub>4</sub> = OAc  | <chem>OC12C3(O)C(OC(C4=CC=CC=C4)=O)C(C2)(C)C(C(O)C(OC)=O)C1(C)C56C(C(C7(C)C(OC(C)=O)C6)=CC(OC7C8=COC=C8)=O)(O9)C3OC9(C(C)CC)O5</chem>     |
| 211 | C <sub>41</sub> H <sub>50</sub> O <sub>16</sub> | 798.3099 | 799.3177 | R = OH. R <sub>1</sub> = Tg. R <sub>2</sub> = OAc. R <sub>3</sub> = CH <sub>3</sub> CHCH <sub>2</sub> CH <sub>3</sub> . R <sub>4</sub> = OAc | <chem>OC12C3(OC(C)=O)C(OC(/C(C)=C/C)=O)C(C2)(C)C(C(O)C(OC)=O)C1(C)C45C(C(C6(C)C(OC(C)=O)C5)=CC(OC6C7=COC=C7)=O)(O8)C3OC8(C(C)CC)O4</chem> |

|     |                                                 |          |          |                                                                                                                                              |                                                                                                                                 |
|-----|-------------------------------------------------|----------|----------|----------------------------------------------------------------------------------------------------------------------------------------------|---------------------------------------------------------------------------------------------------------------------------------|
| 212 | C <sub>43</sub> H <sub>48</sub> O <sub>16</sub> | 820.2942 | 821.3021 | R = OH. R <sub>1</sub> = Bz. R <sub>2</sub> = OAc. R <sub>3</sub> = CH <sub>3</sub> CHCH <sub>2</sub> CH <sub>3</sub> . R <sub>4</sub> = OAc | OC12C3(OC(C)=O)C(OC(C4=CC=CC=C4)=O)C(C2)(C)C(C(O)C(OC)=O)C1(C)C56C(C(C7(C)C(OC(C)=O)C6)=CC(OC7C8=CO C=C8)=O)(O9)C3OC9(C(C)CC)O5 |
| 213 | C <sub>37</sub> H <sub>44</sub> O <sub>13</sub> | 696.2782 | 697.2860 | R = OH. R <sub>1</sub> = Tg. R <sub>2</sub> = OH. R <sub>3</sub> = (E)-CH <sub>3</sub> C=CHCH <sub>3</sub> . R <sub>4</sub> = H              | OC12C3(O)C(OC(/C(C)=C/C)=O)C(C2)(C)C(C(O)C(OC)=O)C1(C)C45C(C(C6(C)C([H])C5)=CC(OC6C7=COC=C7)=O)(O8)C3OC8(/C(C)=C/C)O4           |
| 214 | C <sub>39</sub> H <sub>42</sub> O <sub>13</sub> | 718.2625 | 719.2704 | R = OH. R <sub>1</sub> = Bz. R <sub>2</sub> = OH. R <sub>3</sub> = (E)-CH <sub>3</sub> C=CHCH <sub>3</sub> . R <sub>4</sub> = H              | OC12C3(O)C(OC(C4=CC=CC=C4)=O)C(C2)(C)C(C(O)C(OC)=O)C1(C)C56C(C(C7(C)C([H])C6)=CC(OC7C8=COC=C8)=O)(O9)C3OC9(/C(C)=C/C)O5         |
| 215 | C <sub>39</sub> H <sub>46</sub> O <sub>14</sub> | 738.2888 | 739.2966 | R = OH. R <sub>1</sub> = Tg. R <sub>2</sub> = OAc. R <sub>3</sub> = (E)-CH <sub>3</sub> C=CHCH <sub>3</sub> . R <sub>4</sub> = H             | OC12C3(OC(C)=O)C(OC(/C(C)=C/C)=O)C(C2)(C)C(C(O)C(OC)=O)C1(C)C45C(C(C6(C)C([H])C5)=CC(OC6C7=COC=C7)=O)(O8)C3OC8(/C(C)=C/C)O4     |
| 216 | C <sub>41</sub> H <sub>44</sub> O <sub>14</sub> | 760.2731 | 761.2809 | R = OH. R <sub>1</sub> = Bz. R <sub>2</sub> = OAc. R <sub>3</sub> = (E)-CH <sub>3</sub> C=CHCH <sub>3</sub> . R <sub>4</sub> = H             | OC12C3(OC(C)=O)C(OC(C4=CC=CC=C4)=O)C(C2)(C)C(C(O)C(OC)=O)C1(C)C56C(C(C7(C)C([H])C6)=CC(OC7C8=COC=C8)=O)(O9)C3OC9(/C(C)=C/C)O5   |
| 217 | C <sub>39</sub> H <sub>46</sub> O <sub>15</sub> | 754.2837 | 755.2915 | R = OH. R <sub>1</sub> = Tg. R <sub>2</sub> = OH. R <sub>3</sub> = (E)-CH <sub>3</sub> C=CHCH <sub>3</sub> . R <sub>4</sub> = OAc            | OC12C3(O)C(OC(/C(C)=C/C)=O)C(C2)(C)C(C(O)C(OC)=O)C1(C)C45C(C(C6(C)C(O                                                           |

|     |                                                 |          |          |                                                                                                                                       |                                                                                                                                                 |
|-----|-------------------------------------------------|----------|----------|---------------------------------------------------------------------------------------------------------------------------------------|-------------------------------------------------------------------------------------------------------------------------------------------------|
|     |                                                 |          |          |                                                                                                                                       | <chem>C(C)=O)C5)=CC(OC6C7=COC=C7)=O)(O8)C3OC8(/C(C)=C/C)O4</chem>                                                                               |
| 218 | C <sub>41</sub> H <sub>44</sub> O <sub>15</sub> | 776.2680 | 777.2758 | R = OH. R <sub>1</sub> = Bz. R <sub>2</sub> = OH. R <sub>3</sub> = (E)-CH <sub>3</sub> C=CHCH <sub>3</sub> .<br>R <sub>4</sub> = OAc  | <chem>OC12C3(O)C(OC(C4=CC=CC=C4)=O)C(C2)(C)C(C(O)C(OC)=O)C1(C)C56C(C(C7(C)C(OC(C)=O)C6)=CC(OC7C8=COC=C8)=O)(O9)C3OC9(/C(C)=C/C)O5</chem>        |
| 219 | C <sub>41</sub> H <sub>48</sub> O <sub>16</sub> | 796.2942 | 797.3021 | R = OH. R <sub>1</sub> = Tg. R <sub>2</sub> = OAc. R <sub>3</sub> = (E)-CH <sub>3</sub> C=CHCH <sub>3</sub> .<br>R <sub>4</sub> = OAc | <chem>OC12C3(OC(C)=O)C(OC(/C(C)=C/C)=O)C(C2)(C)C(C(O)C(OC)=O)C1(C)C45C(C(C6(C)C(OC(C)=O)C5)=CC(OC6C7=COC=C7)=O)(O8)C3OC8(/C(C)=C/C)O4</chem>    |
| 220 | C <sub>43</sub> H <sub>46</sub> O <sub>16</sub> | 818.2786 | 819.2864 | R = OH. R <sub>1</sub> = Bz. R <sub>2</sub> = OAc. R <sub>3</sub> = (E)-CH <sub>3</sub> C=CHCH <sub>3</sub> .<br>R <sub>4</sub> = OAc | <chem>OC12C3(OC(C)=O)C(OC(C4=CC=CC=C4)=O)C(C2)(C)C(C(O)C(OC)=O)C1(C)C56C(C(C7(C)C(OC(C)=O)C6)=CC(OC7C8=CO C=C8)=O)(O9)C3OC9(/C(C)=C/C)O5</chem> |
| 221 | C <sub>34</sub> H <sub>40</sub> O <sub>14</sub> | 672.2418 | 673.2496 | R = OH. R <sub>1</sub> = Tg. R <sub>2</sub> = OH. R <sub>3</sub> = CH <sub>3</sub> . R <sub>4</sub> = OH                              | <chem>OC12C3(O)C(OC(/C(C)=C/C)=O)C(C2)(C)C(C(O)C(OC)=O)C1(C)C45C(C(C6(C)C(O)C5)=CC(OC6C7=COC=C7)=O)(O8)C3OC8(C)O4</chem>                        |
| 222 | C <sub>36</sub> H <sub>38</sub> O <sub>14</sub> | 694.2262 | 695.2340 | R = OH. R <sub>1</sub> = Bz. R <sub>2</sub> = OH. R <sub>3</sub> = CH <sub>3</sub> . R <sub>4</sub> = OH                              | <chem>OC12C3(O)C(OC(C4=CC=CC=C4)=O)C(C2)(C)C(C(O)C(OC)=O)C1(C)C56C(C(C7(C)C(O)C6)=CC(OC7C8=COC=C8)=O)(O9)C3OC9(C)O5</chem>                      |

|     |                                                 |          |          |                                                                                                                           |                                                                                                                      |
|-----|-------------------------------------------------|----------|----------|---------------------------------------------------------------------------------------------------------------------------|----------------------------------------------------------------------------------------------------------------------|
| 223 | C <sub>36</sub> H <sub>42</sub> O <sub>15</sub> | 714.2524 | 715.2602 | R = OH. R <sub>1</sub> = Tg. R <sub>2</sub> = OAc. R <sub>3</sub> = CH <sub>3</sub> . R <sub>4</sub> = OH                 | OC12C3(OC(C)=O)C(OC(/C(C)=C/C)=O)C(C2)(C)C(C(O)C(OC)=O)C1(C)C45C(C(C6(C)C(O)C5)=CC(OC6C7=COC=C7)=O)(O8)C3OC8(C)O4    |
| 224 | C <sub>38</sub> H <sub>40</sub> O <sub>15</sub> | 736.2367 | 737.2445 | R = OH. R <sub>1</sub> = Bz. R <sub>2</sub> = OAc. R <sub>3</sub> = CH <sub>3</sub> . R <sub>4</sub> = OH                 | OC12C3(OC(C)=O)C(OC(C4=CC=CC=C4)=O)C(C2)(C)C(C(O)C(OC)=O)C1(C)C56C(C(C7(C)C(O)C6)=CC(OC7C8=COC=C8)=O)(O9)C3OC9(C)O5  |
| 225 | C <sub>35</sub> H <sub>42</sub> O <sub>14</sub> | 686.2575 | 687.2653 | R = OH. R <sub>1</sub> = Tg. R <sub>2</sub> = OH. R <sub>3</sub> = CH <sub>2</sub> CH <sub>3</sub> . R <sub>4</sub> = OH  | OC12C3(O)C(OC(/C(C)=C/C)=O)C(C2)(C)C(C(O)C(OC)=O)C1(C)C45C(C(C6(C)C(O)C5)=CC(OC6C7=COC=C7)=O)(O8)C3OC8(CC)O4         |
| 226 | C <sub>37</sub> H <sub>40</sub> O <sub>14</sub> | 708.2418 | 709.2496 | R = OH. R <sub>1</sub> = Bz. R <sub>2</sub> = OH. R <sub>3</sub> = CH <sub>2</sub> CH <sub>3</sub> . R <sub>4</sub> = OH  | OC12C3(O)C(OC(C4=CC=CC=C4)=O)C(C2)(C)C(C(O)C(OC)=O)C1(C)C56C(C(C7(C)C(O)C6)=CC(OC7C8=COC=C8)=O)(O9)C3OC9(CC)O5       |
| 227 | C <sub>37</sub> H <sub>44</sub> O <sub>15</sub> | 728.2680 | 729.2758 | R = OH. R <sub>1</sub> = Tg. R <sub>2</sub> = OAc. R <sub>3</sub> = CH <sub>2</sub> CH <sub>3</sub> . R <sub>4</sub> = OH | OC12C3(OC(C)=O)C(OC(/C(C)=C/C)=O)C(C2)(C)C(C(O)C(OC)=O)C1(C)C45C(C(C6(C)C(O)C5)=CC(OC6C7=COC=C7)=O)(O8)C3OC8(CC)O4   |
| 228 | C <sub>39</sub> H <sub>42</sub> O <sub>15</sub> | 750.2524 | 751.2602 | R = OH. R <sub>1</sub> = Bz. R <sub>2</sub> = OAc. R <sub>3</sub> = CH <sub>2</sub> CH <sub>3</sub> . R <sub>4</sub> = OH | OC12C3(OC(C)=O)C(OC(C4=CC=CC=C4)=O)C(C2)(C)C(C(O)C(OC)=O)C1(C)C56C(C(C7(C)C(O)C6)=CC(OC7C8=COC=C8)=O)(O9)C3OC9(CC)O5 |

|     |                                                 |          |          |                                                                                                                                            |                                                                                                                                      |
|-----|-------------------------------------------------|----------|----------|--------------------------------------------------------------------------------------------------------------------------------------------|--------------------------------------------------------------------------------------------------------------------------------------|
|     |                                                 |          |          |                                                                                                                                            | <chem>C(C7(C)C(O)C6)=CC(OC7C8=COC=C8)=O)(O9)C3OC9(CC)O5</chem>                                                                       |
| 229 | C <sub>36</sub> H <sub>44</sub> O <sub>14</sub> | 700.2731 | 701.2809 | R = OH. R <sub>1</sub> = Tg. R <sub>2</sub> = OH. R <sub>3</sub> = CH(CH <sub>3</sub> ) <sub>2</sub> . R <sub>4</sub> = OH                 | <chem>OC12C3(O)C(OC(/C(C)=C/C)=O)C(C2)(C)C(C(O)C(OC)=O)C1(C)C45C(C(C6(C)C(O)C5)=CC(OC6C7=COC=C7)=O)(O8)C3OC8(C(C)C)O4</chem>         |
| 230 | C <sub>38</sub> H <sub>42</sub> O <sub>14</sub> | 722.2575 | 723.2653 | R = OH. R <sub>1</sub> = Bz. R <sub>2</sub> = OH. R <sub>3</sub> = CH(CH <sub>3</sub> ) <sub>2</sub> . R <sub>4</sub> = OH                 | <chem>OC12C3(O)C(OC(C4=CC=CC=C4)=O)C(C2)(C)C(C(O)C(OC)=O)C1(C)C56C(C(C7(C)C(O)C6)=CC(OC7C8=COC=C8)=O)(O9)C3OC9(C(C)C)O5</chem>       |
| 231 | C <sub>38</sub> H <sub>46</sub> O <sub>15</sub> | 742.2837 | 743.2915 | R = OH. R <sub>1</sub> = Tg. R <sub>2</sub> = OAc. R <sub>3</sub> = CH(CH <sub>3</sub> ) <sub>2</sub> . R <sub>4</sub> = OH                | <chem>OC12C3(OC(C)=O)C(OC(/C(C)=C/C)=O)C(C2)(C)C(C(O)C(OC)=O)C1(C)C45C(C(C6(C)C(O)C5)=CC(OC6C7=COC=C7)=O)(O8)C3OC8(C(C)C)O4</chem>   |
| 232 | C <sub>40</sub> H <sub>44</sub> O <sub>15</sub> | 764.2680 | 765.2758 | R = OH. R <sub>1</sub> = Bz. R <sub>2</sub> = OAc. R <sub>3</sub> = CH(CH <sub>3</sub> ) <sub>2</sub> . R <sub>4</sub> = OH                | <chem>OC12C3(OC(C)=O)C(OC(C4=CC=CC=C4)=O)C(C2)(C)C(C(O)C(OC)=O)C1(C)C56C(C(C7(C)C(O)C6)=CC(OC7C8=COC=C8)=O)(O9)C3OC9(C(C)C)O5</chem> |
| 233 | C <sub>37</sub> H <sub>46</sub> O <sub>14</sub> | 714.2888 | 715.2966 | R = OH. R <sub>1</sub> = Tg. R <sub>2</sub> = OH. R <sub>3</sub> = CH <sub>3</sub> CHCH <sub>2</sub> CH <sub>3</sub> . R <sub>4</sub> = OH | <chem>OC12C3(O)C(OC(/C(C)=C/C)=O)C(C2)(C)C(C(O)C(OC)=O)C1(C)C45C(C(C6(C)C(O)C5)=CC(OC6C7=COC=C7)=O)(O8)C3OC8(C(C)CC)O4</chem>        |



|     |                                                 |          |          |                                                                                                                                             |                                                                                                                          |
|-----|-------------------------------------------------|----------|----------|---------------------------------------------------------------------------------------------------------------------------------------------|--------------------------------------------------------------------------------------------------------------------------|
| 234 | C <sub>39</sub> H <sub>44</sub> O <sub>14</sub> | 736.2731 | 737.2809 | R = OH. R <sub>1</sub> = Bz. R <sub>2</sub> = OH. R <sub>3</sub> = CH <sub>3</sub> CHCH <sub>2</sub> CH <sub>3</sub> . R <sub>4</sub> = OH  | OC12C3(O)C(OC(C4=CC=CC=C4)=O)C(C2)(C)C(C(O)C(OC)=O)C1(C)C56C(C(C7(C)C(O)C6)=CC(OC7C8=COC=C8)=O)(O9)C3OC9(C(C)CC)O5       |
| 235 | C <sub>39</sub> H <sub>48</sub> O <sub>15</sub> | 756.2993 | 757.3071 | R = OH. R <sub>1</sub> = Tg. R <sub>2</sub> = OAc. R <sub>3</sub> = CH <sub>3</sub> CHCH <sub>2</sub> CH <sub>3</sub> . R <sub>4</sub> = OH | OC12C3(OC(C)=O)C(OC(/C(C)=C/C)=O)C(C2)(C)C(C(O)C(OC)=O)C1(C)C45C(C(C6(C)C(O)C5)=CC(OC6C7=COC=C7)=O)(O8)C3OC8(C(C)CC)O4   |
| 236 | C <sub>41</sub> H <sub>46</sub> O <sub>15</sub> | 778.2837 | 779.2915 | R = OH. R <sub>1</sub> = Bz. R <sub>2</sub> = OAc. R <sub>3</sub> = CH <sub>3</sub> CHCH <sub>2</sub> CH <sub>3</sub> . R <sub>4</sub> = OH | OC12C3(OC(C)=O)C(OC(C4=CC=CC=C4)=O)C(C2)(C)C(C(O)C(OC)=O)C1(C)C56C(C(C7(C)C(O)C6)=CC(OC7C8=COC=C8)=O)(O9)C3OC9(C(C)CC)O5 |
| 237 | C <sub>37</sub> H <sub>44</sub> O <sub>14</sub> | 712.2731 | 713.2809 | R = OH. R <sub>1</sub> = Tg. R <sub>2</sub> = OH. R <sub>3</sub> = (E)-CH <sub>3</sub> C=CHCH <sub>3</sub> . R <sub>4</sub> = OH            | OC12C3(O)C(OC(/C(C)=C/C)=O)C(C2)(C)C(C(O)C(OC)=O)C1(C)C45C(C(C6(C)C(O)C5)=CC(OC6C7=COC=C7)=O)(O8)C3OC8(/C(C)=C/C)O4      |
| 238 | C <sub>39</sub> H <sub>42</sub> O <sub>14</sub> | 734.2575 | 735.2653 | R = OH. R <sub>1</sub> = Bz. R <sub>2</sub> = OH. R <sub>3</sub> = (E)-CH <sub>3</sub> C=CHCH <sub>3</sub> . R <sub>4</sub> = OH            | OC12C3(O)C(OC(C4=CC=CC=C4)=O)C(C2)(C)C(C(O)C(OC)=O)C1(C)C56C(C(C7(C)C(O)C6)=CC(OC7C8=COC=C8)=O)(O9)C3OC9(/C(C)=C/C)O5    |
| 239 | C <sub>39</sub> H <sub>46</sub> O <sub>15</sub> | 754.2837 | 755.2915 | R = OH. R <sub>1</sub> = Tg. R <sub>2</sub> = OAc. R <sub>3</sub> = (E)-CH <sub>3</sub> C=CHCH <sub>3</sub> . R <sub>4</sub> = OH           | OC12C3(OC(C)=O)C(OC(/C(C)=C/C)=O)C(C2)(C)C(C(O)C(OC)=O)C1(C)C45C(C(                                                      |

|     |                                                 |          |          |                                                                                                                                      |                                                                                                                                          |
|-----|-------------------------------------------------|----------|----------|--------------------------------------------------------------------------------------------------------------------------------------|------------------------------------------------------------------------------------------------------------------------------------------|
|     |                                                 |          |          |                                                                                                                                      | <chem>C6(C)C(O)C5)=CC(OC6C7=COC=C7)=O)(O8)C3OC8(/C(C)=C/C)O4</chem>                                                                      |
| 240 | C <sub>41</sub> H <sub>44</sub> O <sub>15</sub> | 776.2680 | 777.2758 | R = OH. R <sub>1</sub> = Bz. R <sub>2</sub> = OAc. R <sub>3</sub> = (E)-CH <sub>3</sub> C=CHCH <sub>3</sub> .<br>R <sub>4</sub> = OH | <chem>OC12C3(OC(C)=O)C(OC(C4=CC=CC=C4)=O)C(C2)(C)C(C(O)C(OC)=O)C1(C)C56C(C(C7(C)C(O)C6)=CC(OC7C8=COC=C8)=O)(O9)C3OC9(/C(C)=C/C)O5</chem> |
| 241 | C <sub>34</sub> H <sub>40</sub> O <sub>12</sub> | 640.2520 | 641.2598 | R = OH. R <sub>1</sub> = Tg. R <sub>2</sub> = H. R <sub>3</sub> = CH <sub>3</sub> . R <sub>4</sub> = H                               | <chem>OC12C3([H])C(OC(/C(C)=C/C)=O)C(C2)(C)C(C(O)C(OC)=O)C1(C)C45C(C(C6(C)C([H])C5)=CC(OC6C7=COC=C7)=O)(O8)C3OC8(C)O4</chem>             |
| 242 | C <sub>36</sub> H <sub>38</sub> O <sub>12</sub> | 662.2363 | 663.2442 | R = OH. R <sub>1</sub> = Bz. R <sub>2</sub> = H. R <sub>3</sub> = CH <sub>3</sub> . R <sub>4</sub> = H                               | <chem>OC12C3([H])C(OC(C4=CC=CC=C4)=O)C(C2)(C)C(C(O)C(OC)=O)C1(C)C56C(C(C7(C)C([H])C6)=CC(OC7C8=COC=C8)=O)(O9)C3OC9(C)O5</chem>           |
| 243 | C <sub>36</sub> H <sub>42</sub> O <sub>14</sub> | 698.2575 | 699.2653 | R = OH. R <sub>1</sub> = Tg. R <sub>2</sub> = H. R <sub>3</sub> = CH <sub>3</sub> . R <sub>4</sub> = OAc                             | <chem>OC12C3([H])C(OC(/C(C)=C/C)=O)C(C2)(C)C(C(O)C(OC)=O)C1(C)C45C(C(C6(C)C(OC(C)=O)C5)=CC(OC6C7=COC=C7)=O)(O8)C3OC8(C)O4</chem>         |
| 244 | C <sub>38</sub> H <sub>40</sub> O <sub>14</sub> | 720.2418 | 721.2496 | R = OH. R <sub>1</sub> = Bz. R <sub>2</sub> = H. R <sub>3</sub> = CH <sub>3</sub> . R <sub>4</sub> = OAc                             | <chem>OC12C3([H])C(OC(C4=CC=CC=C4)=O)C(C2)(C)C(C(O)C(OC)=O)C1(C)C56C(C(C7(C)C(OC(C)=O)C6)=CC(OC7C8=COC=C8)=O)(O9)C3OC9(C)O5</chem>       |

|     |                                                 |          |          |                                                                                                                          |                                                                                                                      |
|-----|-------------------------------------------------|----------|----------|--------------------------------------------------------------------------------------------------------------------------|----------------------------------------------------------------------------------------------------------------------|
| 245 | C <sub>34</sub> H <sub>40</sub> O <sub>13</sub> | 656.2469 | 657.2547 | R = OH. R <sub>1</sub> = Tg. R <sub>2</sub> = H. R <sub>3</sub> = CH <sub>3</sub> . R <sub>4</sub> = OH                  | OC12C3([H])C(OC(/C(C)=C/C)=O)C(C2)(C)C(C(O)C(OC)=O)C1(C)C45C(C(C6(C)C(O)C5)=CC(OC6C7=COC=C7)=O)(O8)C3OC8(C)O4        |
| 246 | C <sub>36</sub> H <sub>38</sub> O <sub>13</sub> | 678.2312 | 679.2391 | R = OH. R <sub>1</sub> = Bz. R <sub>2</sub> = H. R <sub>3</sub> = CH <sub>3</sub> . R <sub>4</sub> = OH                  | OC12C3([H])C(OC(C4=CC=CC=C4)=O)C(C2)(C)C(C(O)C(OC)=O)C1(C)C56C(C(C7(C)C(O)C6)=CC(OC7C8=COC=C8)=O)(O9)C3OC9(C)O5      |
| 247 | C <sub>35</sub> H <sub>42</sub> O <sub>12</sub> | 654.2676 | 655.2755 | R = OH. R <sub>1</sub> = Tg. R <sub>2</sub> = H. R <sub>3</sub> = CH <sub>2</sub> CH <sub>3</sub> . R <sub>4</sub> = H   | OC12C3([H])C(OC(/C(C)=C/C)=O)C(C2)(C)C(C(O)C(OC)=O)C1(C)C45C(C(C6(C)C([H])C5)=CC(OC6C7=COC=C7)=O)(O8)C3OC8(CC)O4     |
| 248 | C <sub>37</sub> H <sub>40</sub> O <sub>12</sub> | 676.2520 | 677.2598 | R = OH. R <sub>1</sub> = Bz. R <sub>2</sub> = H. R <sub>3</sub> = CH <sub>2</sub> CH <sub>3</sub> . R <sub>4</sub> = H   | OC12C3([H])C(OC(C4=CC=CC=C4)=O)C(C2)(C)C(C(O)C(OC)=O)C1(C)C56C(C(C7(C)C([H])C6)=CC(OC7C8=COC=C8)=O)(O9)C3OC9(CC)O5   |
| 249 | C <sub>37</sub> H <sub>44</sub> O <sub>14</sub> | 712.2731 | 713.2809 | R = OH. R <sub>1</sub> = Tg. R <sub>2</sub> = H. R <sub>3</sub> = CH <sub>2</sub> CH <sub>3</sub> . R <sub>4</sub> = OAc | OC12C3([H])C(OC(/C(C)=C/C)=O)C(C2)(C)C(C(O)C(OC)=O)C1(C)C45C(C(C6(C)C(OC(C)=O)C5)=CC(OC6C7=COC=C7)=O)(O8)C3OC8(CC)O4 |
| 250 | C <sub>39</sub> H <sub>42</sub> O <sub>14</sub> | 734.2575 | 735.2653 | R = OH. R <sub>1</sub> = Bz. R <sub>2</sub> = H. R <sub>3</sub> = CH <sub>2</sub> CH <sub>3</sub> . R <sub>4</sub> = OAc | OC12C3([H])C(OC(C4=CC=CC=C4)=O)C(C2)(C)C(C(O)C(OC)=O)C1(C)C56C(C(C7(                                                 |

|     |                                                 |          |          |                                                                                                                            |                                                                                                                                      |
|-----|-------------------------------------------------|----------|----------|----------------------------------------------------------------------------------------------------------------------------|--------------------------------------------------------------------------------------------------------------------------------------|
|     |                                                 |          |          |                                                                                                                            | <chem>C)C(OC(C)=O)C6)=CC(OC7C8=COC=C8)=O)(O9)C3OC9(CC)O5</chem>                                                                      |
| 251 | C <sub>35</sub> H <sub>42</sub> O <sub>13</sub> | 670.2625 | 671.2704 | R = OH. R <sub>1</sub> = Tg. R <sub>2</sub> = H. R <sub>3</sub> = CH <sub>2</sub> CH <sub>3</sub> . R <sub>4</sub> = OH    | <chem>OC12C3([H])C(OC(/C(C)=C/C)=O)C(C2)(C)C(C(O)C(OC)=O)C1(C)C45C(C(C6(C)C(O)C5)=CC(OC6C7=COC=C7)=O)(O8)C3OC8(CC)O4</chem>          |
| 252 | C <sub>37</sub> H <sub>40</sub> O <sub>13</sub> | 692.2469 | 693.2547 | R = OH. R <sub>1</sub> = Bz. R <sub>2</sub> = H. R <sub>3</sub> = CH <sub>2</sub> CH <sub>3</sub> . R <sub>4</sub> = OH    | <chem>OC12C3([H])C(OC(C4=CC=CC=C4)=O)C(C2)(C)C(C(O)C(OC)=O)C1(C)C56C(C(C7(C)C(O)C6)=CC(OC7C8=COC=C8)=O)(O9)C3OC9(CC)O5</chem>        |
| 253 | C <sub>36</sub> H <sub>44</sub> O <sub>12</sub> | 668.2833 | 669.2911 | R = OH. R <sub>1</sub> = Tg. R <sub>2</sub> = H. R <sub>3</sub> = CH(CH <sub>3</sub> ) <sub>2</sub> . R <sub>4</sub> = H   | <chem>OC12C3([H])C(OC(/C(C)=C/C)=O)C(C2)(C)C(C(O)C(OC)=O)C1(C)C45C(C(C6(C)C([H])C5)=CC(OC6C7=COC=C7)=O)(O8)C3OC8(C(C)C)O4</chem>     |
| 254 | C <sub>38</sub> H <sub>42</sub> O <sub>12</sub> | 690.2676 | 691.2755 | R = OH. R <sub>1</sub> = Bz. R <sub>2</sub> = H. R <sub>3</sub> = CH(CH <sub>3</sub> ) <sub>2</sub> . R <sub>4</sub> = H   | <chem>OC12C3([H])C(OC(C4=CC=CC=C4)=O)C(C2)(C)C(C(O)C(OC)=O)C1(C)C56C(C(C7(C)C([H])C6)=CC(OC7C8=COC=C8)=O)(O9)C3OC9(C(C)C)O5</chem>   |
| 255 | C <sub>38</sub> H <sub>46</sub> O <sub>14</sub> | 726.2888 | 727.2966 | R = OH. R <sub>1</sub> = Tg. R <sub>2</sub> = H. R <sub>3</sub> = CH(CH <sub>3</sub> ) <sub>2</sub> . R <sub>4</sub> = OAc | <chem>OC12C3([H])C(OC(/C(C)=C/C)=O)C(C2)(C)C(C(O)C(OC)=O)C1(C)C45C(C(C6(C)C(OC(C)=O)C5)=CC(OC6C7=COC=C7)=O)(O8)C3OC8(C(C)C)O4</chem> |

|     |                                                 |          |          |                                                                                                                                            |                                                                                                                           |
|-----|-------------------------------------------------|----------|----------|--------------------------------------------------------------------------------------------------------------------------------------------|---------------------------------------------------------------------------------------------------------------------------|
| 256 | C <sub>40</sub> H <sub>44</sub> O <sub>14</sub> | 748.2731 | 749.2809 | R = OH. R <sub>1</sub> = Bz. R <sub>2</sub> = H. R <sub>3</sub> = CH(CH <sub>3</sub> ) <sub>2</sub> . R <sub>4</sub> = OAc                 | OC12C3([H])C(OC(C4=CC=CC=C4)=O)C(C2)(C)C(C(O)C(OC)=O)C1(C)C56C(C(C7(C)C(OC(C)=O)C6)=CC(OC7C8=COC=C8)=O)(O9)C3OC9(C(C)C)O5 |
| 257 | C <sub>36</sub> H <sub>44</sub> O <sub>13</sub> | 684.2782 | 685.2860 | R = OH. R <sub>1</sub> = Tg. R <sub>2</sub> = H. R <sub>3</sub> = CH(CH <sub>3</sub> ) <sub>2</sub> . R <sub>4</sub> = OH                  | OC12C3([H])C(OC(/C(C)=C/C)=O)C(C2)(C)C(C(O)C(OC)=O)C1(C)C45C(C(C6(C)C(O)C5)=CC(OC6C7=COC=C7)=O)(O8)C3OC8(C(C)C)O4         |
| 258 | C <sub>38</sub> H <sub>42</sub> O <sub>13</sub> | 706.2625 | 707.2704 | R = OH. R <sub>1</sub> = Bz. R <sub>2</sub> = H. R <sub>3</sub> = CH(CH <sub>3</sub> ) <sub>2</sub> . R <sub>4</sub> = OH                  | OC12C3([H])C(OC(C4=CC=CC=C4)=O)C(C2)(C)C(C(O)C(OC)=O)C1(C)C56C(C(C7(C)C(O)C6)=CC(OC7C8=COC=C8)=O)(O9)C3OC9(C(C)C)O5       |
| 259 | C <sub>37</sub> H <sub>46</sub> O <sub>12</sub> | 682.2989 | 683.3068 | R = OH. R <sub>1</sub> = Tg. R <sub>2</sub> = H. R <sub>3</sub> = CH <sub>3</sub> CHCH <sub>2</sub> CH <sub>3</sub> . R <sub>4</sub> = H   | OC12C3([H])C(OC(/C(C)=C/C)=O)C(C2)(C)C(C(O)C(OC)=O)C1(C)C45C(C(C6(C)C([H])C5)=CC(OC6C7=COC=C7)=O)(O8)C3OC8(C(C)CC)O4      |
| 260 | C <sub>39</sub> H <sub>44</sub> O <sub>12</sub> | 704.2833 | 705.2911 | R = OH. R <sub>1</sub> = Bz. R <sub>2</sub> = H. R <sub>3</sub> = CH <sub>3</sub> CHCH <sub>2</sub> CH <sub>3</sub> . R <sub>4</sub> = H   | OC12C3([H])C(OC(C4=CC=CC=C4)=O)C(C2)(C)C(C(O)C(OC)=O)C1(C)C56C(C(C7(C)C([H])C6)=CC(OC7C8=COC=C8)=O)(O9)C3OC9(C(C)CC)O5    |
| 261 | C <sub>39</sub> H <sub>48</sub> O <sub>14</sub> | 740.3044 | 741.3122 | R = OH. R <sub>1</sub> = Tg. R <sub>2</sub> = H. R <sub>3</sub> = CH <sub>3</sub> CHCH <sub>2</sub> CH <sub>3</sub> . R <sub>4</sub> = OAc | OC12C3([H])C(OC(/C(C)=C/C)=O)C(C2)(C)C(C(O)C(OC)=O)C1(C)C45C(C(C6(C)C                                                     |

|     |                                                 |          |          |                                                                                                                                            |                                                                                                                            |
|-----|-------------------------------------------------|----------|----------|--------------------------------------------------------------------------------------------------------------------------------------------|----------------------------------------------------------------------------------------------------------------------------|
|     |                                                 |          |          |                                                                                                                                            | (OC(C)=O)C5)=CC(OC6C7=COC=C7)=O)(O8)C3OC8(C(C)CC)O4                                                                        |
| 262 | C <sub>41</sub> H <sub>46</sub> O <sub>14</sub> | 762.2888 | 763.2966 | R = OH. R <sub>1</sub> = Bz. R <sub>2</sub> = H. R <sub>3</sub> = CH <sub>3</sub> CHCH <sub>2</sub> CH <sub>3</sub> . R <sub>4</sub> = OAc | OC12C3([H])C(OC(C4=CC=CC=C4)=O)C(C2)(C)C(C(O)C(OC)=O)C1(C)C56C(C(C7(C)C(OC(C)=O)C6)=CC(OC7C8=COC=C8)=O)(O9)C3OC9(C(C)CC)O5 |
| 263 | C <sub>37</sub> H <sub>46</sub> O <sub>13</sub> | 698.2938 | 699.3017 | R = OH. R <sub>1</sub> = Tg. R <sub>2</sub> = H. R <sub>3</sub> = CH <sub>3</sub> CHCH <sub>2</sub> CH <sub>3</sub> . R <sub>4</sub> = OH  | OC12C3([H])C(OC(/C(C)=C/C)=O)C(C2)(C)C(C(O)C(OC)=O)C1(C)C45C(C(C6(C)C(O)C5)=CC(OC6C7=COC=C7)=O)(O8)C3OC8(C(C)CC)O4         |
| 264 | C <sub>39</sub> H <sub>44</sub> O <sub>13</sub> | 720.2782 | 721.2860 | R = OH. R <sub>1</sub> = Bz. R <sub>2</sub> = H. R <sub>3</sub> = CH <sub>3</sub> CHCH <sub>2</sub> CH <sub>3</sub> . R <sub>4</sub> = OH  | OC12C3([H])C(OC(C4=CC=CC=C4)=O)C(C2)(C)C(C(O)C(OC)=O)C1(C)C56C(C(C7(C)C(O)C6)=CC(OC7C8=COC=C8)=O)(O9)C3OC9(C(C)CC)O5       |
| 265 | C <sub>37</sub> H <sub>44</sub> O <sub>12</sub> | 680.2833 | 681.2911 | R = OH. R <sub>1</sub> = Tg. R <sub>2</sub> = H. R <sub>3</sub> = (E)-CH <sub>3</sub> C=CHCH <sub>3</sub> . R <sub>4</sub> = H             | OC12C3([H])C(OC(/C(C)=C/C)=O)C(C2)(C)C(C(O)C(OC)=O)C1(C)C45C(C(C6(C)C([H])C5)=CC(OC6C7=COC=C7)=O)(O8)C3OC8(/C(C)=C/C)O4    |
| 266 | C <sub>39</sub> H <sub>42</sub> O <sub>12</sub> | 702.2676 | 703.2755 | R = OH. R <sub>1</sub> = Bz. R <sub>2</sub> = H. R <sub>3</sub> = (E)-CH <sub>3</sub> C=CHCH <sub>3</sub> . R <sub>4</sub> = H             | OC12C3([H])C(OC(C4=CC=CC=C4)=O)C(C2)(C)C(C(O)C(OC)=O)C1(C)C56C(C(C7(C)C([H])C6)=CC(OC7C8=COC=C8)=O)(O9)C3OC9(/C(C)=C/C)O5  |

|     |                                                 |          |          |                                                                                                                                  |                                                                                                                               |
|-----|-------------------------------------------------|----------|----------|----------------------------------------------------------------------------------------------------------------------------------|-------------------------------------------------------------------------------------------------------------------------------|
| 267 | C <sub>39</sub> H <sub>46</sub> O <sub>14</sub> | 738.2888 | 739.2966 | R = OH. R <sub>1</sub> = Tg. R <sub>2</sub> = H. R <sub>3</sub> = (E)-CH <sub>3</sub> C=CHCH <sub>3</sub> . R <sub>4</sub> = OAc | OC12C3([H])C(OC(/C(C)=C/C)=O)C(C2)(C)C(C(O)C(OC)=O)C1(C)C45C(C(C6(C)C(OC(C)=O)C5)=CC(OC6C7=COC=C7)=O)(O8)C3OC8(/C(C)=C/C)O4   |
| 268 | C <sub>41</sub> H <sub>44</sub> O <sub>14</sub> | 760.2731 | 761.2809 | R = OH. R <sub>1</sub> = Bz. R <sub>2</sub> = H. R <sub>3</sub> = (E)-CH <sub>3</sub> C=CHCH <sub>3</sub> . R <sub>4</sub> = OAc | OC12C3([H])C(OC(C4=CC=CC=C4)=O)C(C2)(C)C(C(O)C(OC)=O)C1(C)C56C(C(C7(C)C(OC(C)=O)C6)=CC(OC7C8=COC=C8)=O)(O9)C3OC9(/C(C)=C/C)O5 |
| 269 | C <sub>37</sub> H <sub>44</sub> O <sub>13</sub> | 696.2782 | 697.2860 | R = OH. R <sub>1</sub> = Tg. R <sub>2</sub> = H. R <sub>3</sub> = (E)-CH <sub>3</sub> C=CHCH <sub>3</sub> . R <sub>4</sub> = OH  | OC12C3([H])C(OC(/C(C)=C/C)=O)C(C2)(C)C(C(O)C(OC)=O)C1(C)C45C(C(C6(C)C(O)C5)=CC(OC6C7=COC=C7)=O)(O8)C3OC8(/C(C)=C/C)O4         |
| 270 | C <sub>39</sub> H <sub>42</sub> O <sub>13</sub> | 718.2625 | 719.2704 | R = OH. R <sub>1</sub> = Bz. R <sub>2</sub> = H. R <sub>3</sub> = (E)-CH <sub>3</sub> C=CHCH <sub>3</sub> . R <sub>4</sub> = OH  | OC12C3([H])C(OC(C4=CC=CC=C4)=O)C(C2)(C)C(C(O)C(OC)=O)C1(C)C56C(C(C7(C)C(O)C6)=CC(OC7C8=COC=C8)=O)(O9)C3OC9(/C(C)=C/C)O5       |

<sup>1</sup>Substitution sites based on the structure of phragmalin-type limonoids with an 8,9,30-*ortho*-ester unit reported on literature.

**Table S3.** General fragmentation reactions observed in phragmalin-limonoid type.

| Characteristic groups | Neutral loss                                                    | ESI <sup>+</sup> fragment mass |
|-----------------------|-----------------------------------------------------------------|--------------------------------|
|                       | <br>C <sub>2</sub> H <sub>4</sub> O <sub>2</sub> (60 Da)        | <br>$F^+ = MW + 1 - C_2H_4O_2$ |
|                       | <br>C <sub>2</sub> H <sub>4</sub> O <sub>2</sub> (60 Da)        | <br>$F^+ = MW + 1 - C_2H_4O_2$ |
|                       | <br>C <sub>2</sub> H <sub>2</sub> O (42 Da)                     | <br>$F^+ = MW + 1 - C_2H_2O$   |
|                       | <br>CH <sub>4</sub> O (32 Da)                                   | <br>$F^+ = MW + 1 - CH_4O$     |
|                       | <br>CO (28 Da)                                                  | <br>$F^+ = MW + 1 - CO$        |
|                       | <br>H <sub>2</sub> O (18 Da)                                    | <br>$F^+ = MW + 1 - H_2O$      |
|                       | <br>CO <sub>2</sub> (44 Da)                                     | <br>$F^+ = MW + 1 - CO_2$      |
|                       | <br>C <sub>5</sub> H <sub>4</sub> O <sub>2</sub> (96 Da)<br>RDA | <br>$F^+ = MW + 1 - C_5H_4O_2$ |



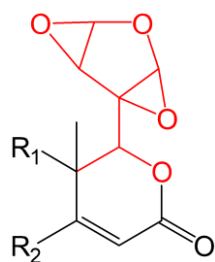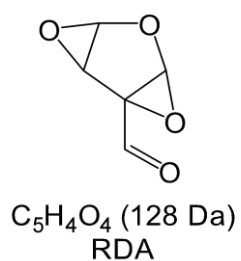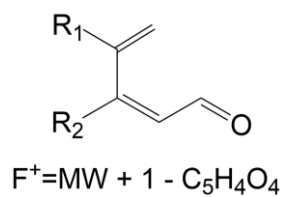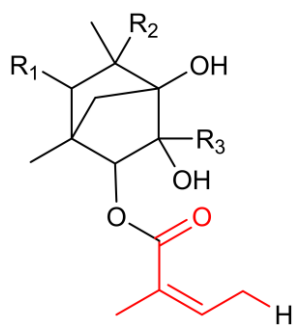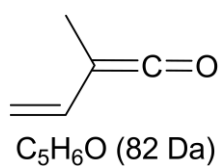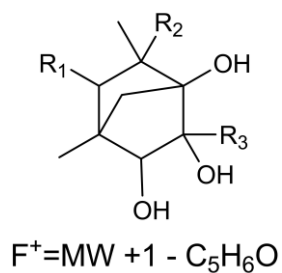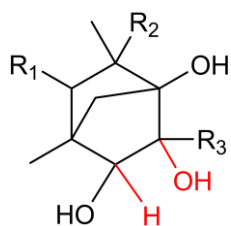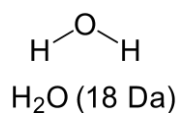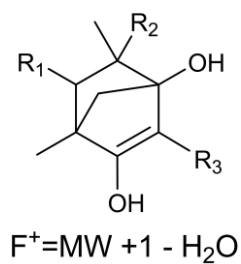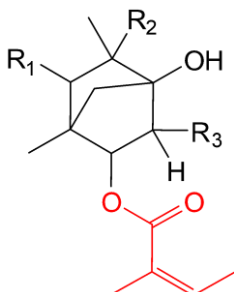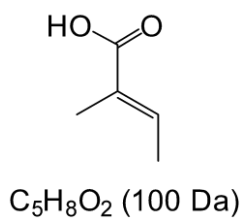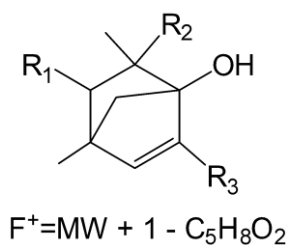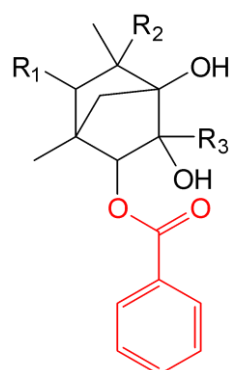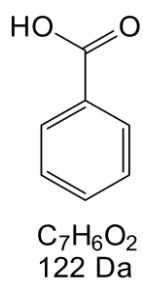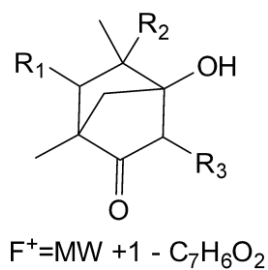

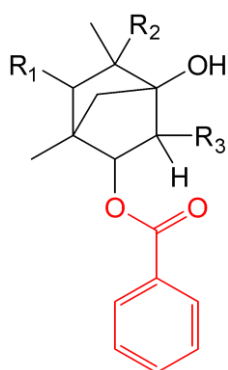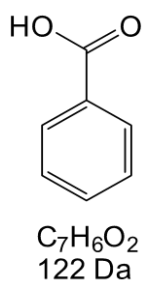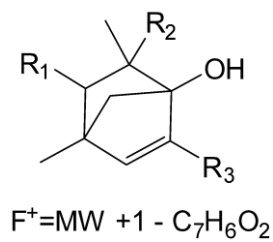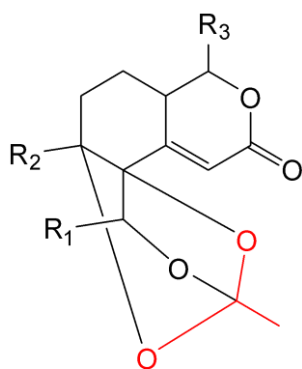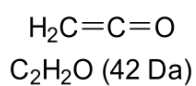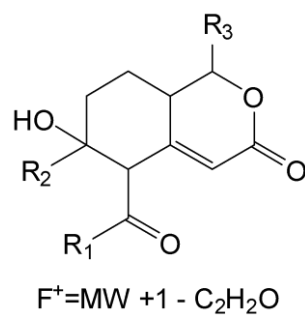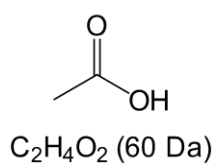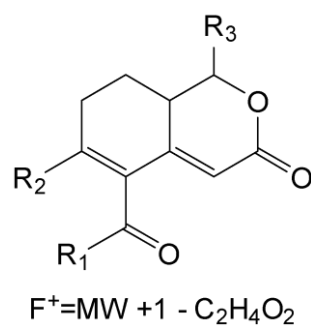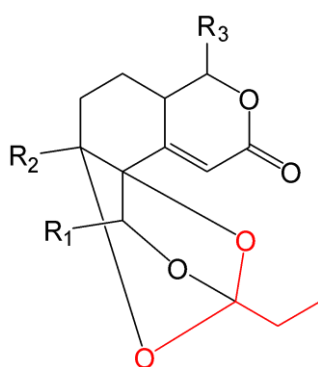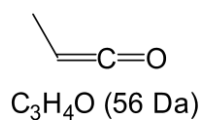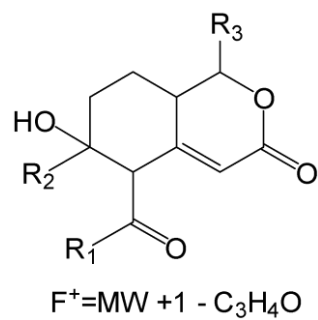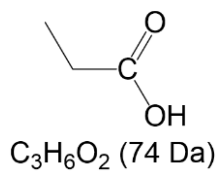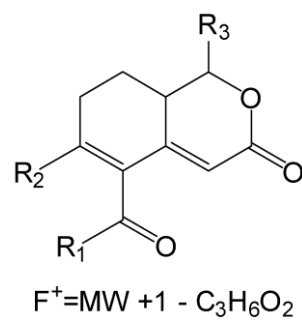

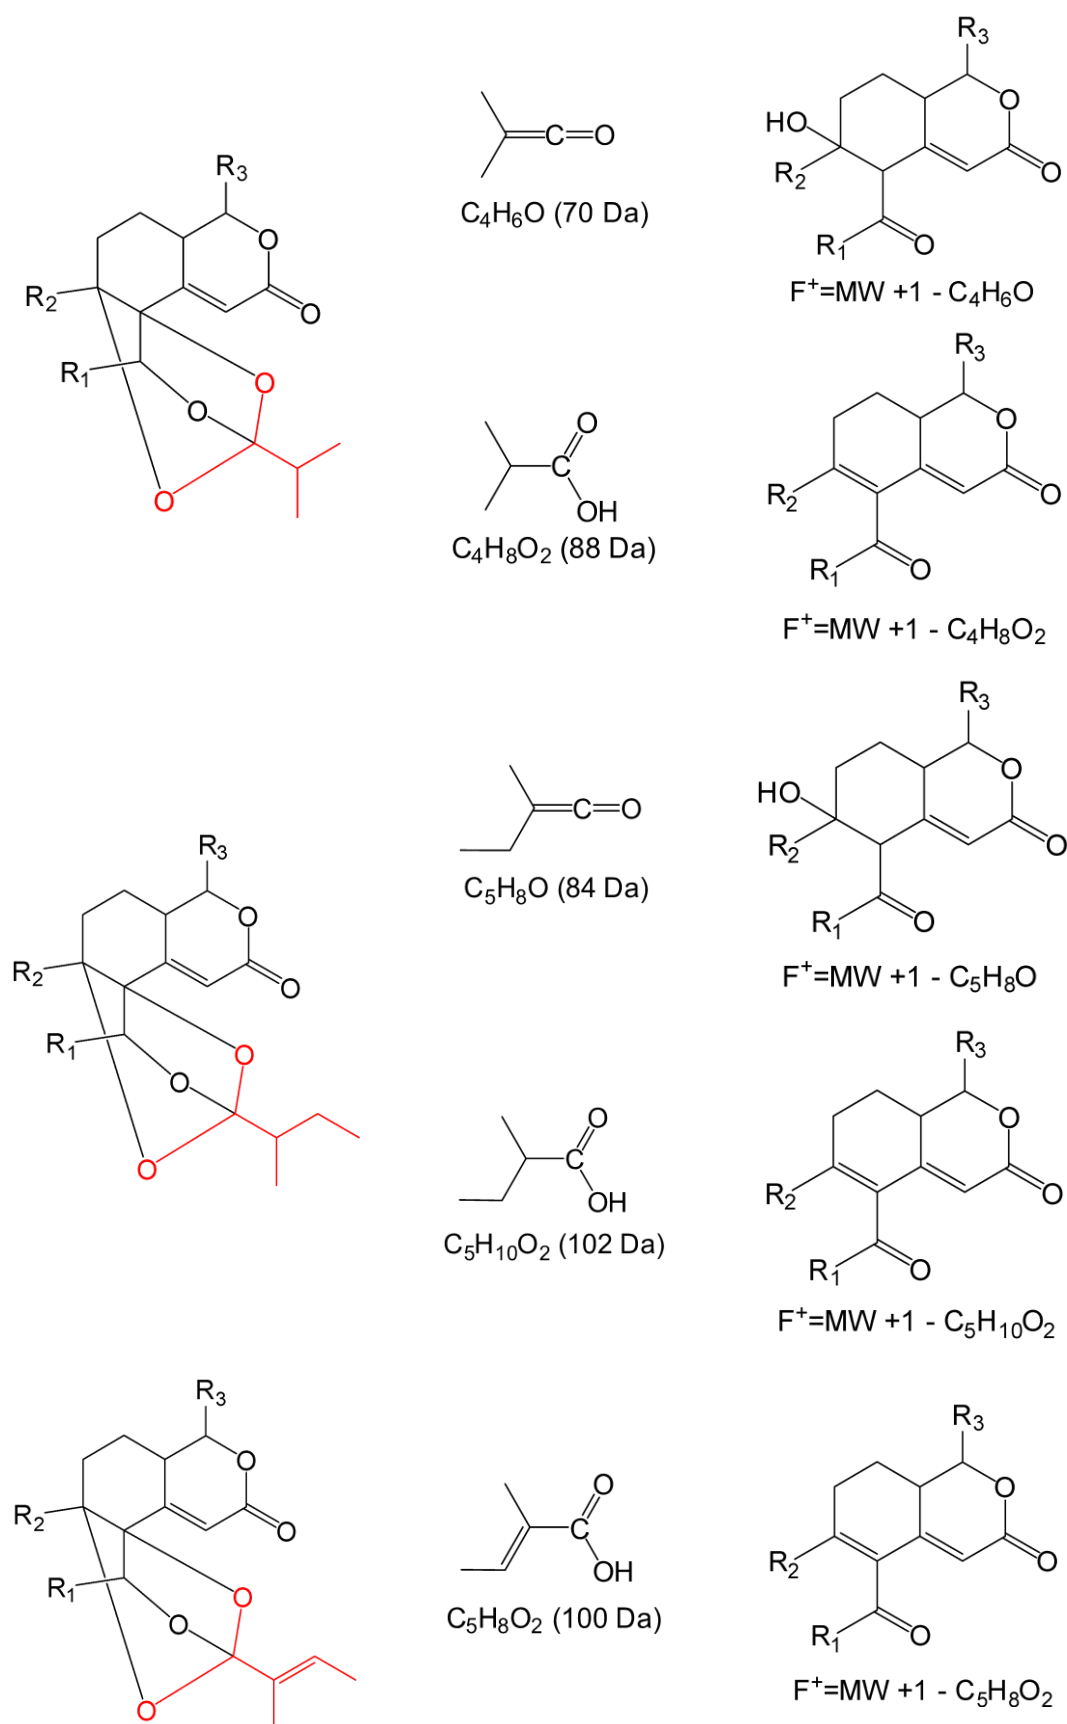

Legend: Red color corresponds to the main neutral losses that occur in the limonoids described in this work;  
 $F^+$ : Fragment ion; MW: Molecular weight;  $F^+ = MW + 1 - MF$  (Molecular formula): Equation corresponds to

the fragmentation of the molecule with an additional proton ( $MW + 1$ ), resulting in the formation of the fragment ion.

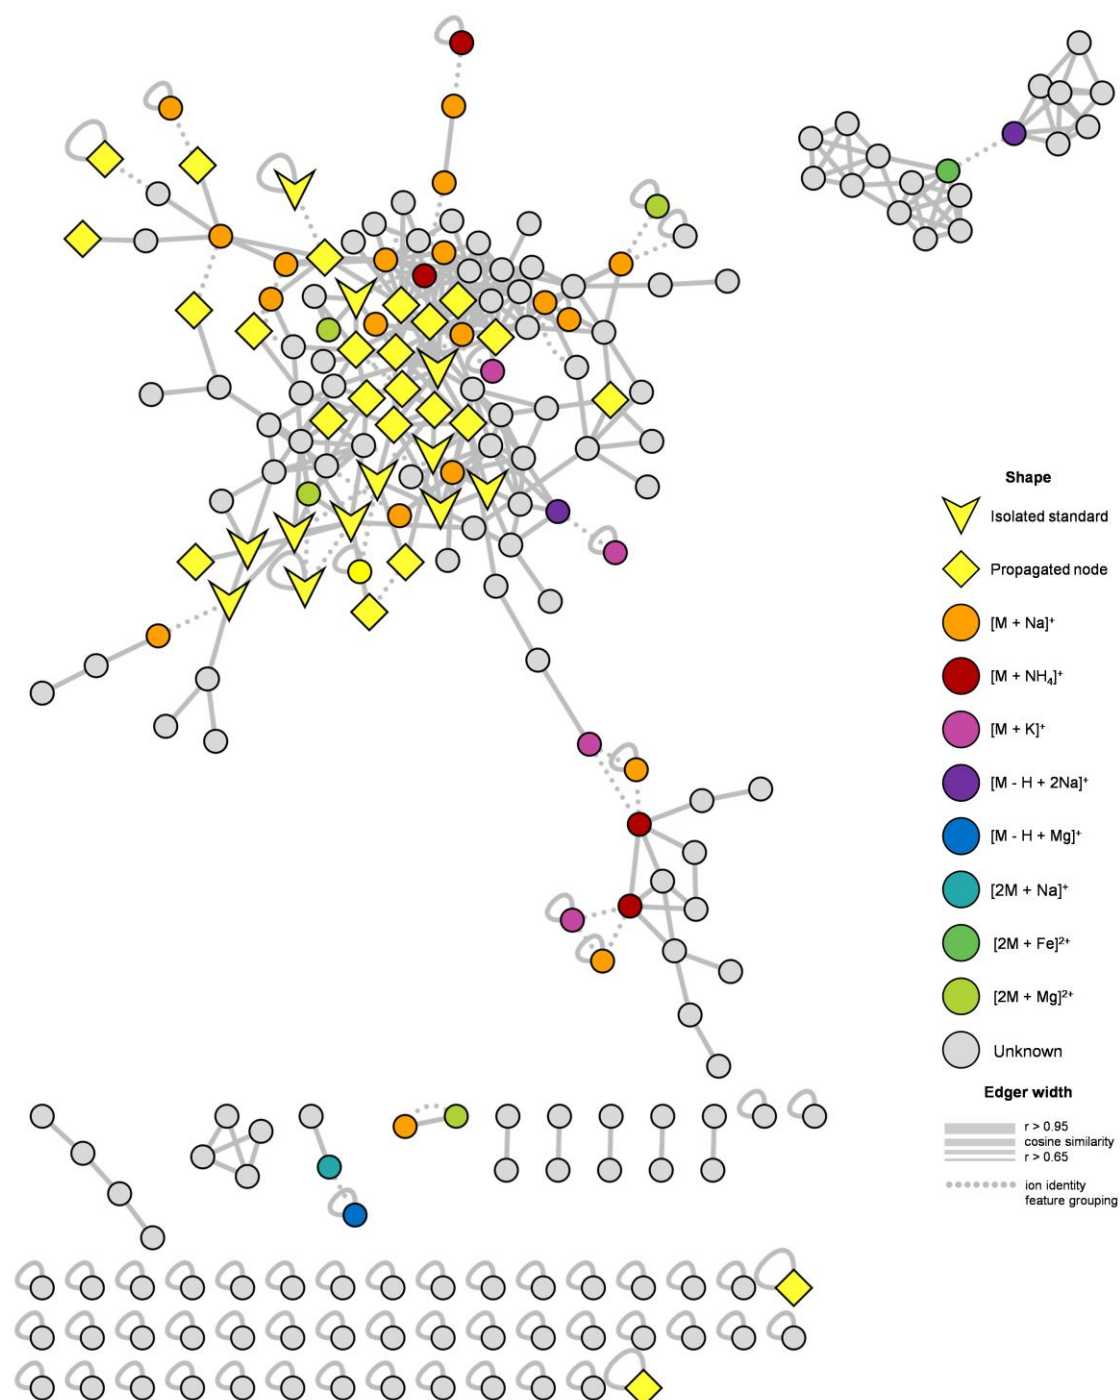

**Figure S1.** Molecular network from *Swietenia macrophylla* G. King dichloromethane extract (DCMEt) using UPLC-HRMS in positive ionization mode ESI<sup>+</sup> (<https://gnps.ucsd.edu/ProteoSAFe/status.jsp?task=8b7d836ad2694de0b932cf65db8c3fae>). The network consist of 218 molecular features and the dataset be available in MassIVE CCMS MSV000087547 (<https://massive.ucsd.edu/ProteoSAFe/dataset.jsp?task=f6307135be7c416584e8327d36c07146>).

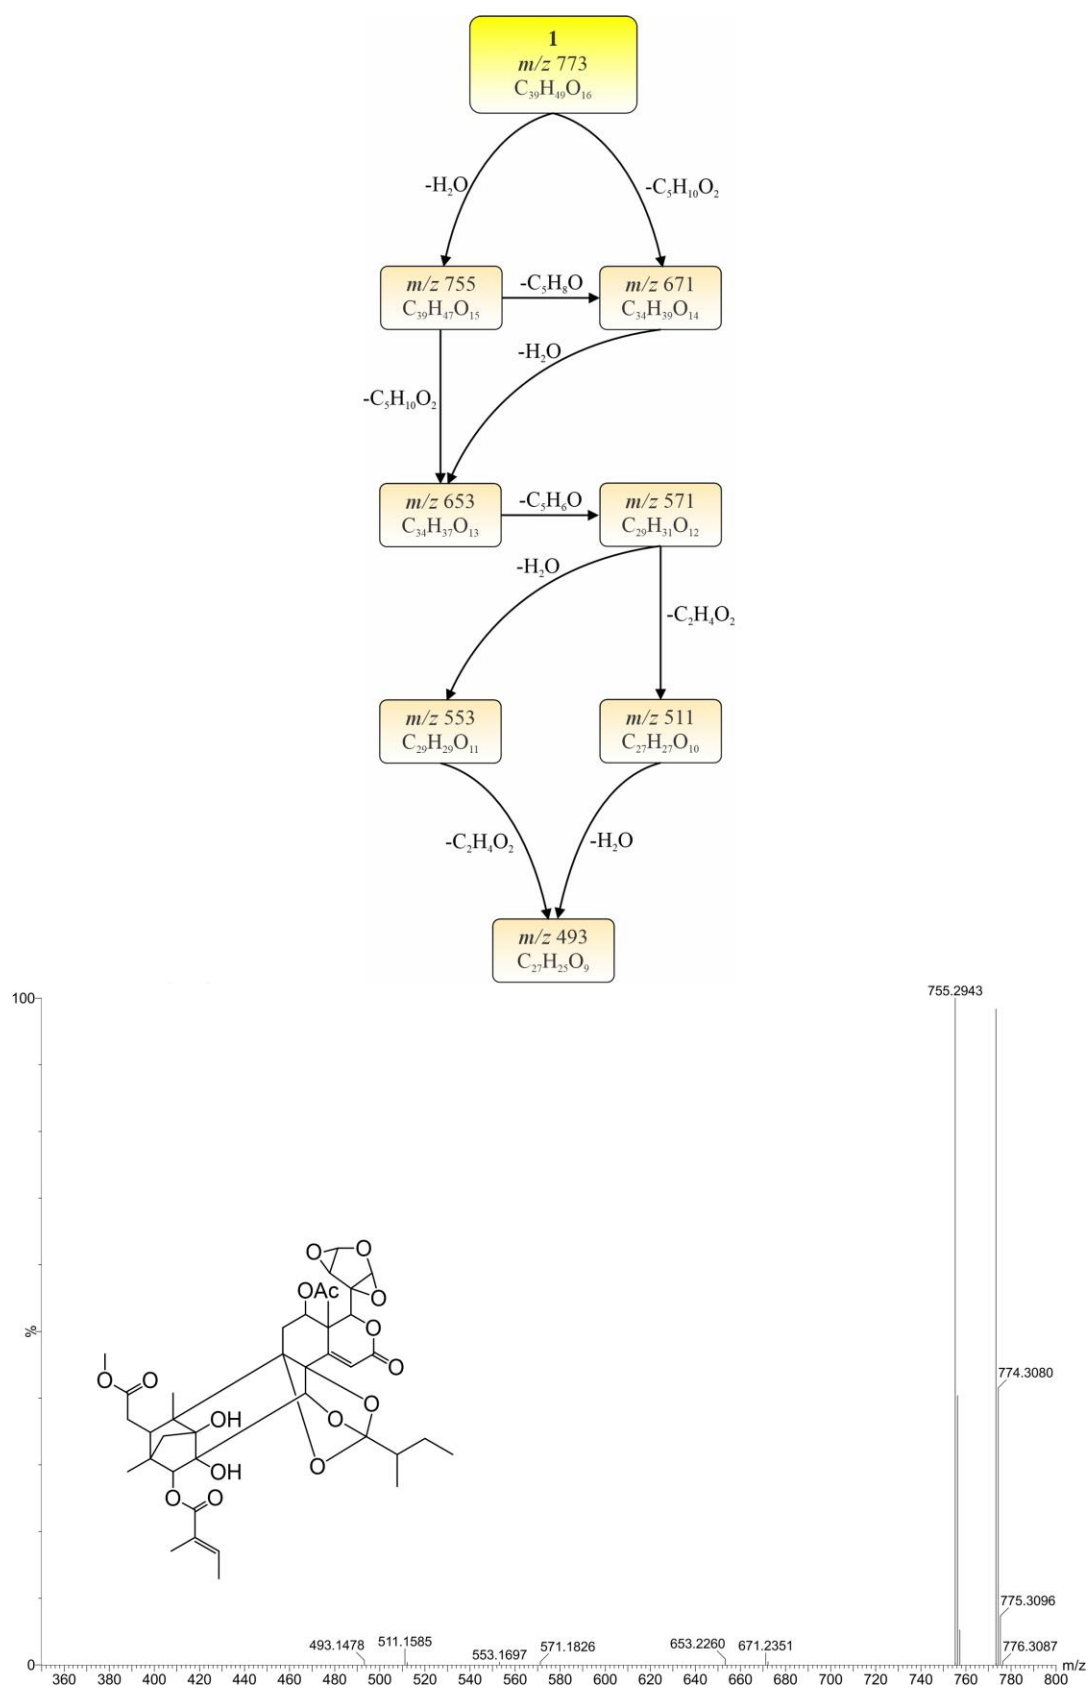

Figure S2. Fragmentation pattern of limonoid 1 computed from tandem MS data.

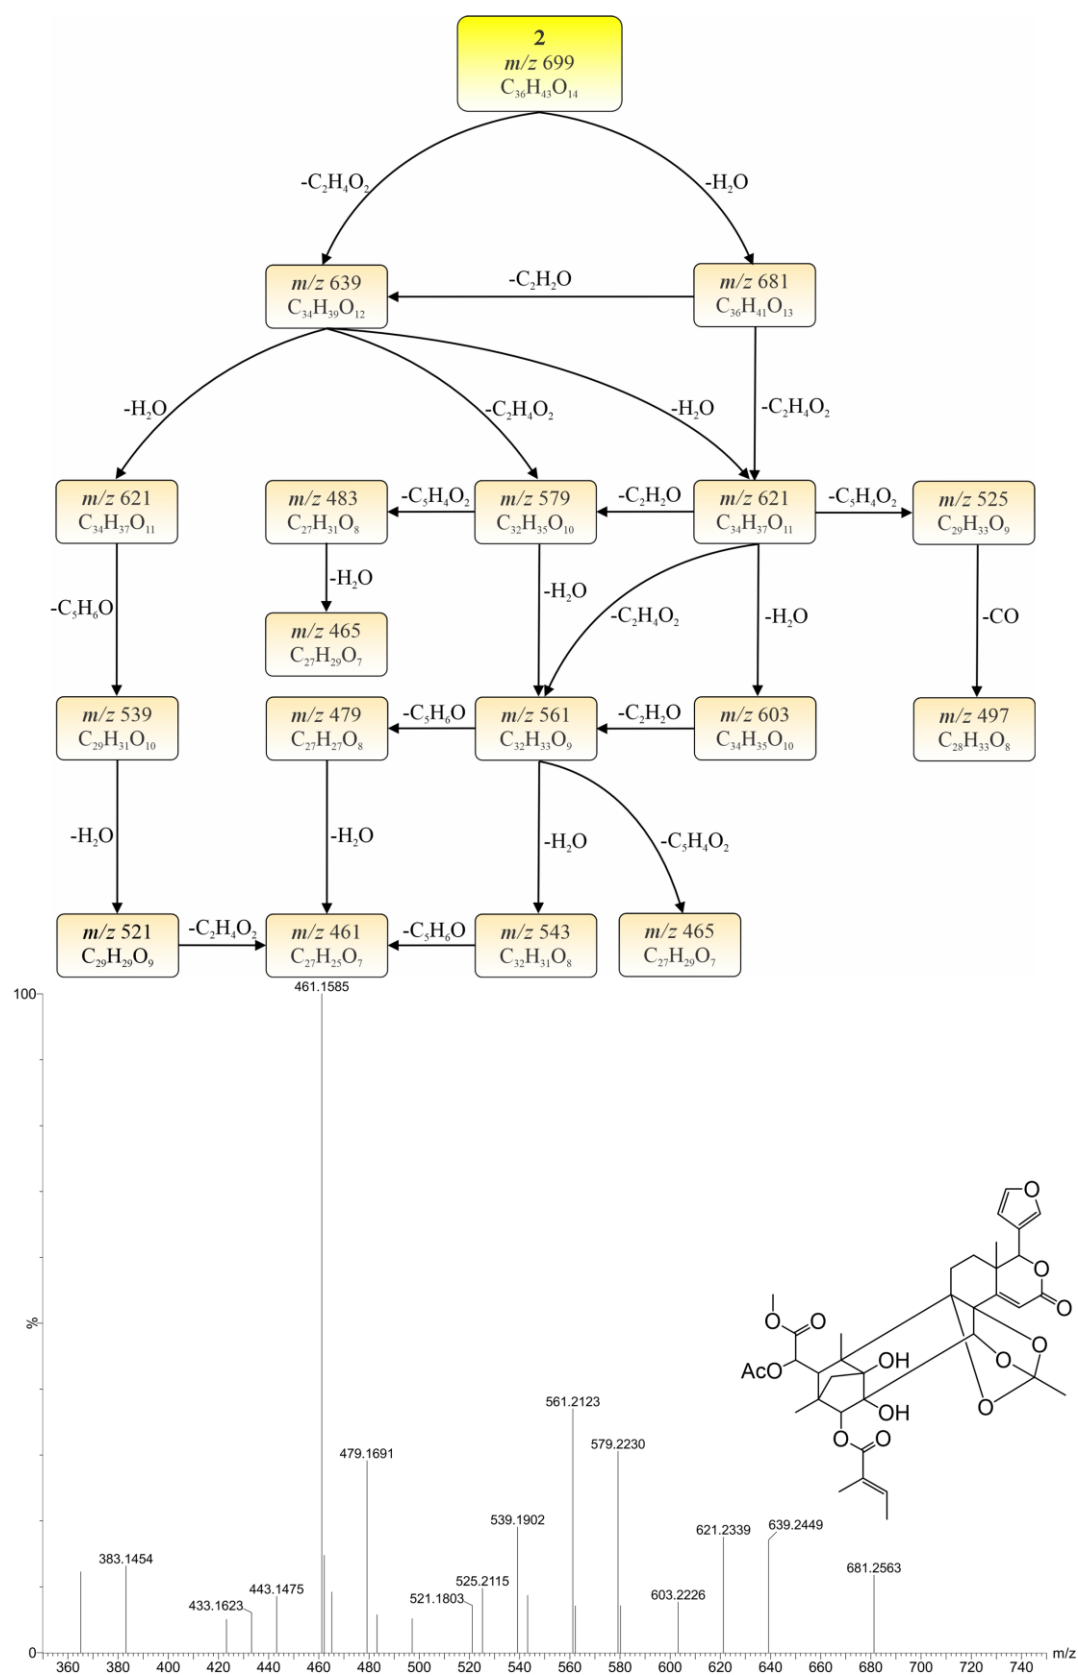

Figure S3. Fragmentation pattern of limonoid 2 computed from tandem MS data.

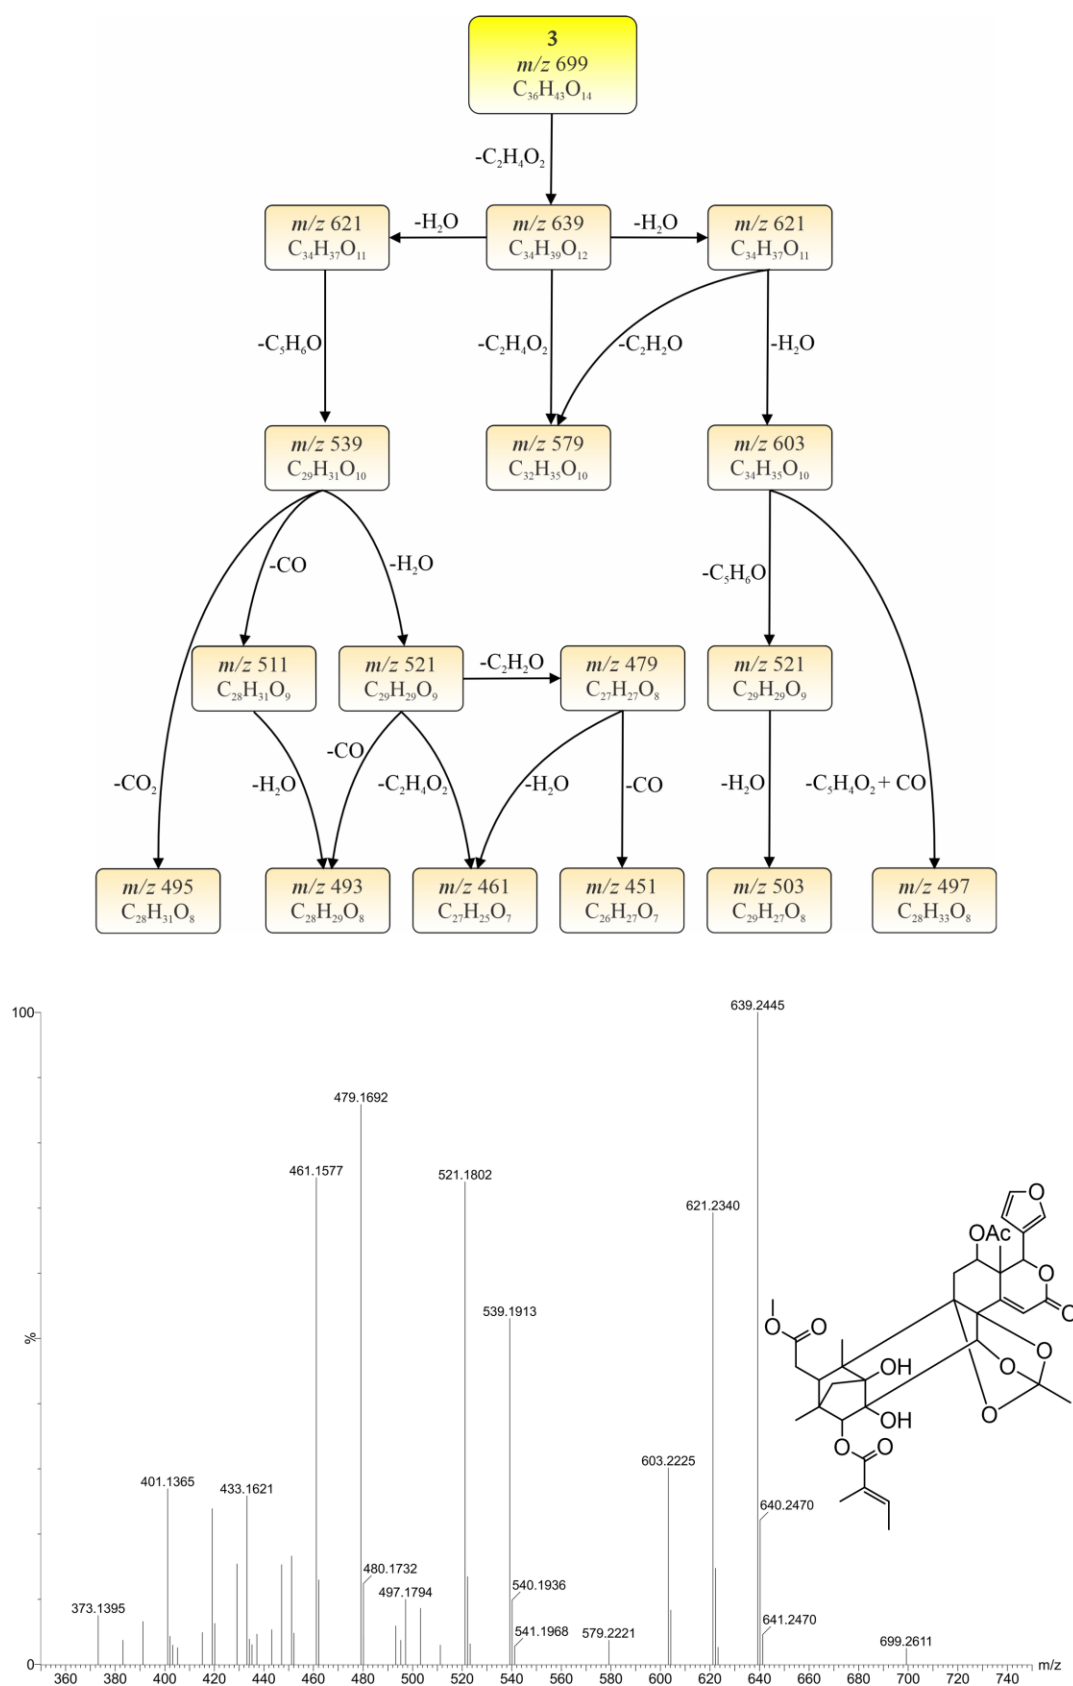

**Figure S4.** Fragmentation pattern of limonoid 3 computed from tandem MS data.

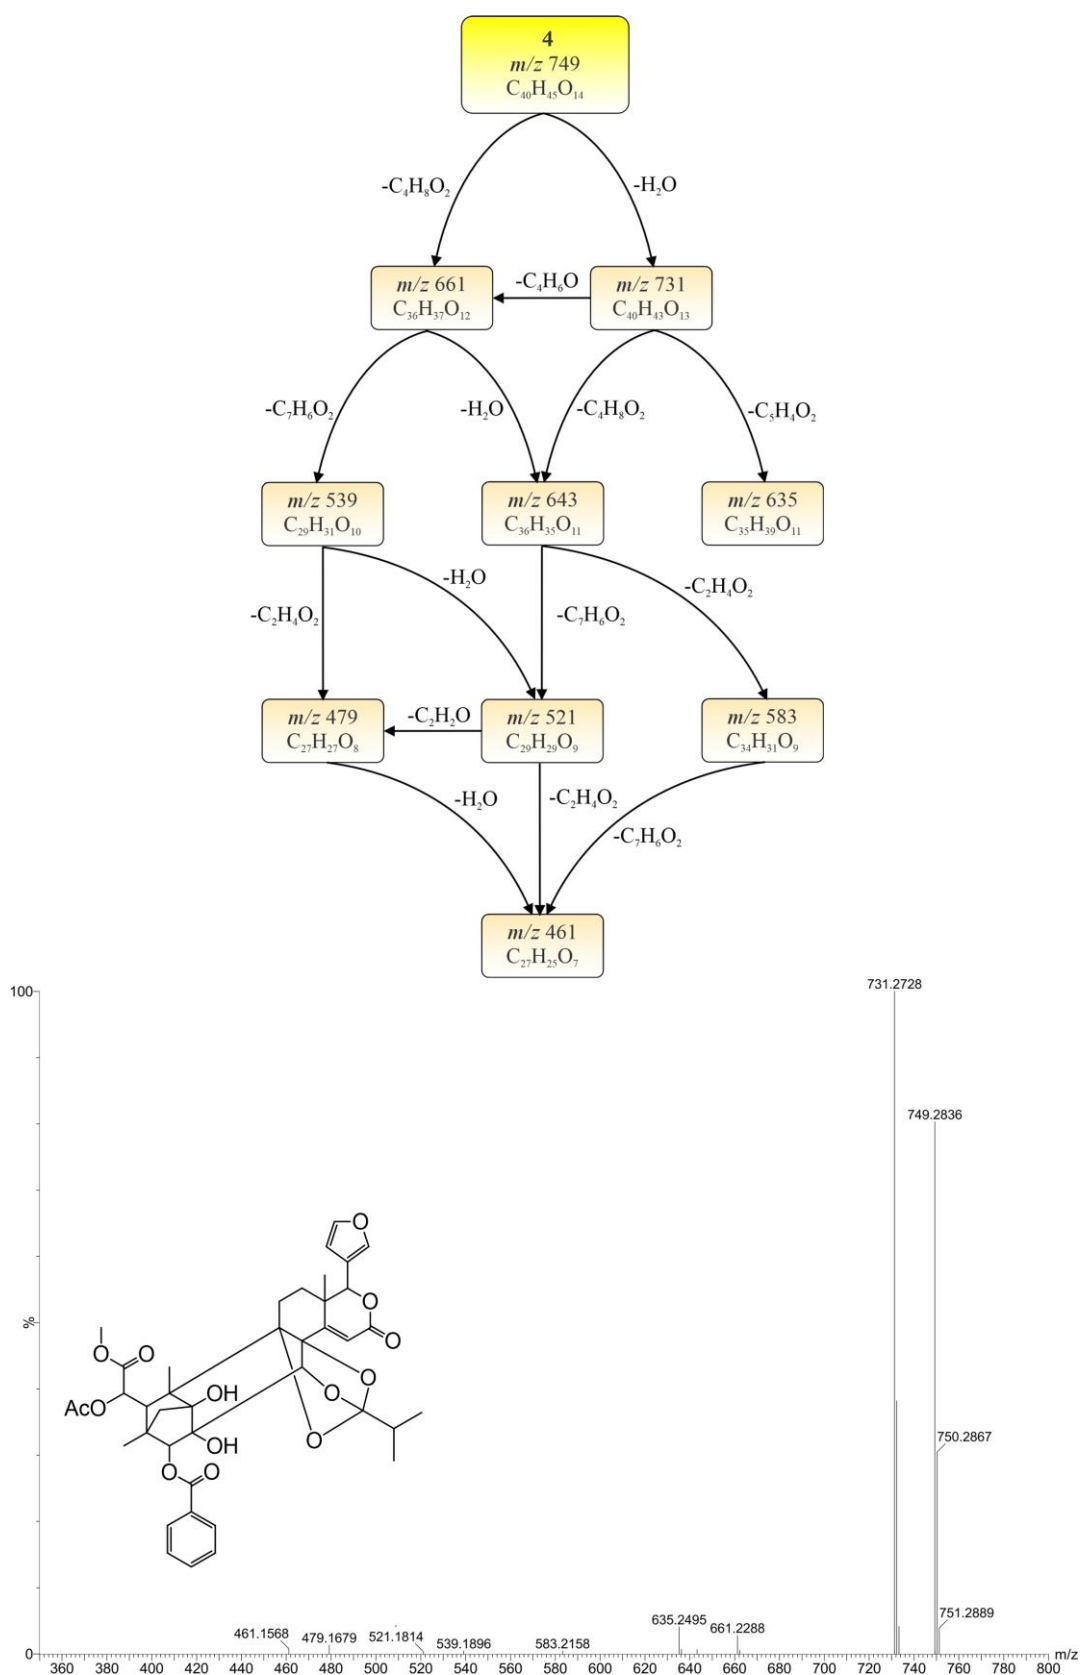

Figure S5. Fragmentation pattern of limonoid 4 computed from tandem MS data.



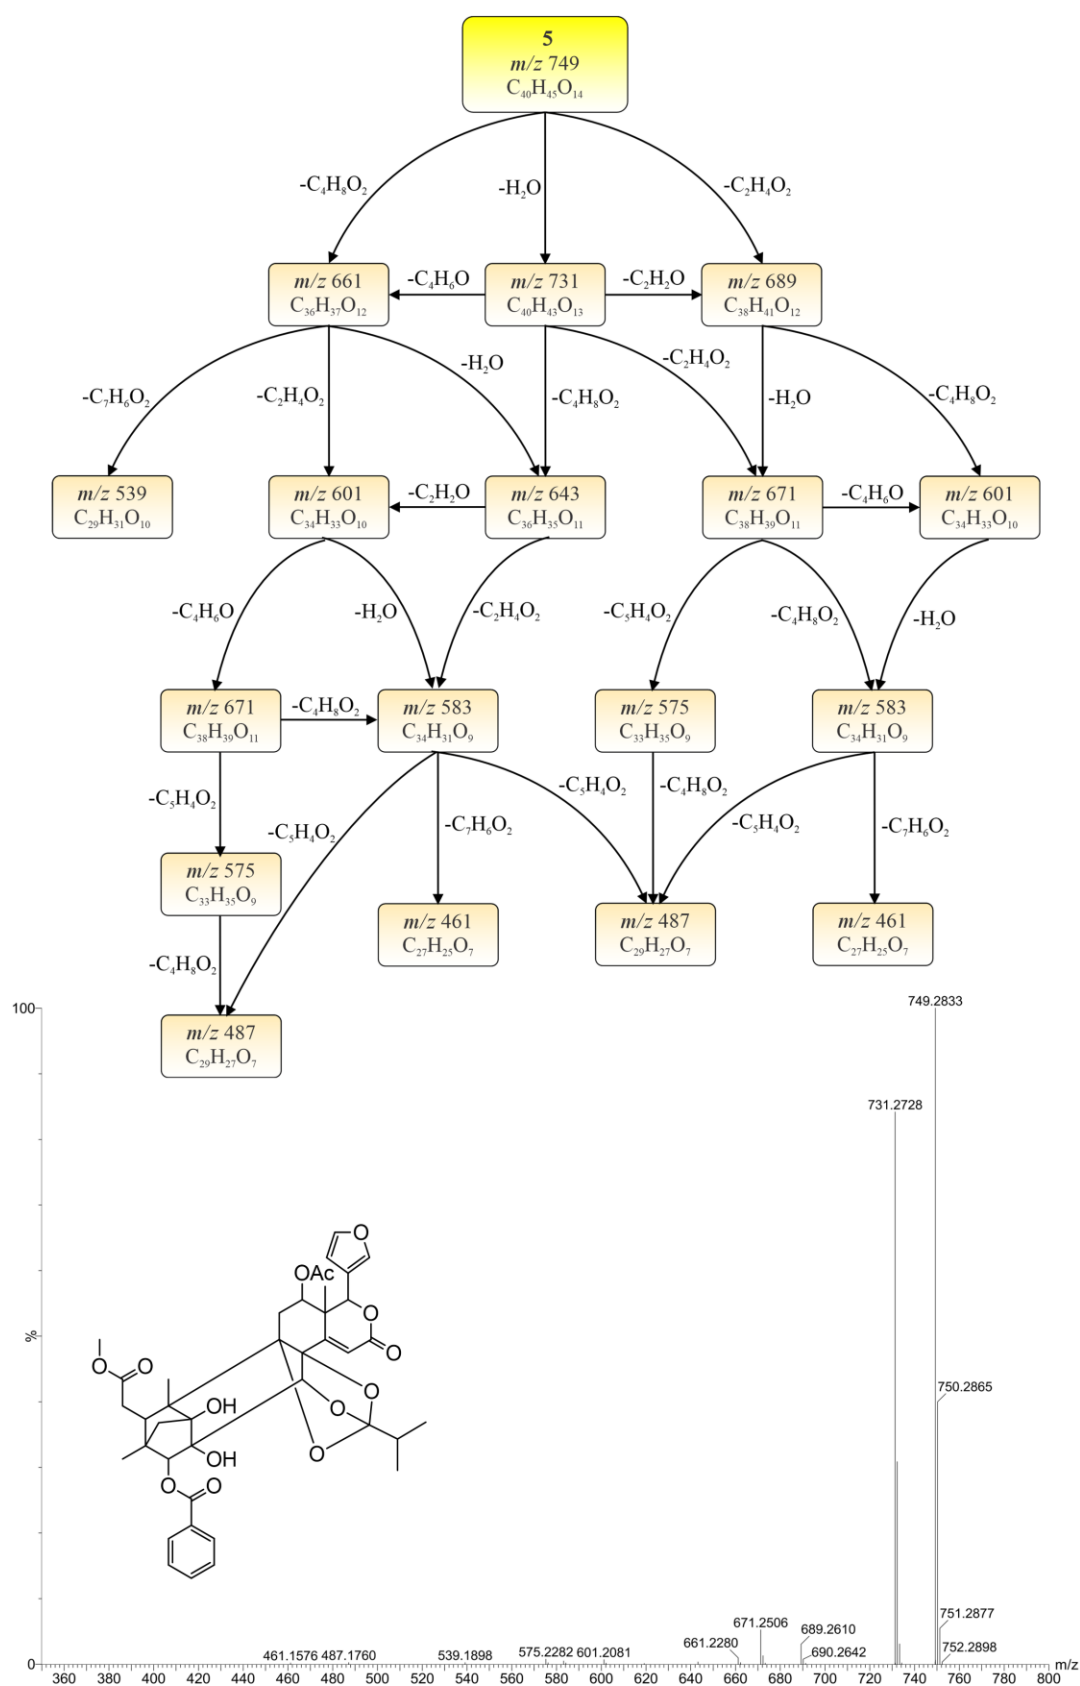

Figure S6. Fragmentation pattern of limonoid 5 computed from tandem MS data.

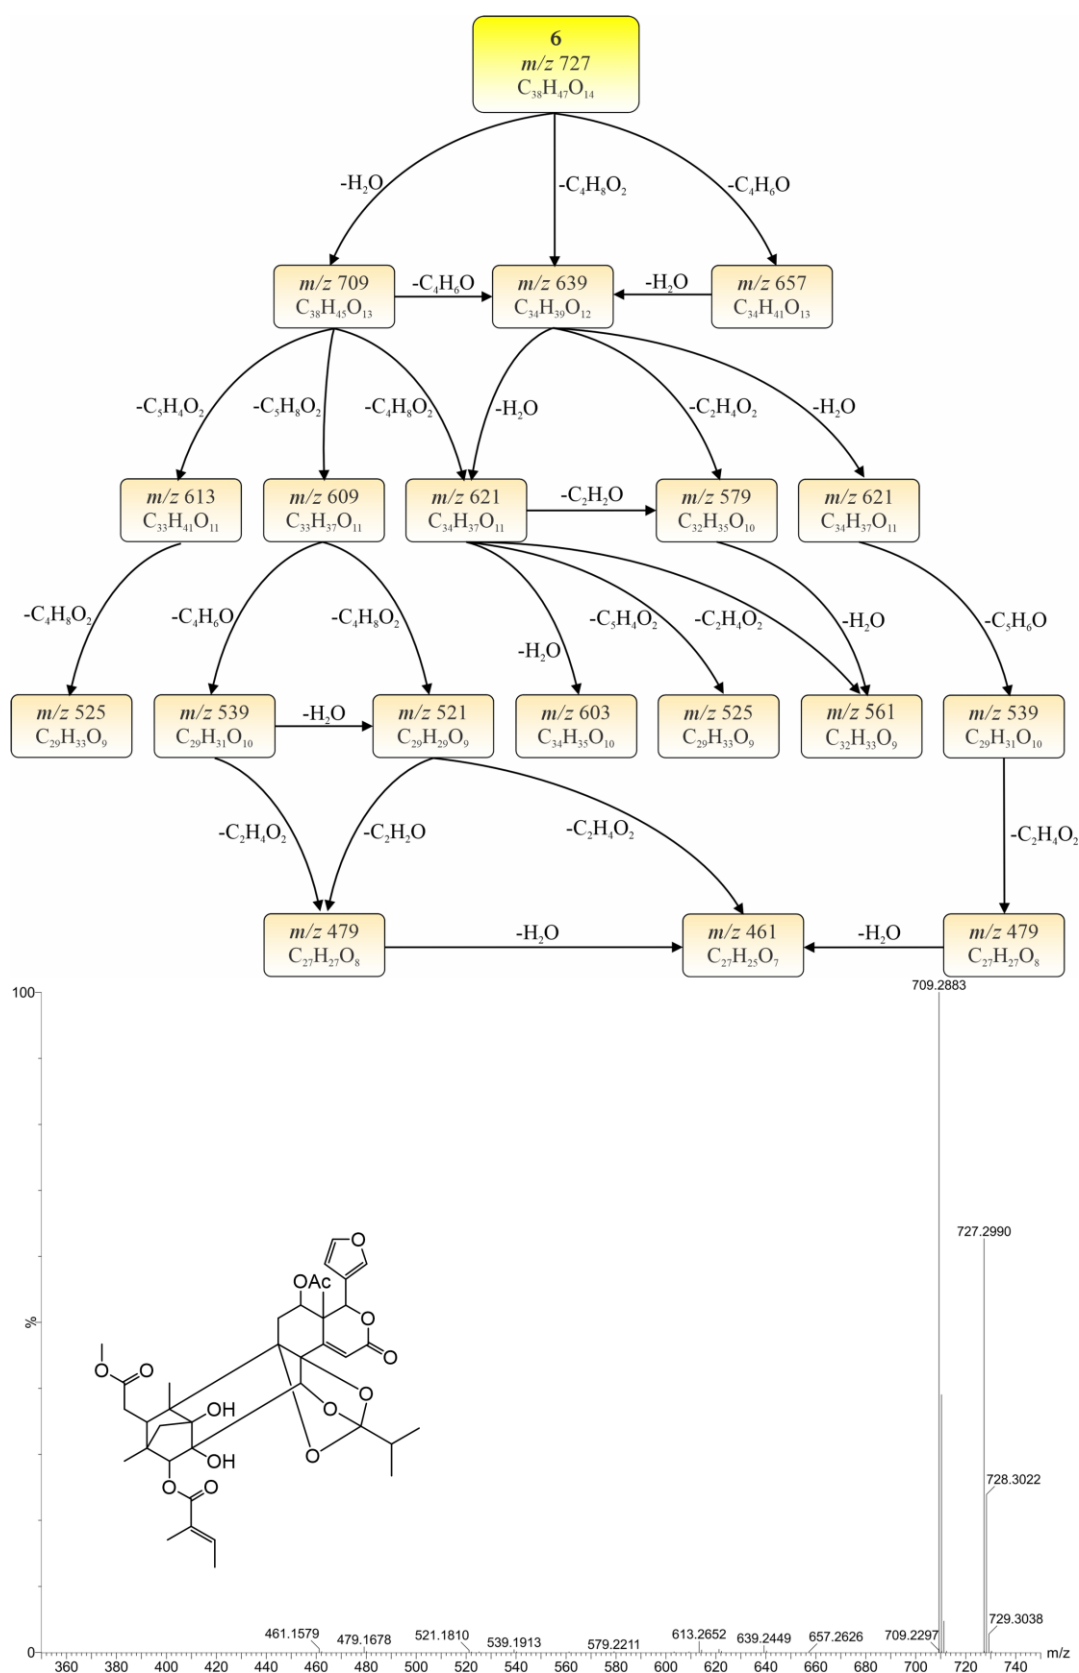

**Figure S7.** Fragmentation pattern of limonoid 6 computed from tandem MS data.

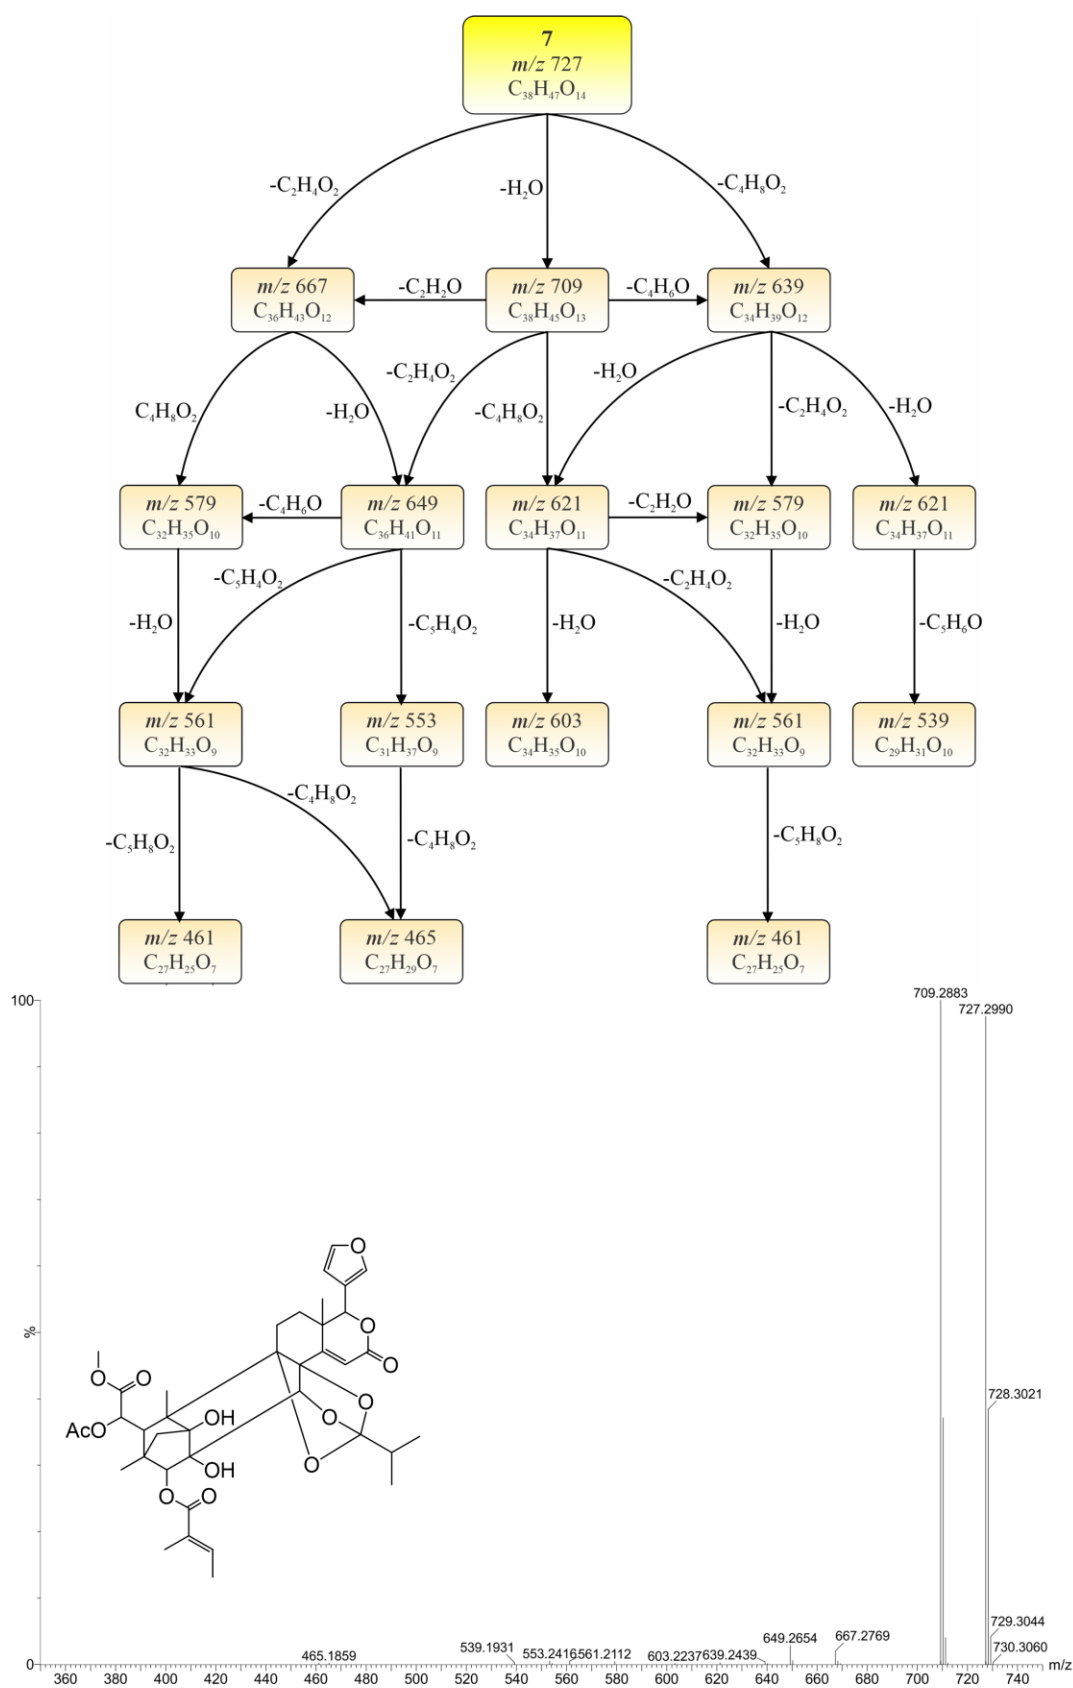

Figure S8. Fragmentation pattern of limonoid 7 computed from tandem MS data.

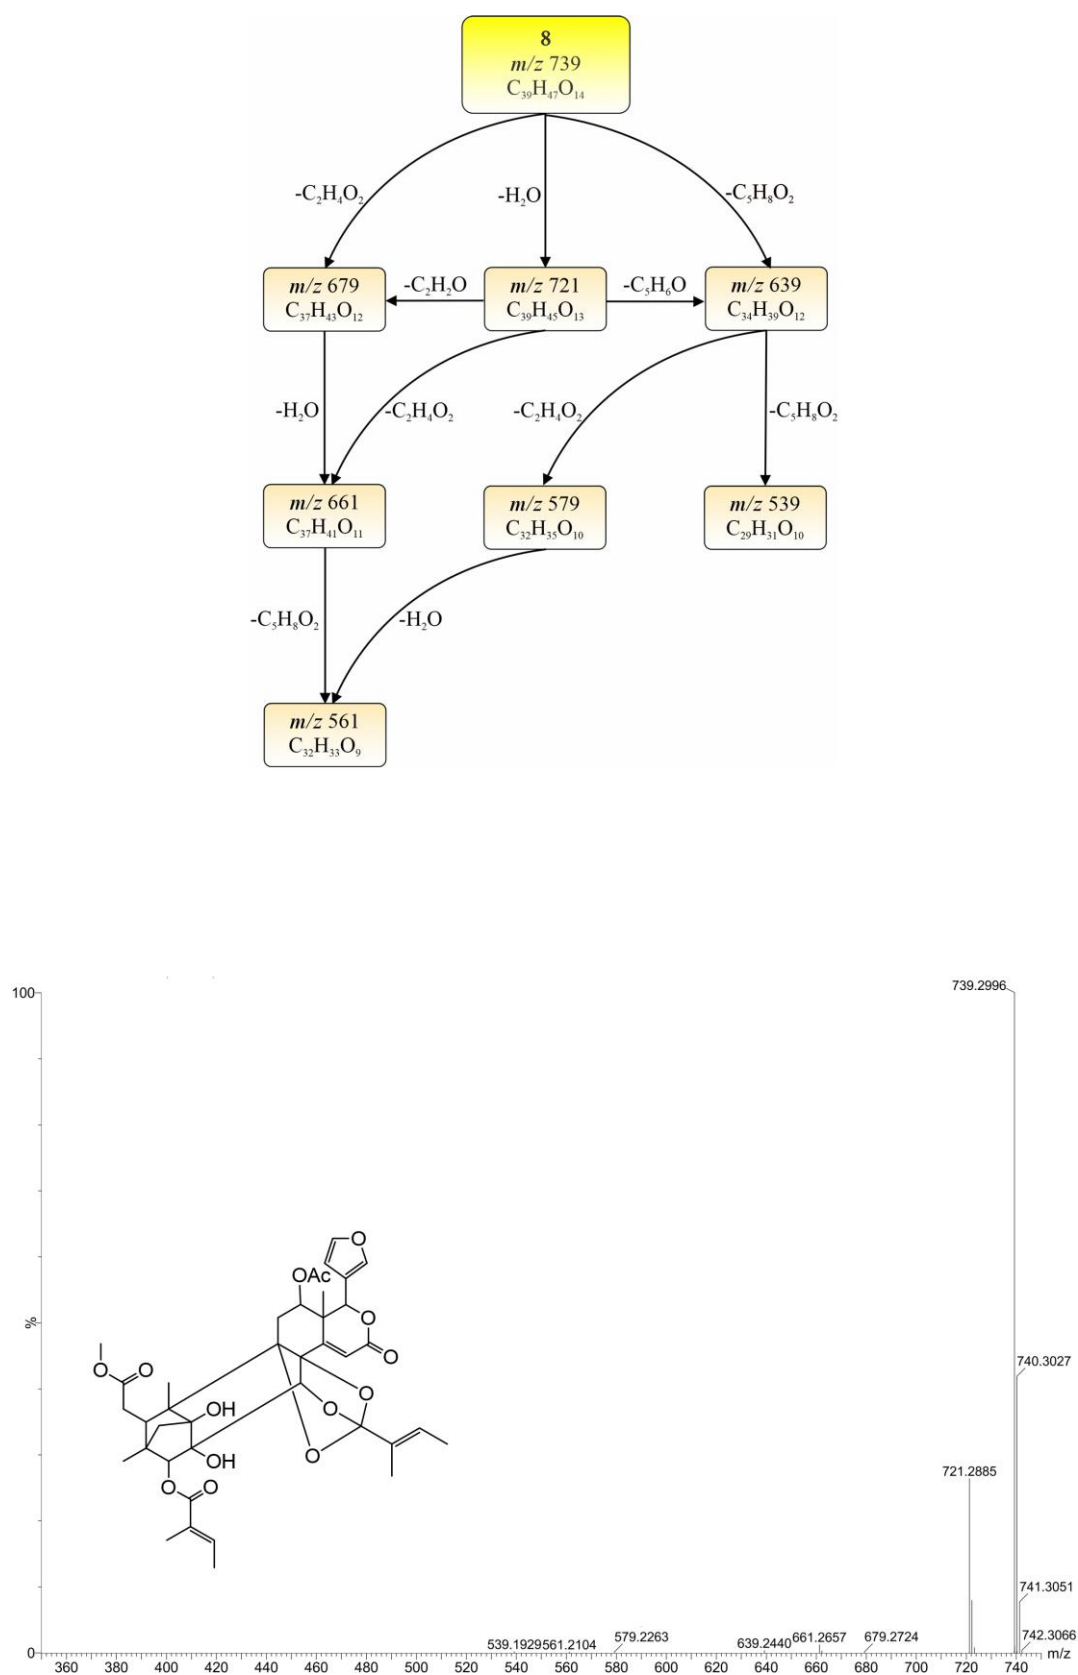

Figure S9. Fragmentation pattern of limonoid 8 computed from tandem MS data.

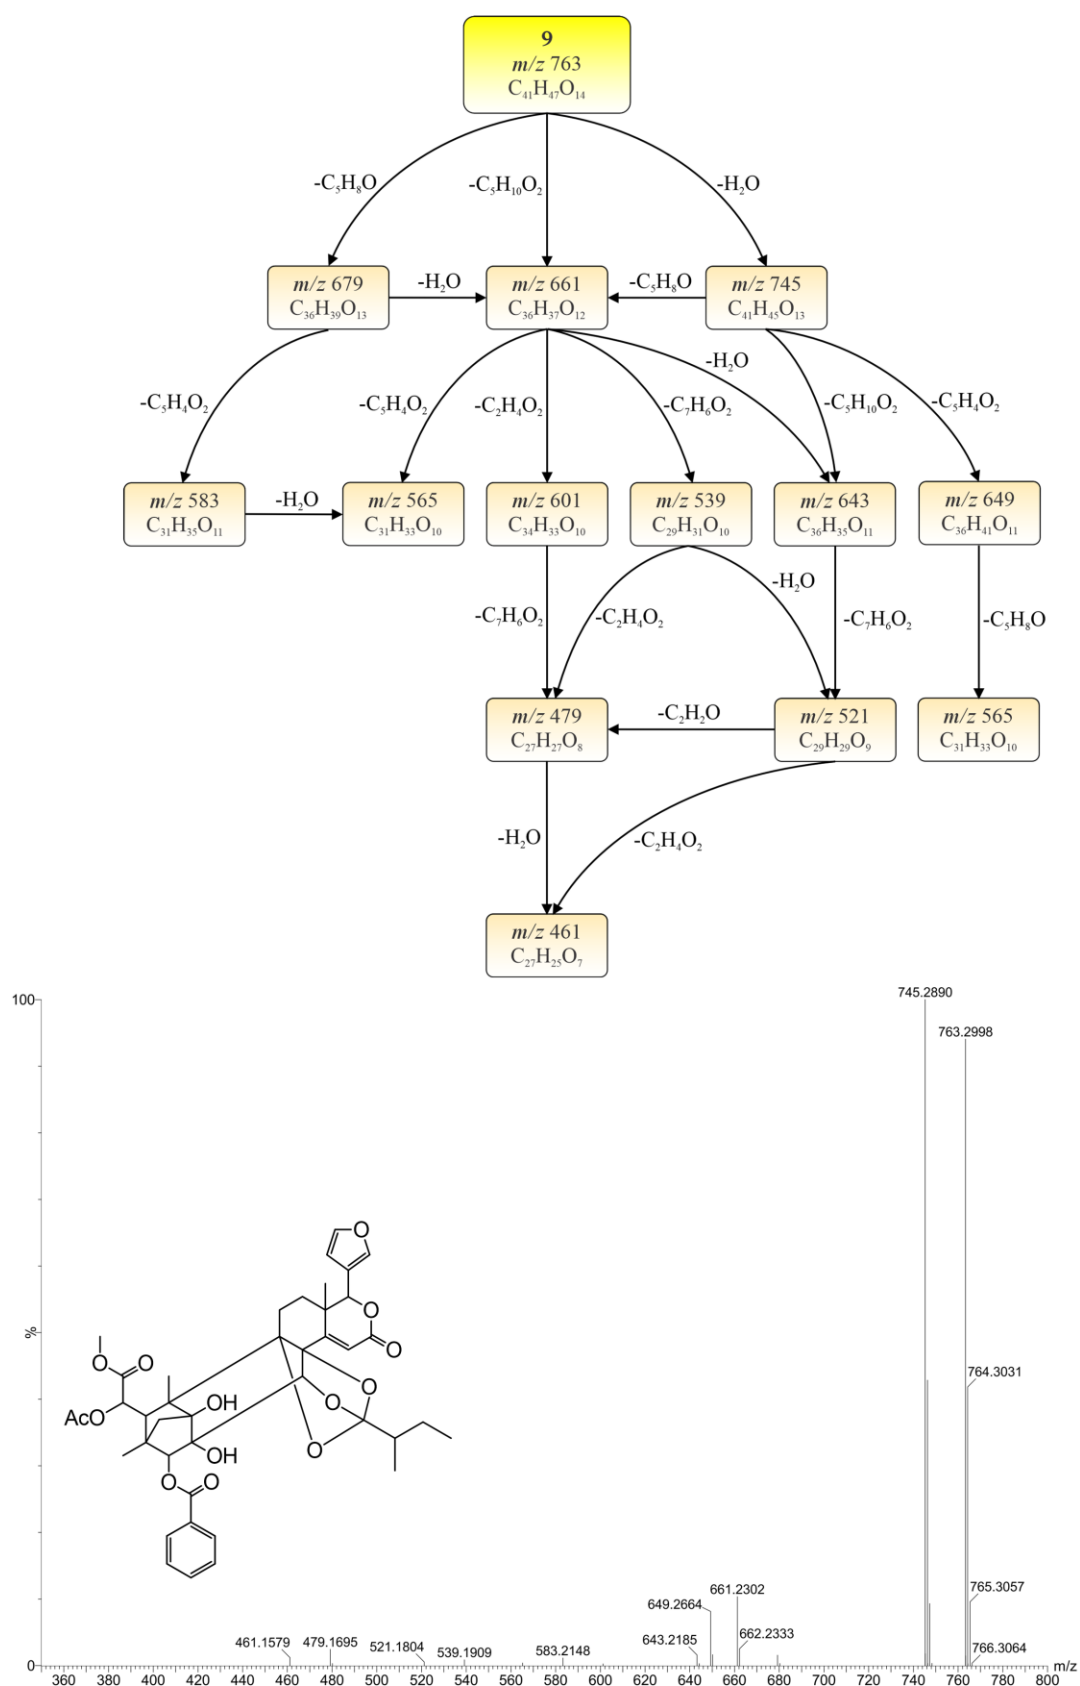

Figure S10. Fragmentation pattern of limonoid 9 computed from tandem MS data.

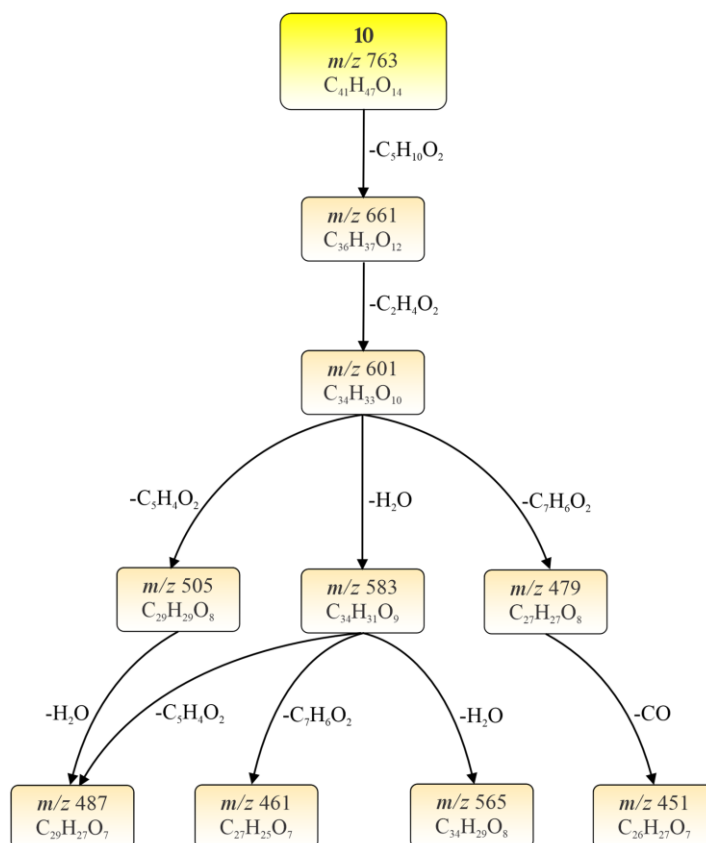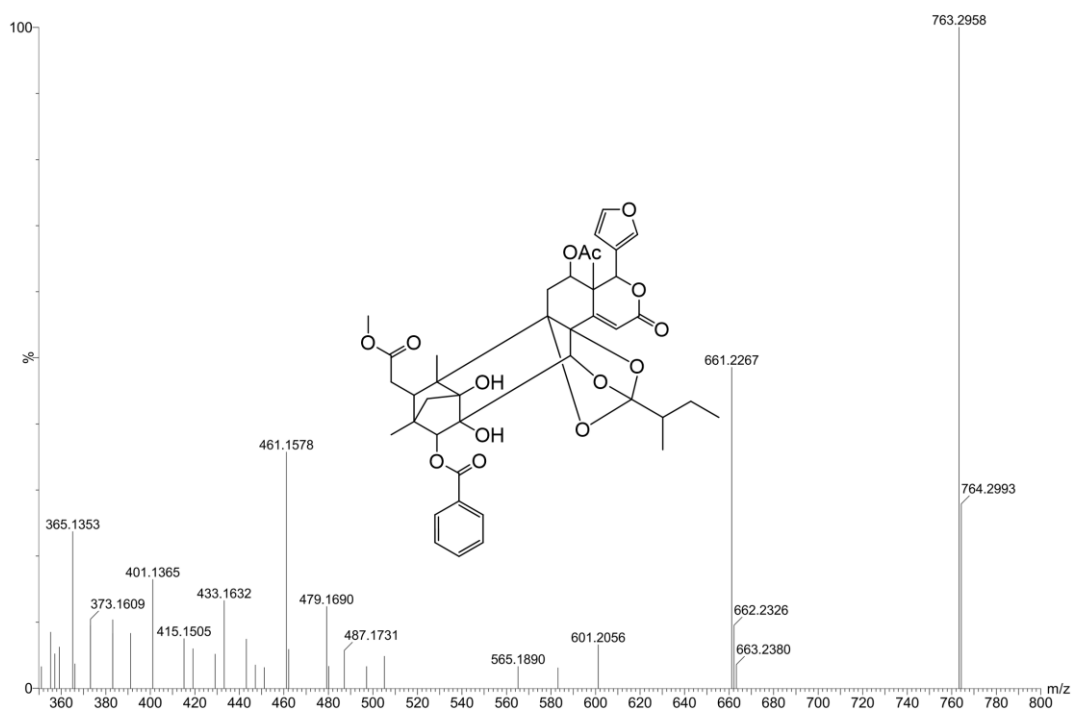

Figure S11. Fragmentation pattern of limonoid **10** computed from tandem MS data.

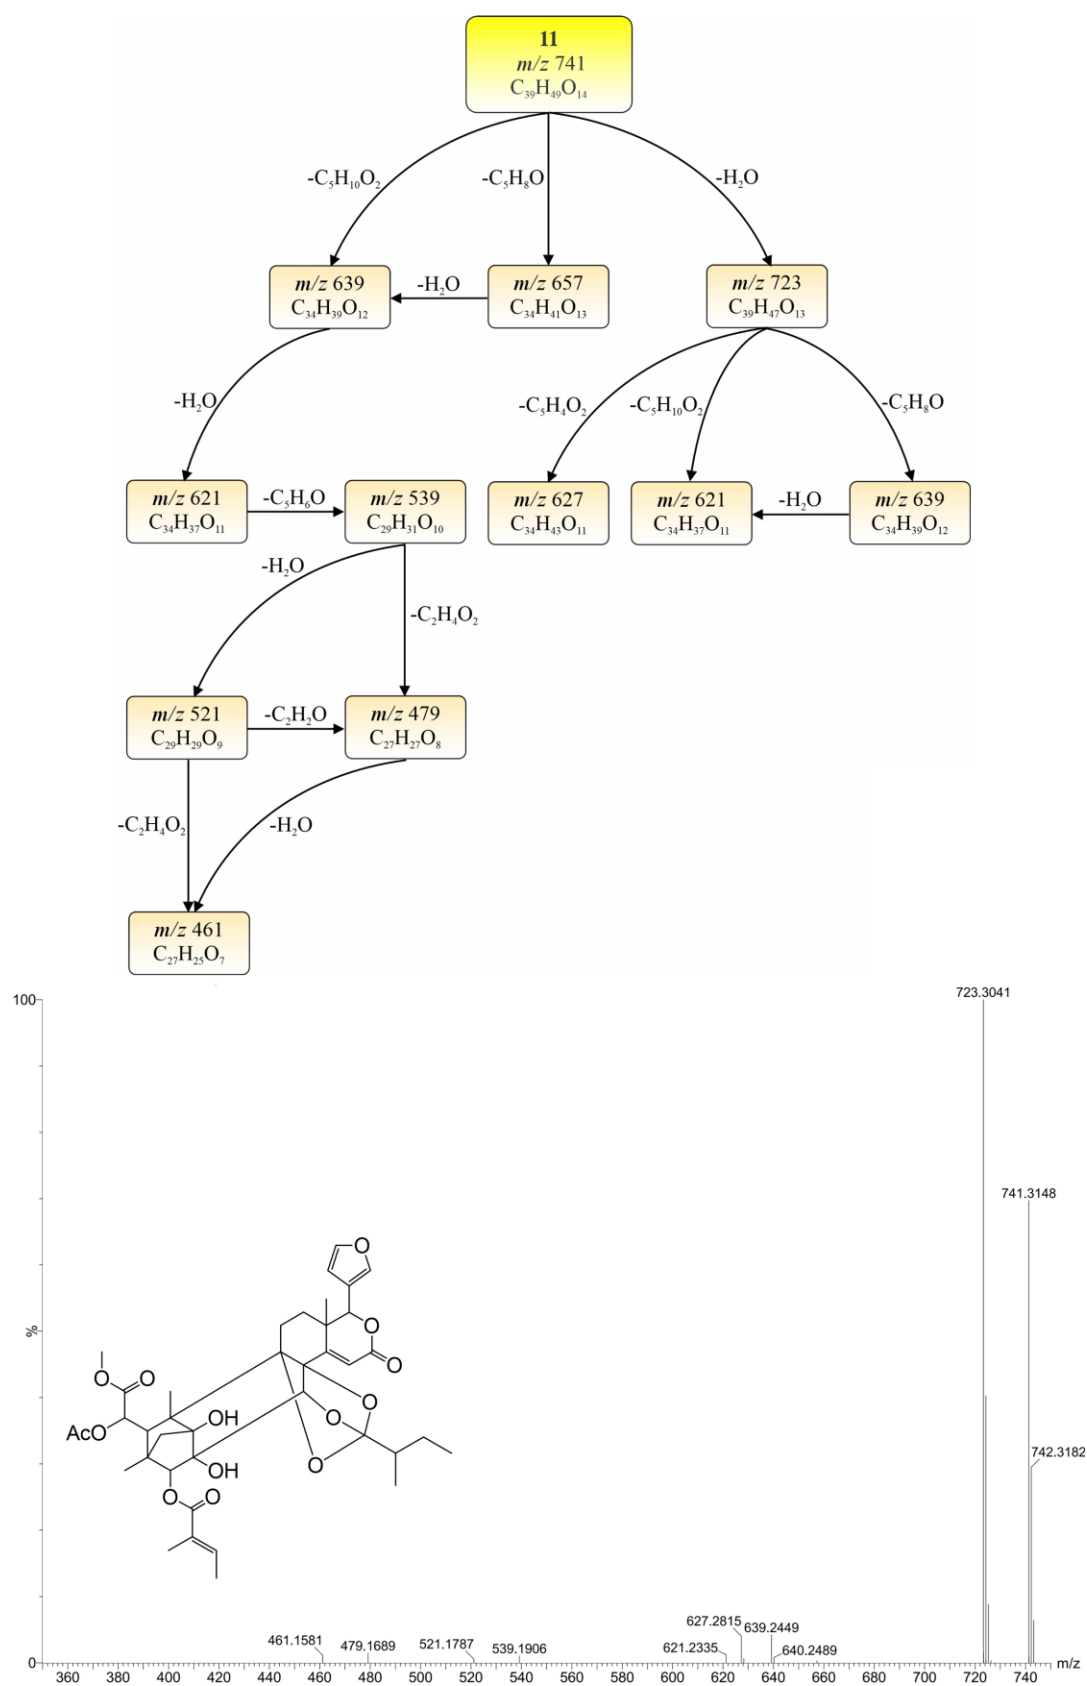

**Figure S12.** Fragmentation pattern of limonoid 11 computed from tandem MS data.

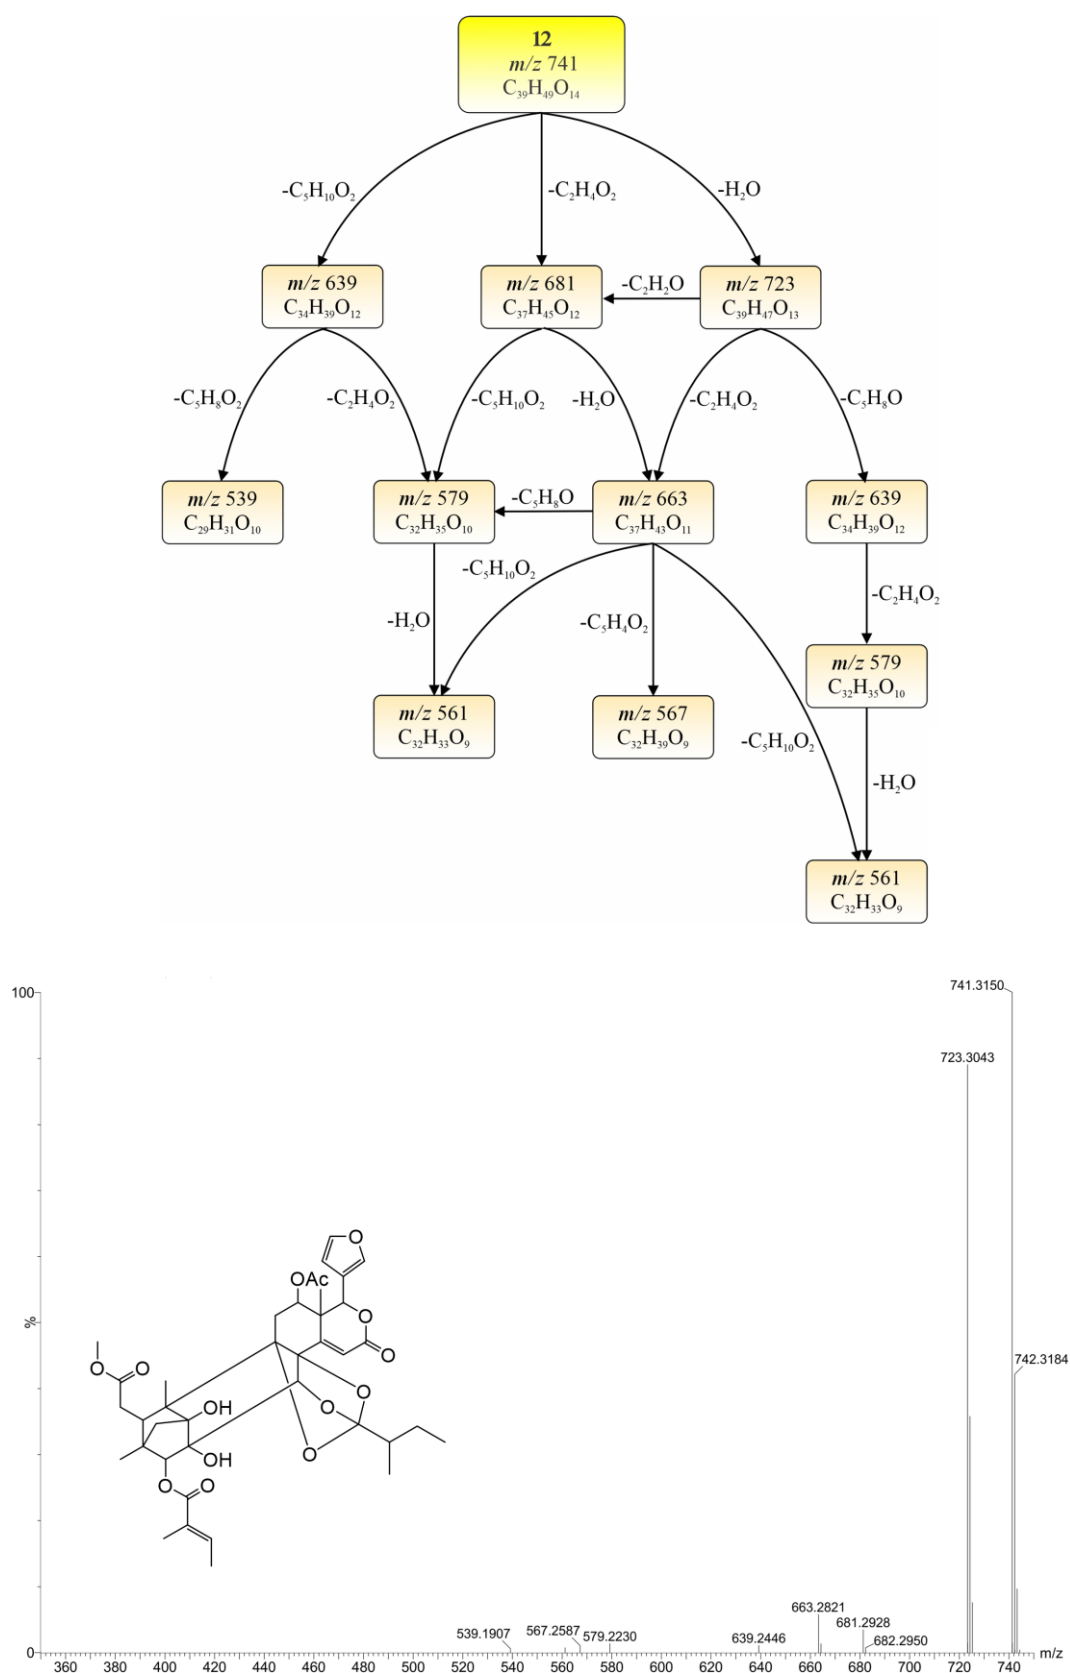

**Figure S13.** Fragmentation pattern of limonoid **12** computed from tandem MS data.



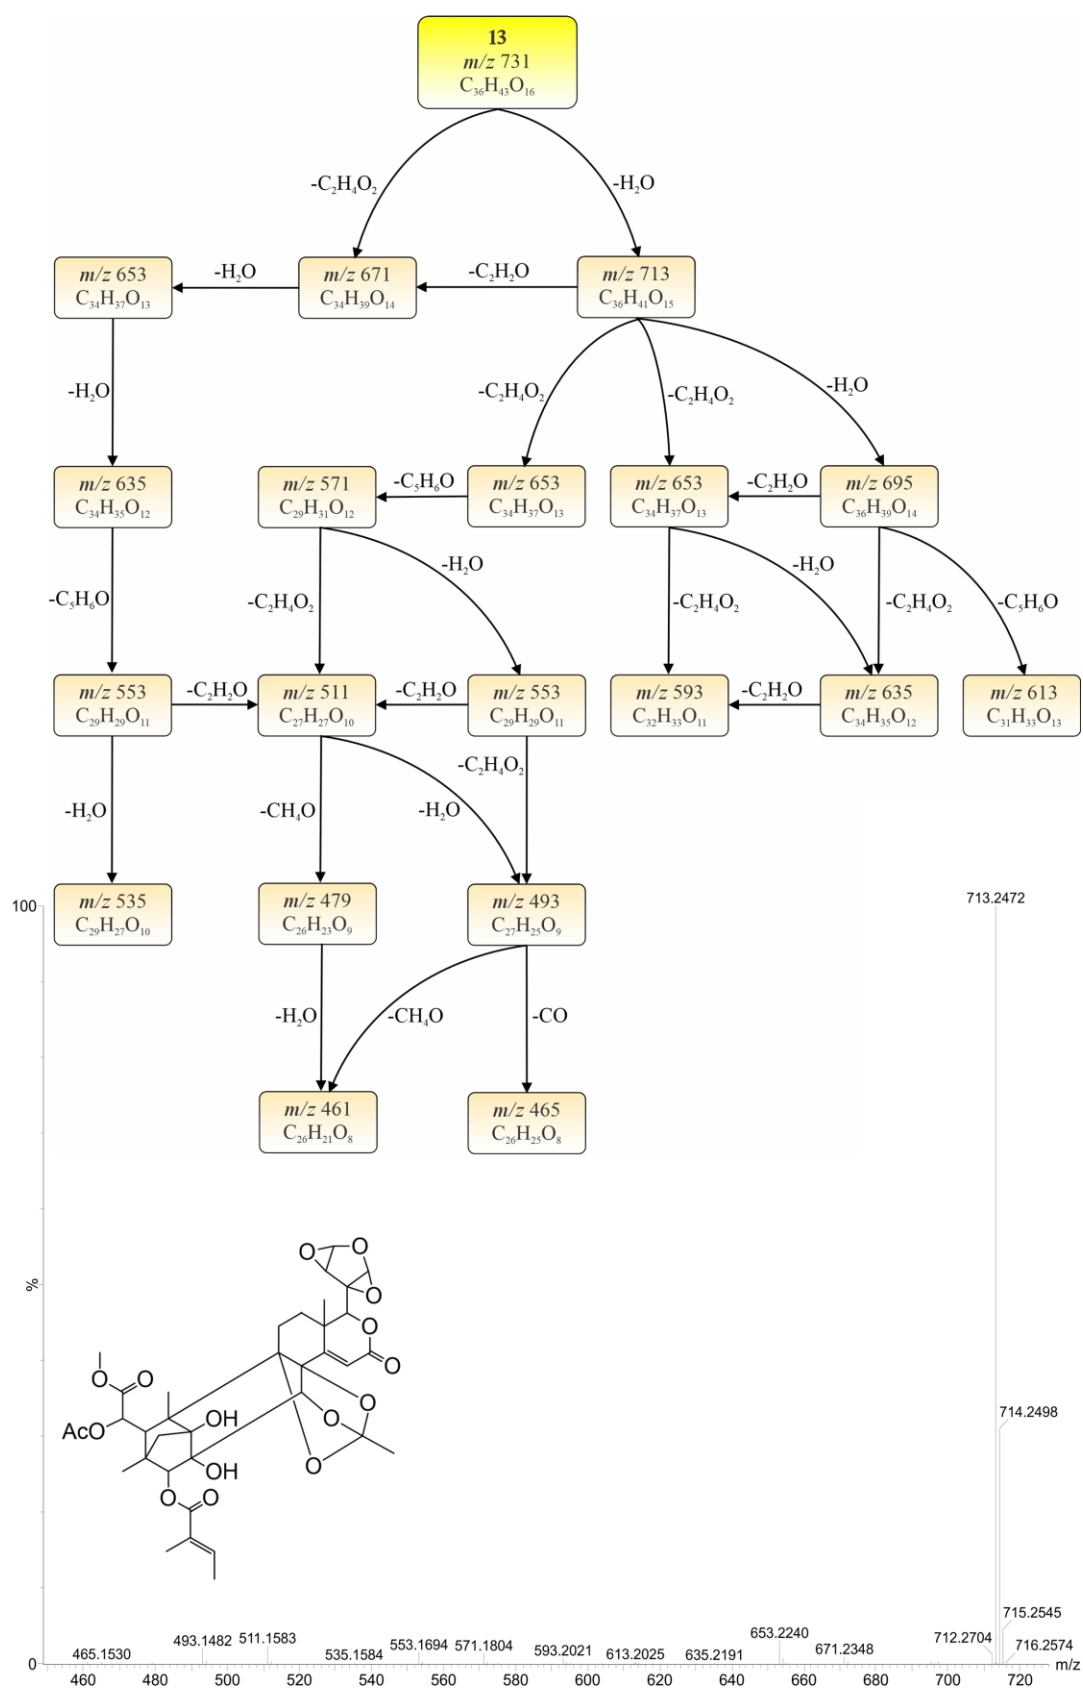

**Figure S14.** Fragmentation pattern of limonoid 13 computed from tandem MS data.

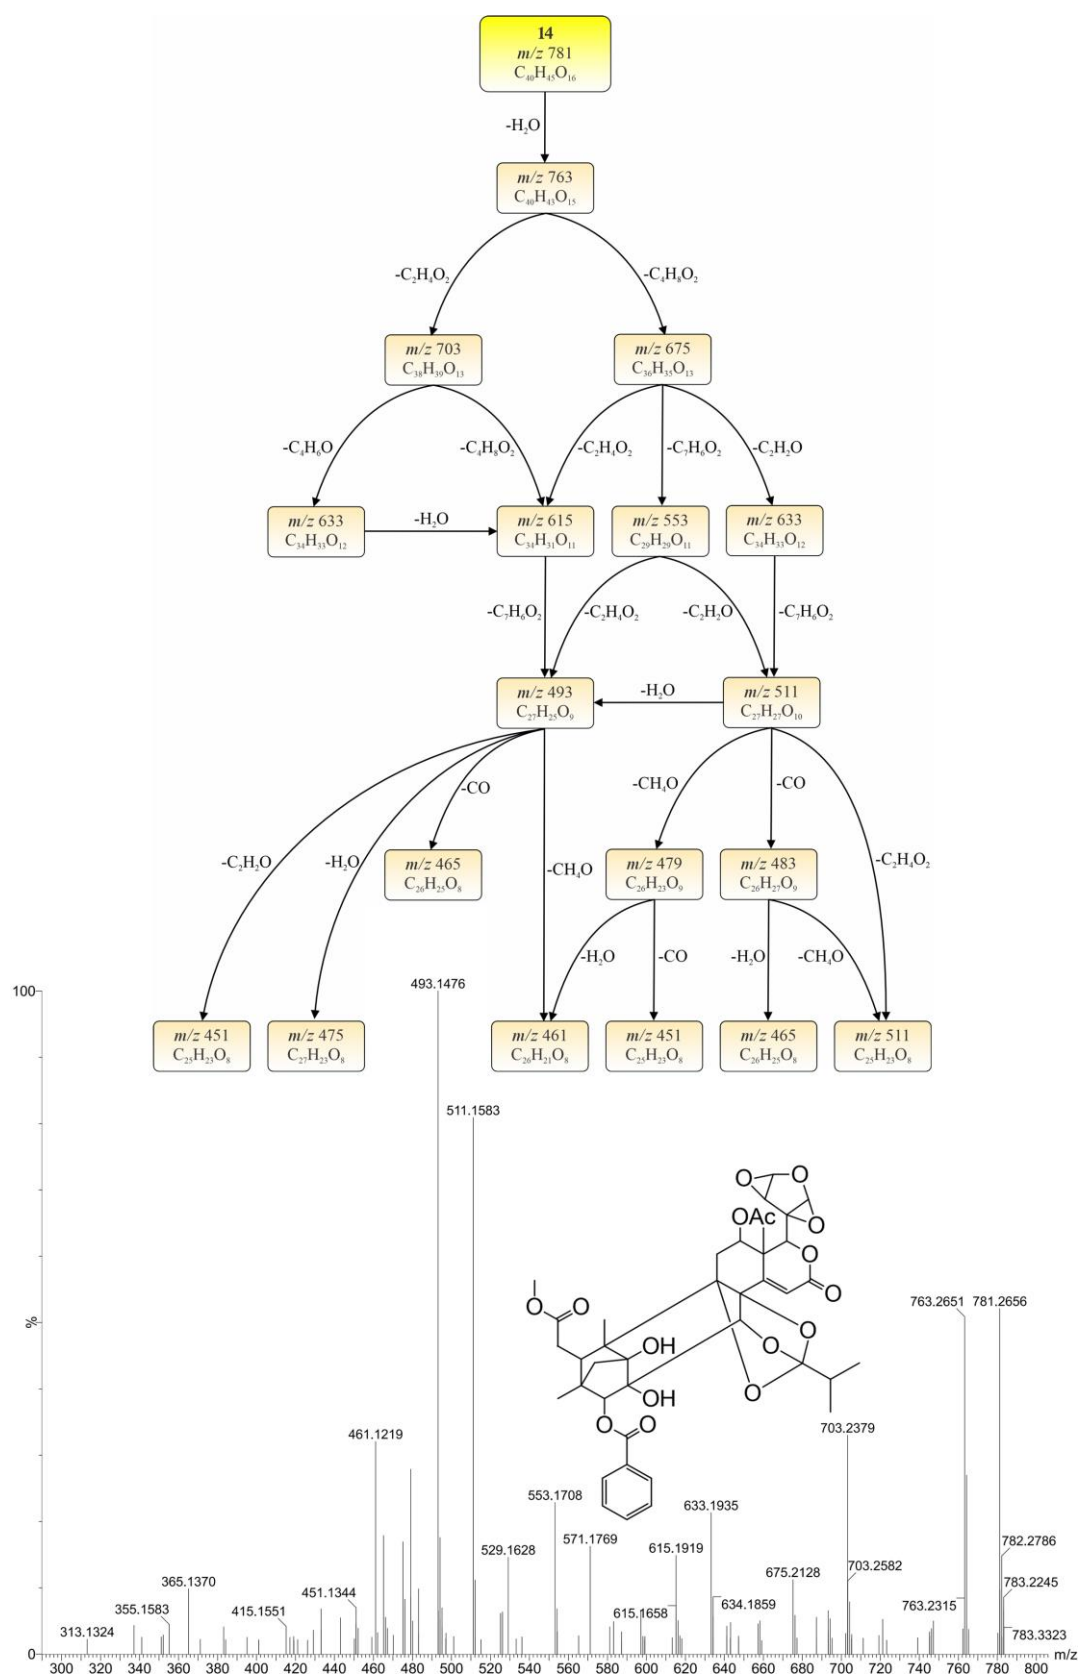

Figure S15. Fragmentation pattern of limonoid 14 computed from tandem MS data.

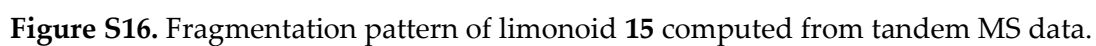

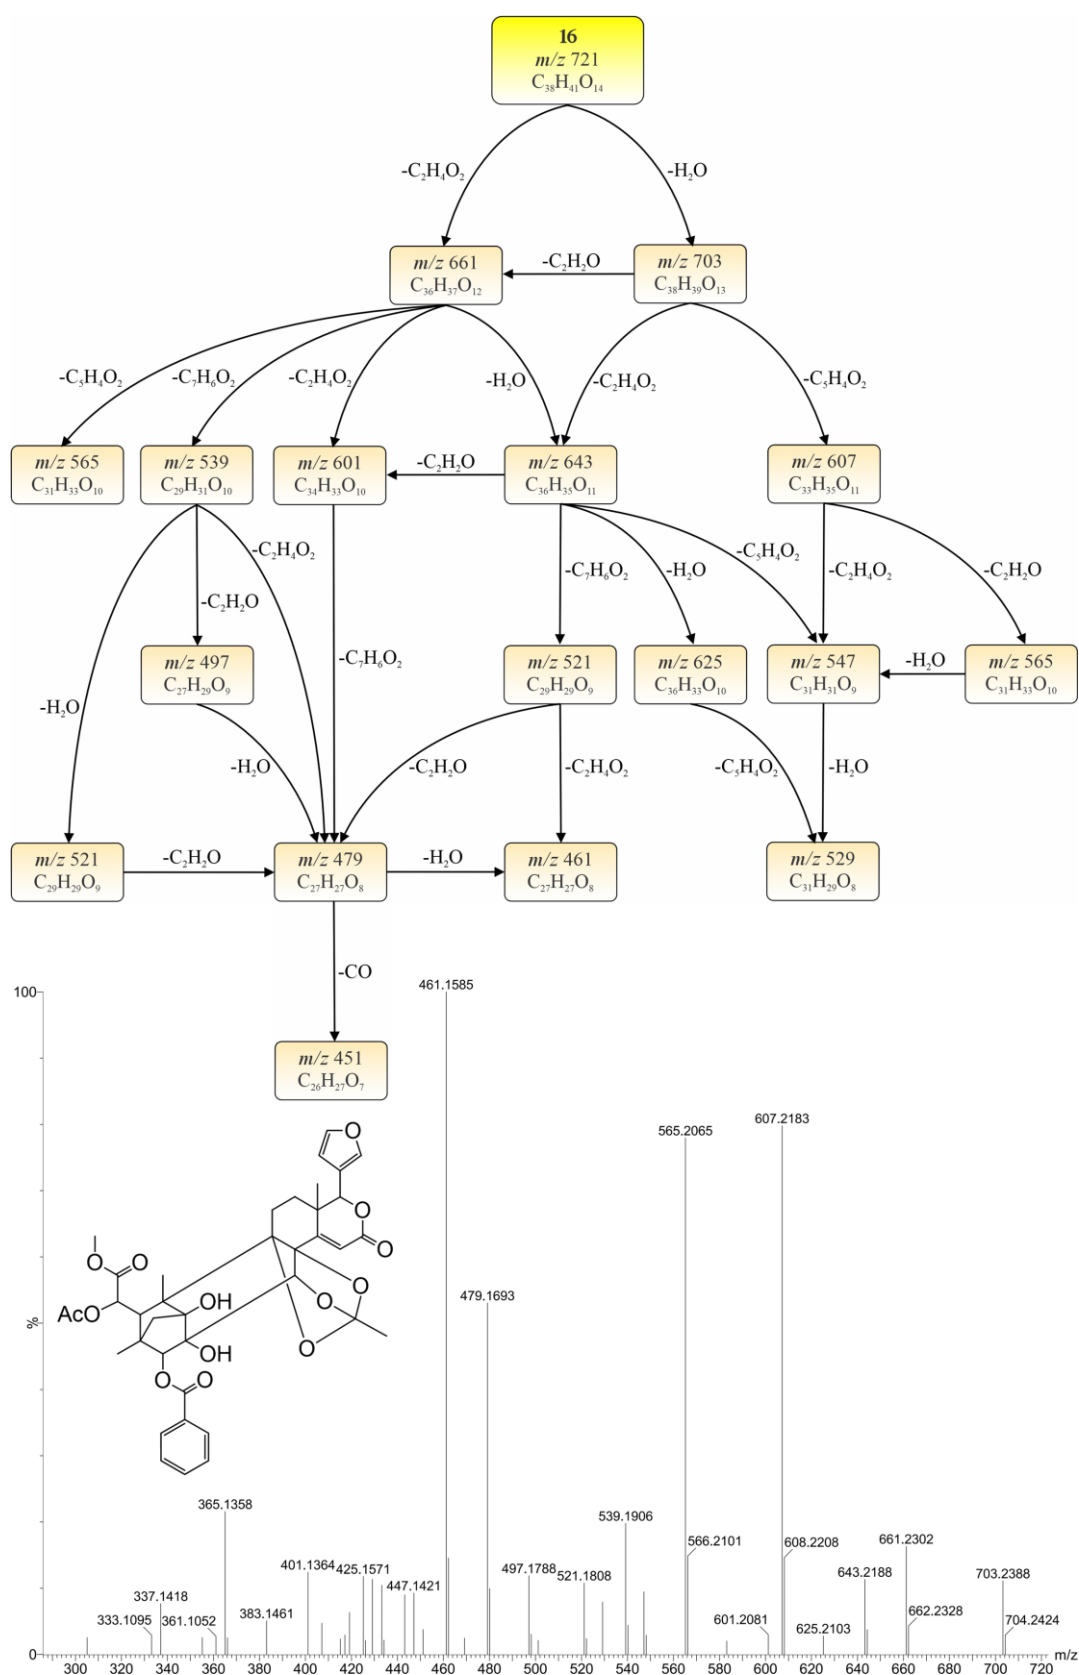

Figure S17. Fragmentation pattern of limonoid 16 computed from tandem MS data.

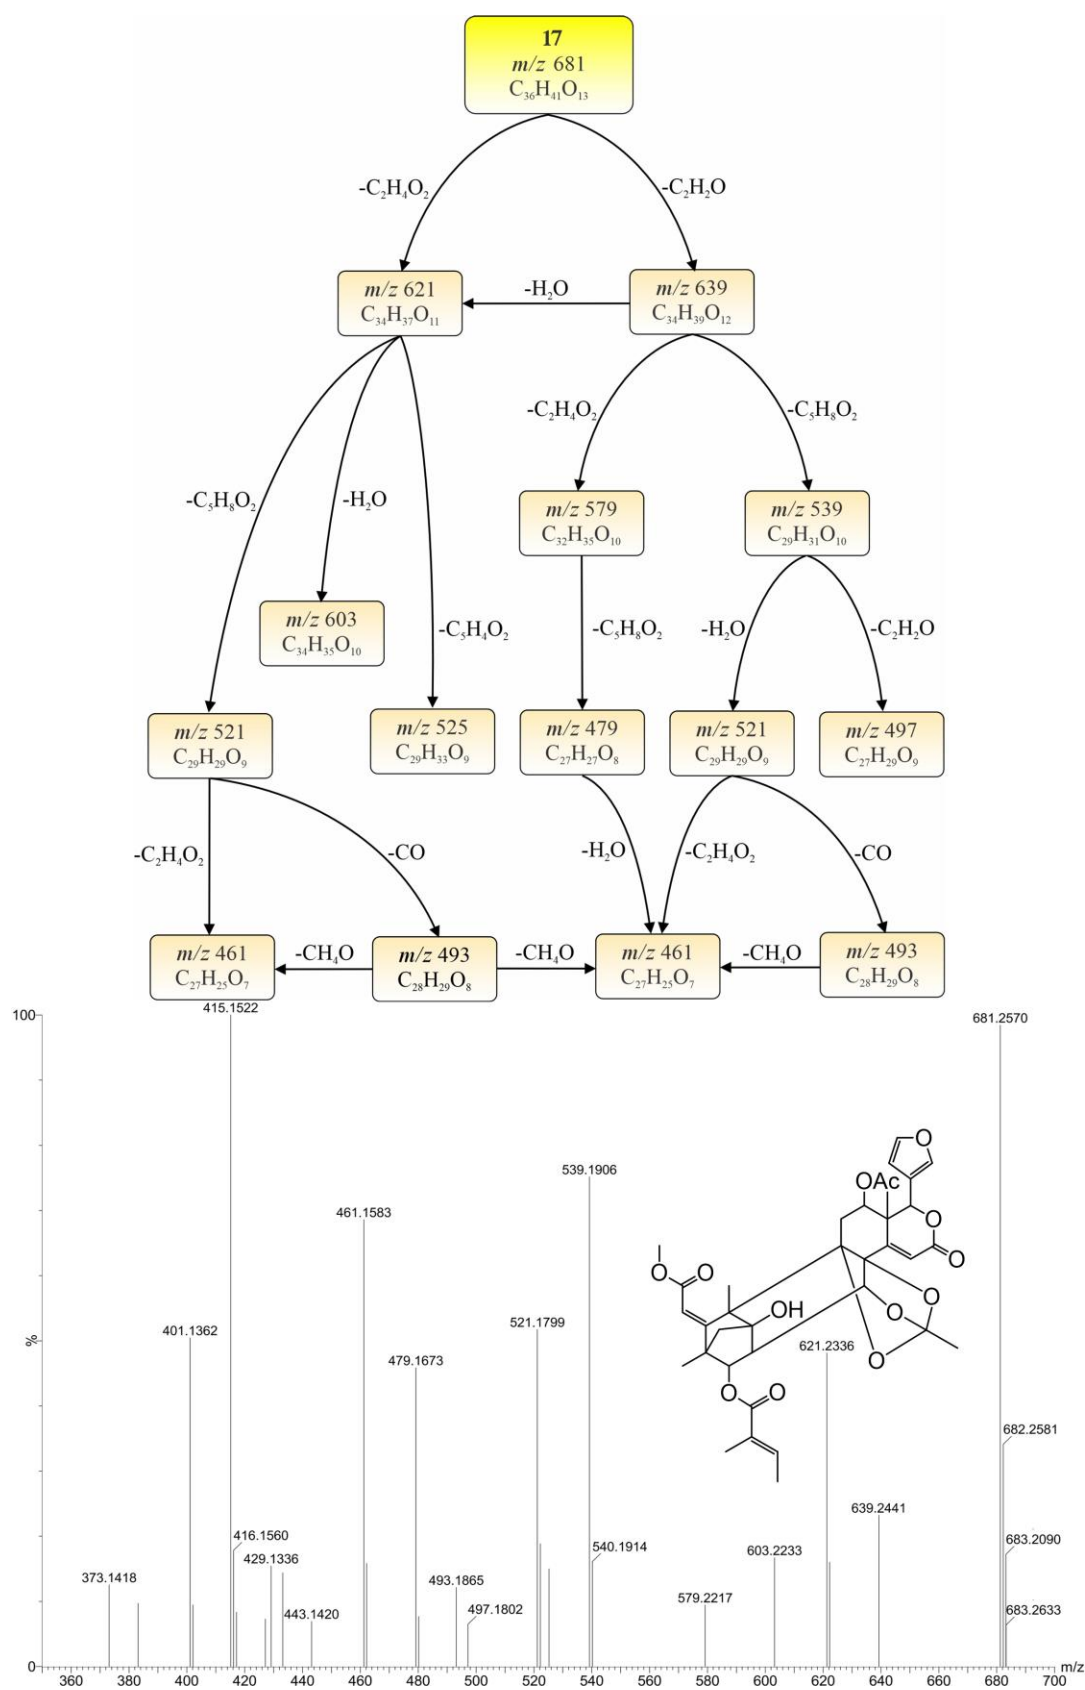

Figure S18. Fragmentation pattern of limonoid 17 computed from tandem MS data.

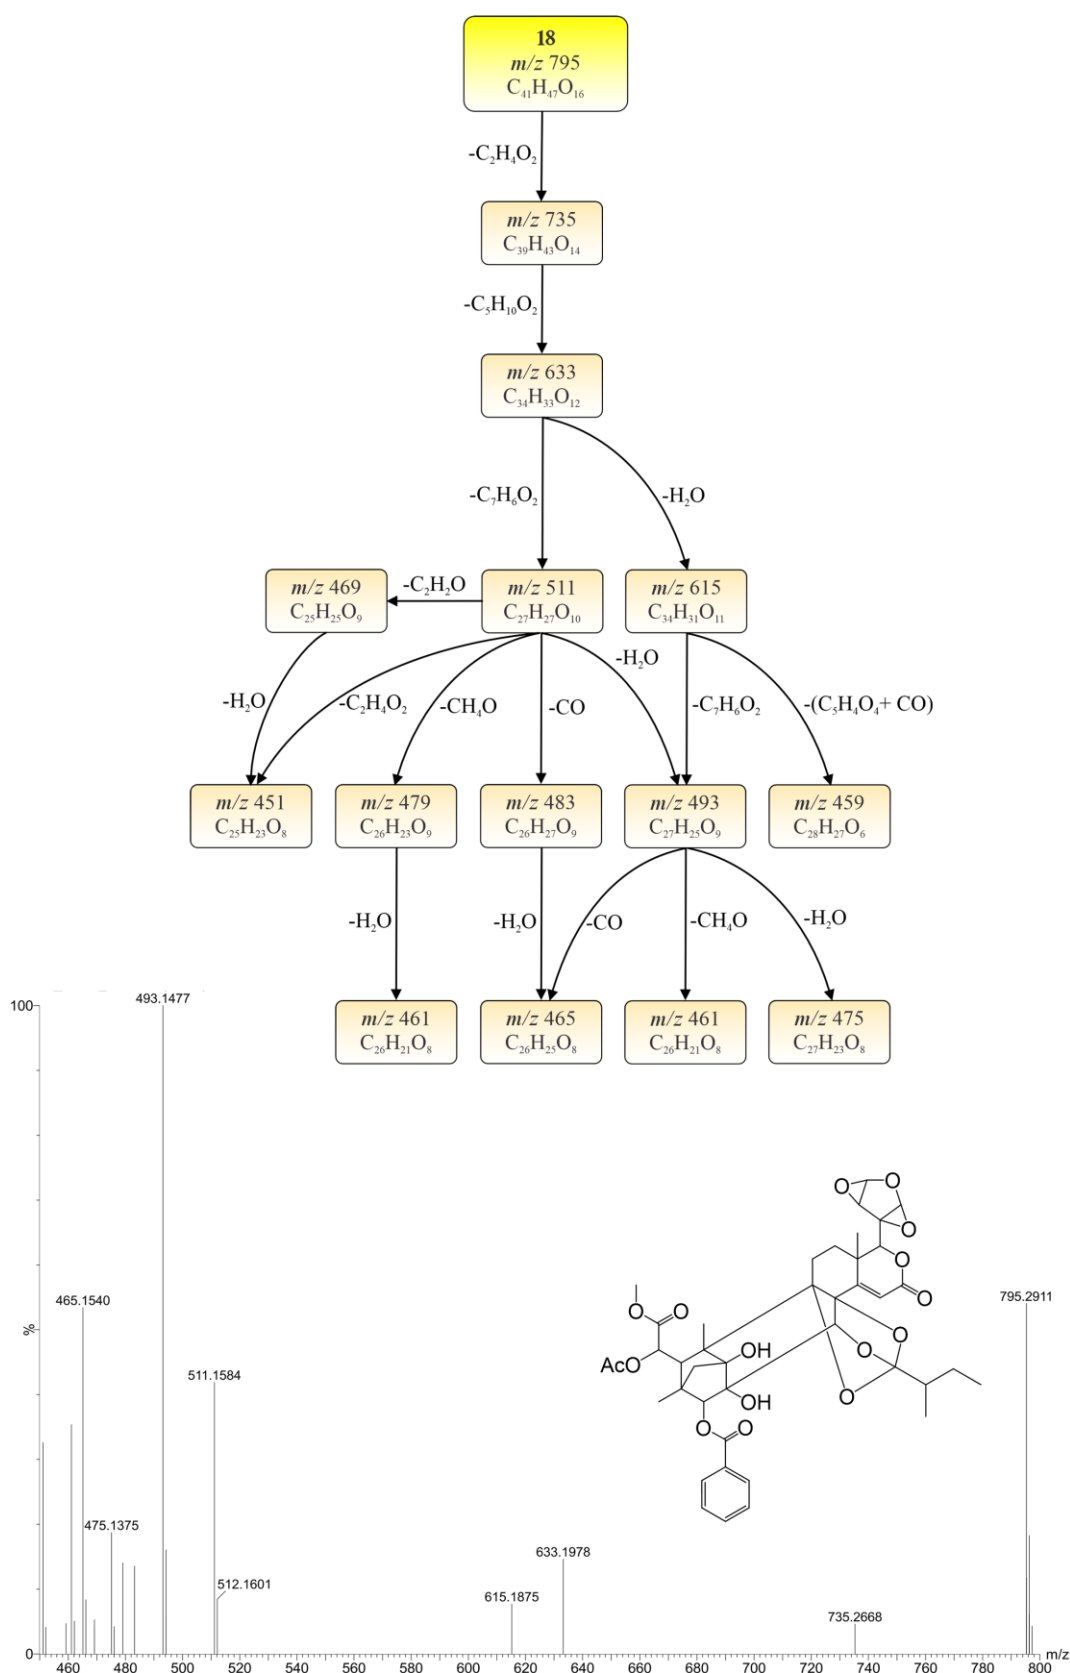

Figure S19. Fragmentation pattern of limonoid 18 computed from tandem MS data.

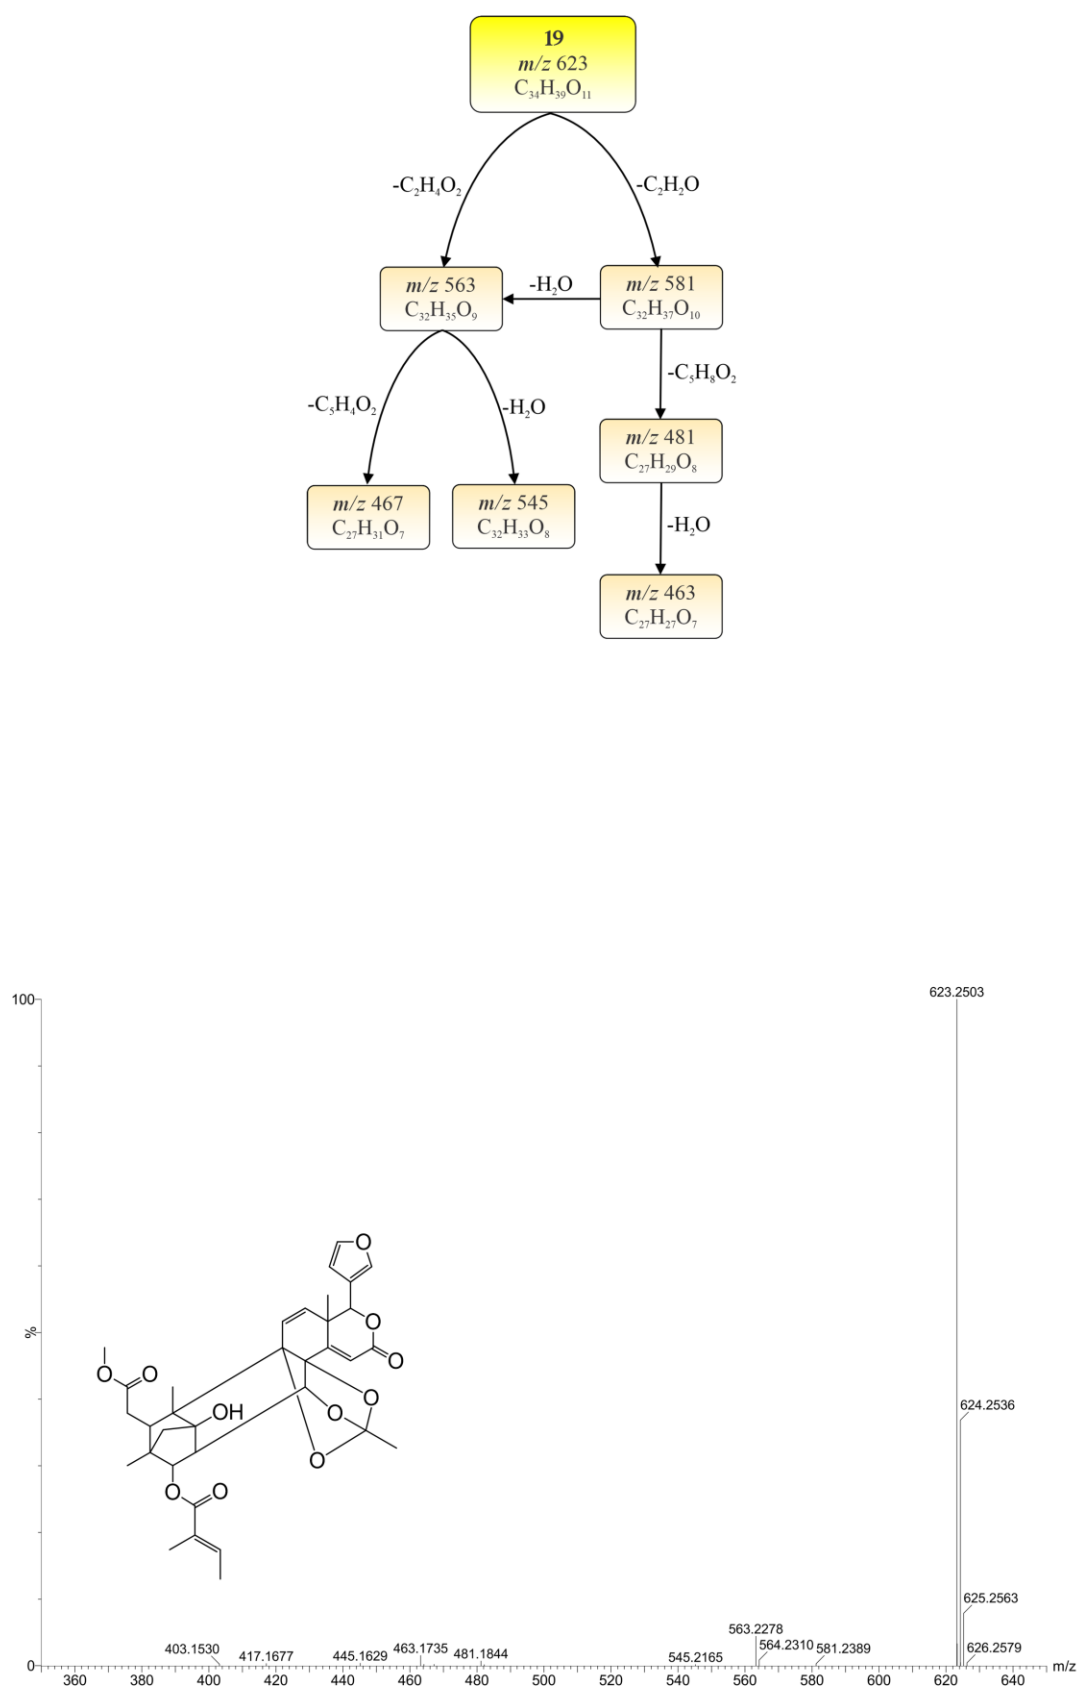

Figure S20. Fragmentation pattern of limonoid 19 computed from tandem MS data.

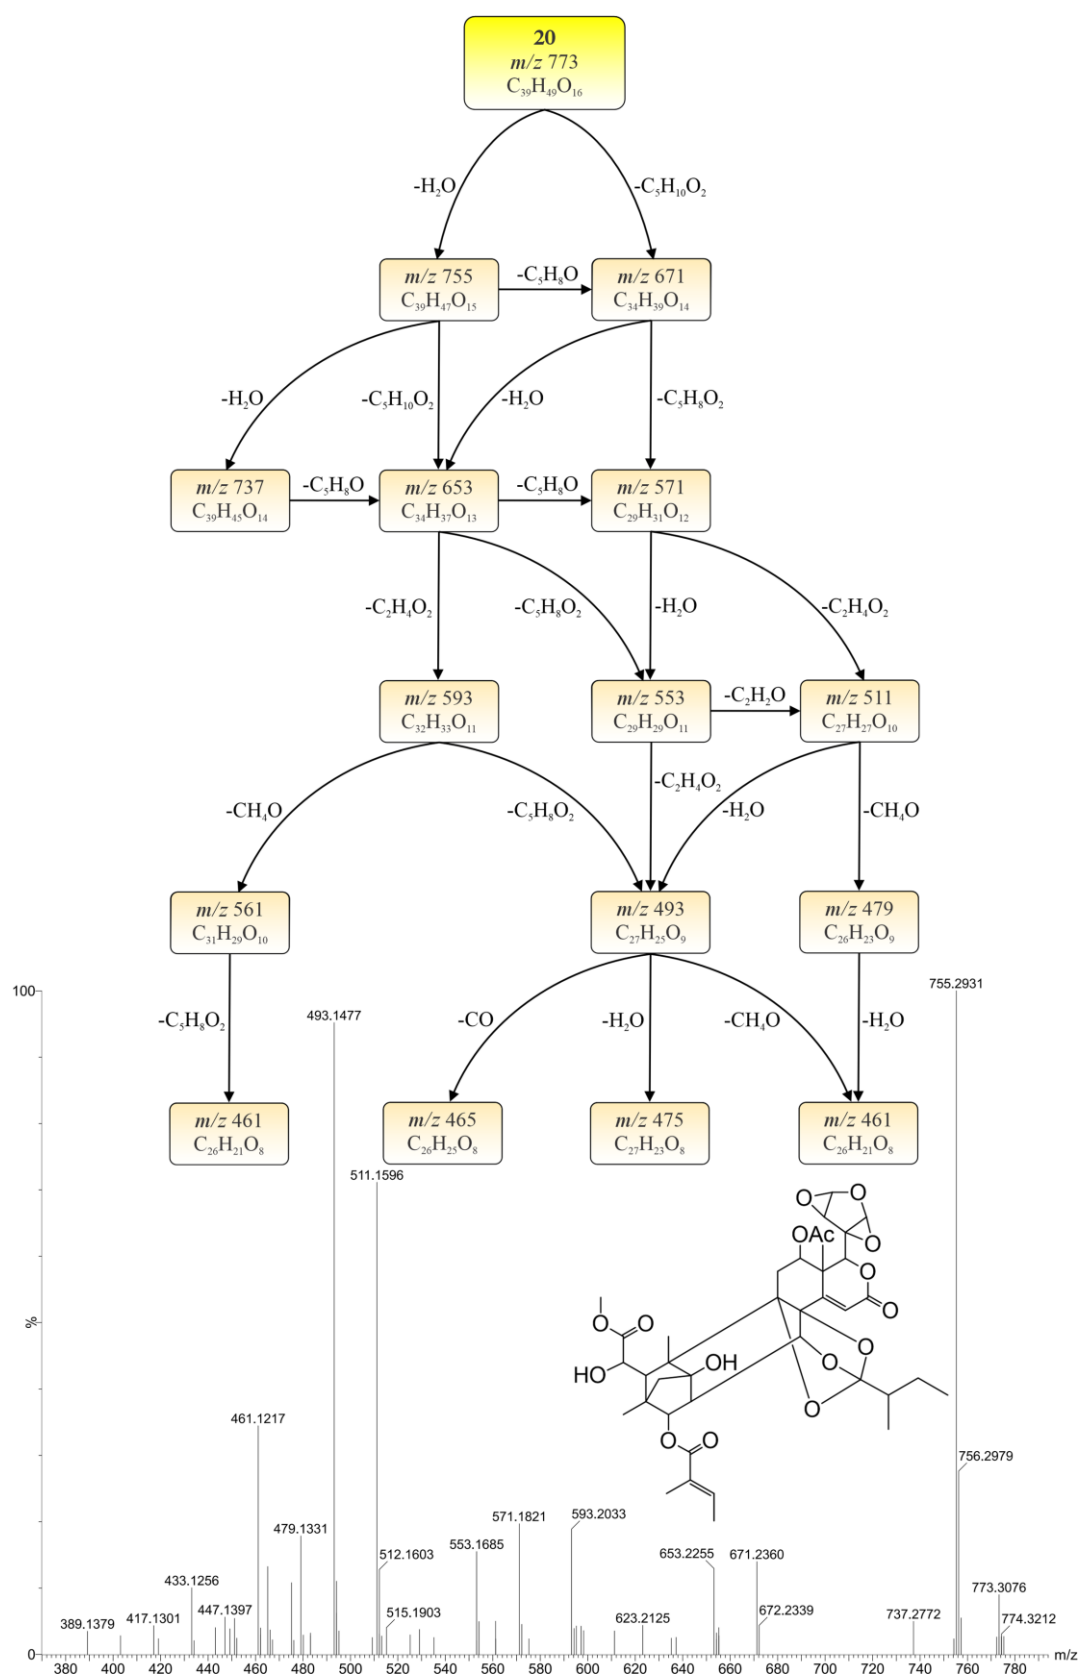

**Figure S21.** Fragmentation pattern of limonoid **20** computed from tandem MS data.



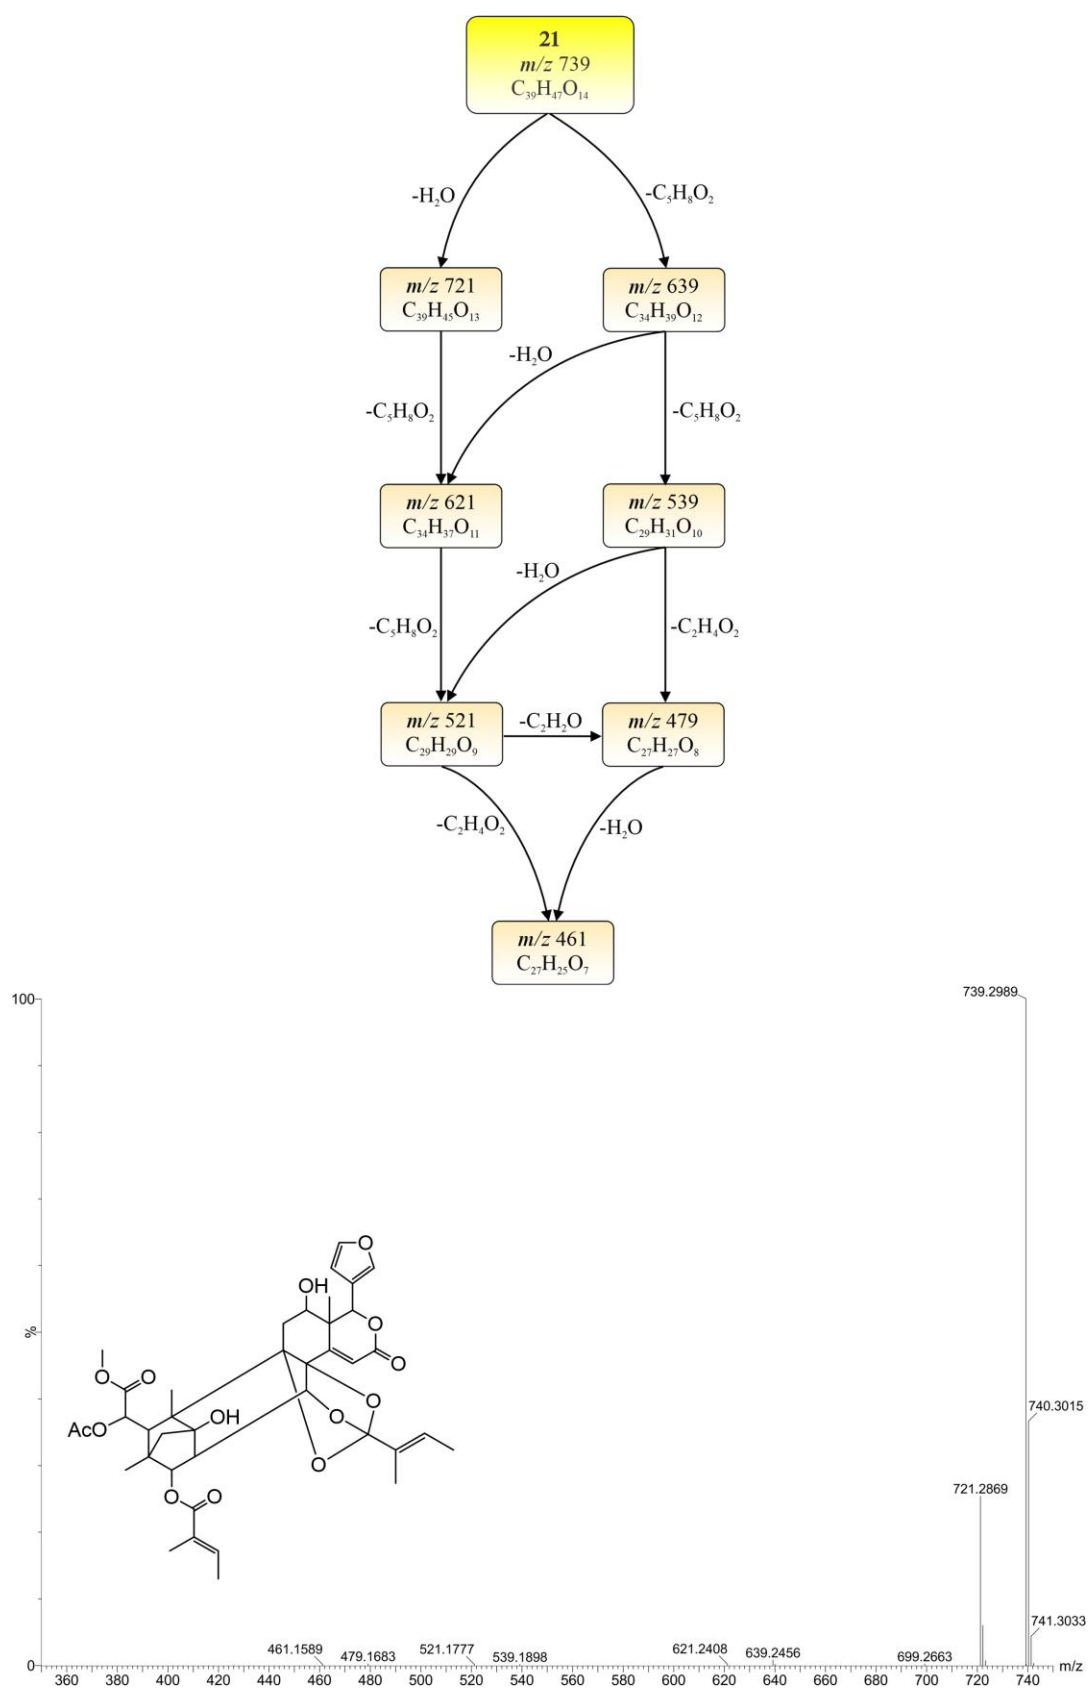

Figure S22. Fragmentation pattern of limonoid 21 computed from tandem MS data.

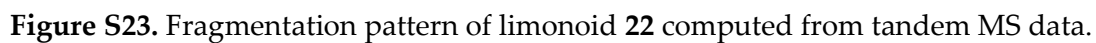

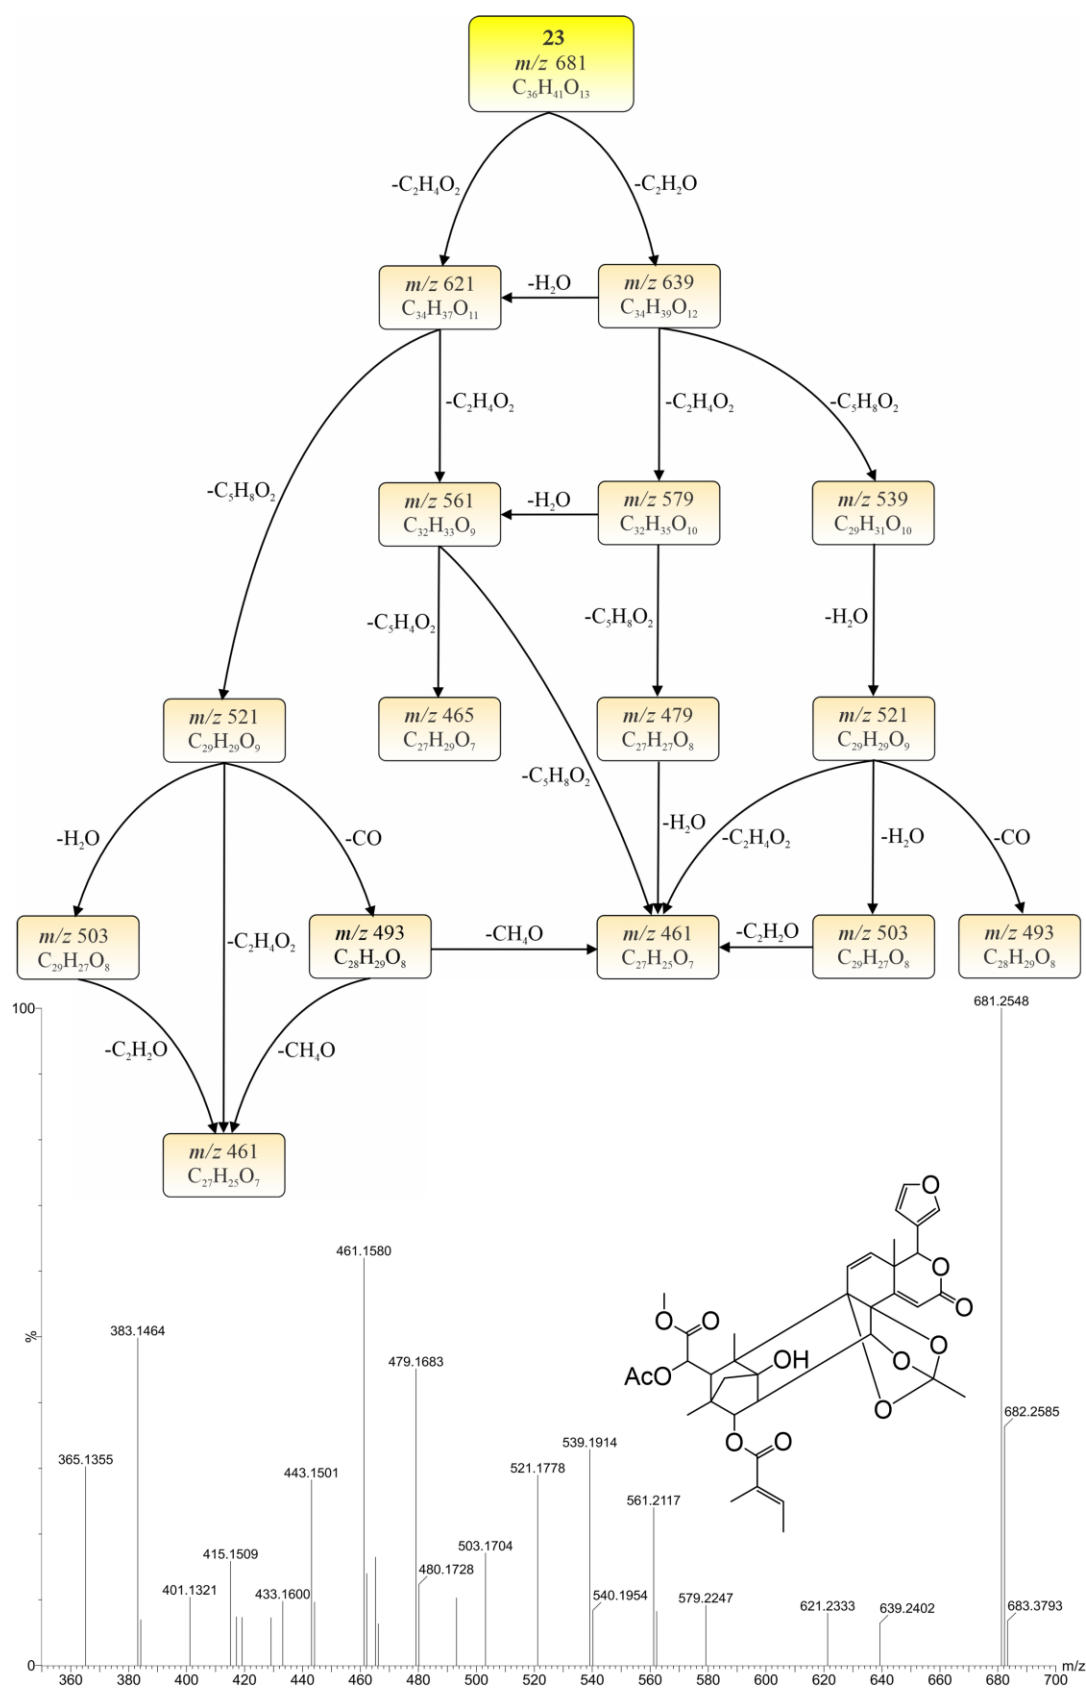

Figure S24. Fragmentation pattern of limonoid **23** computed from tandem MS data.

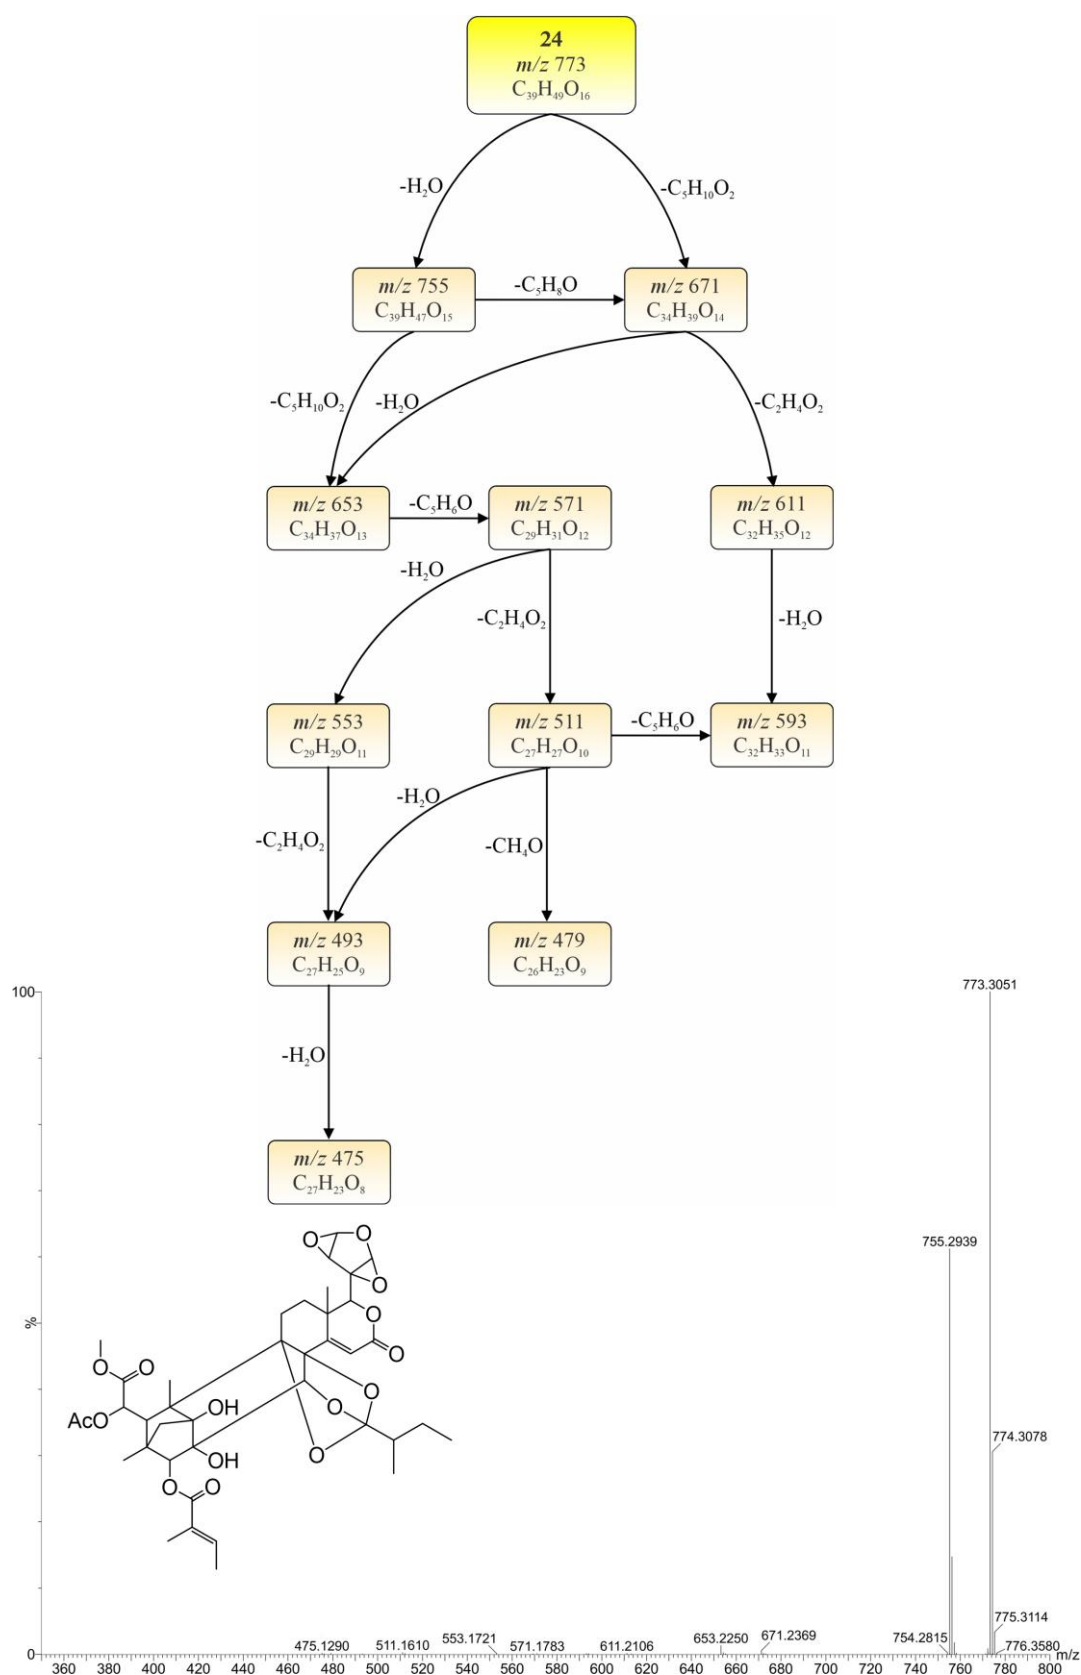

Figure S25. Fragmentation pattern of limonoid 24 computed from tandem MS data.

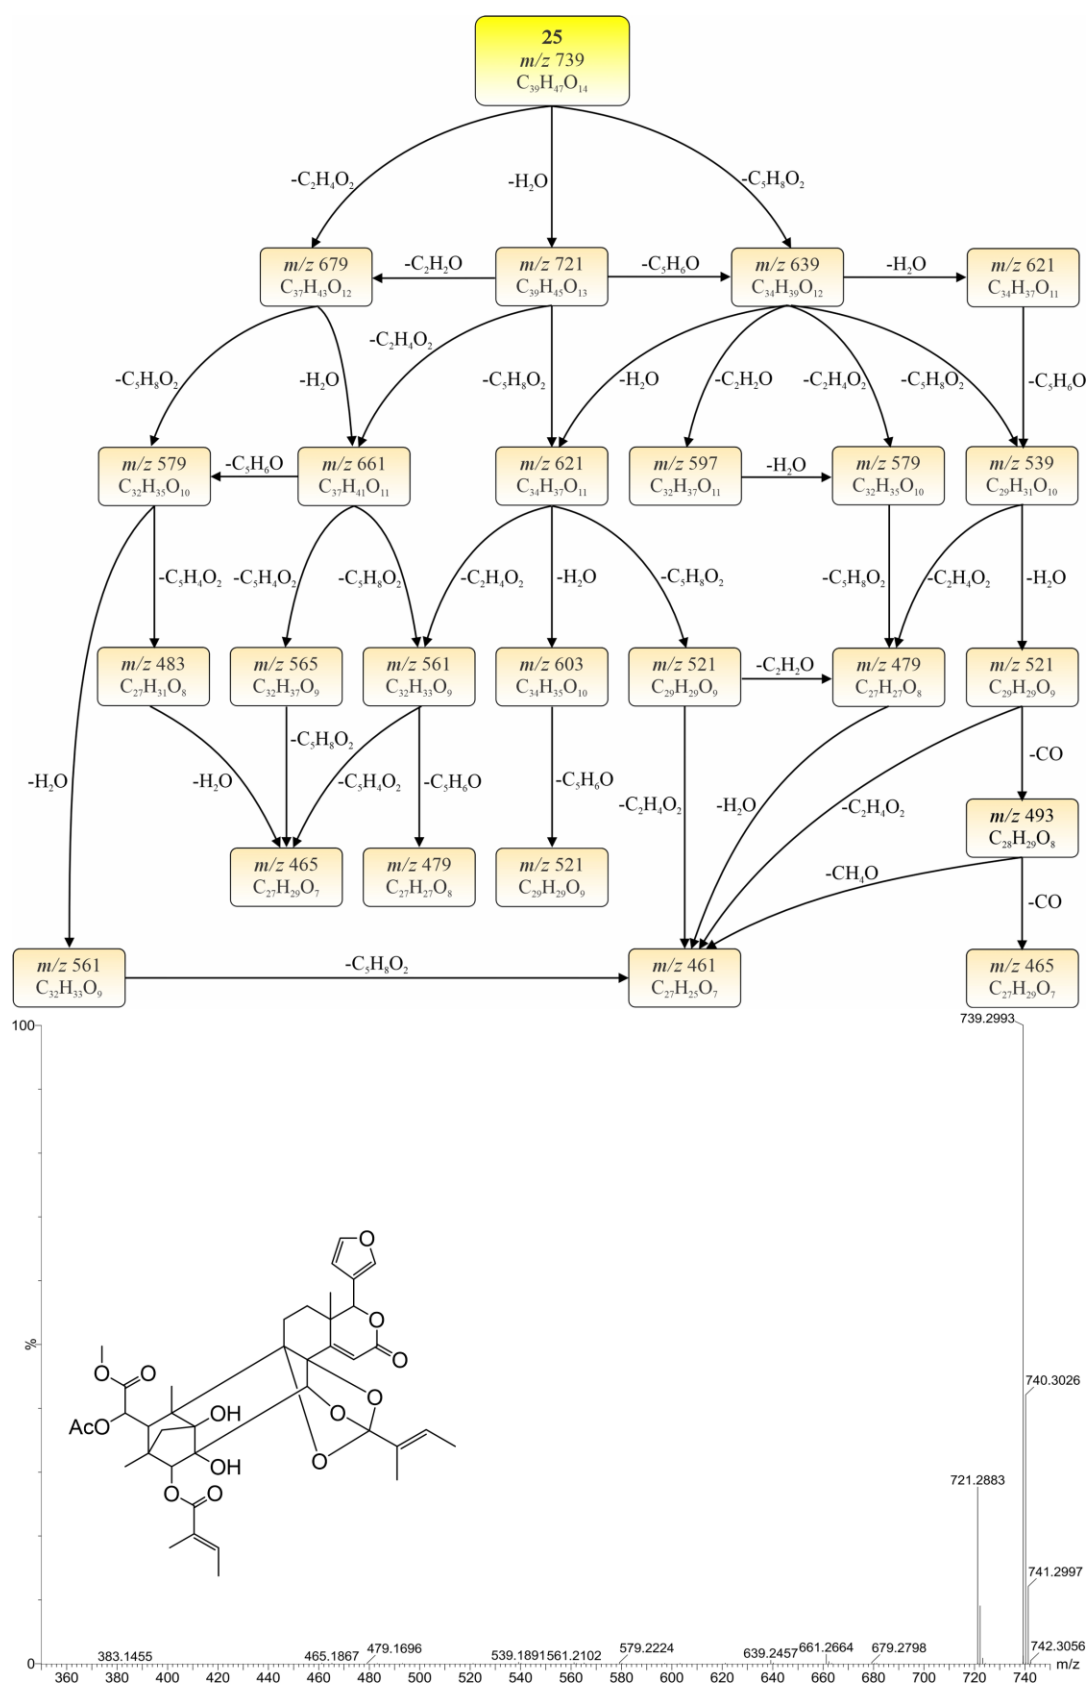

Figure S26. Fragmentation pattern of limonoid **25** computed from tandem MS data.

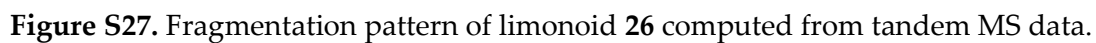

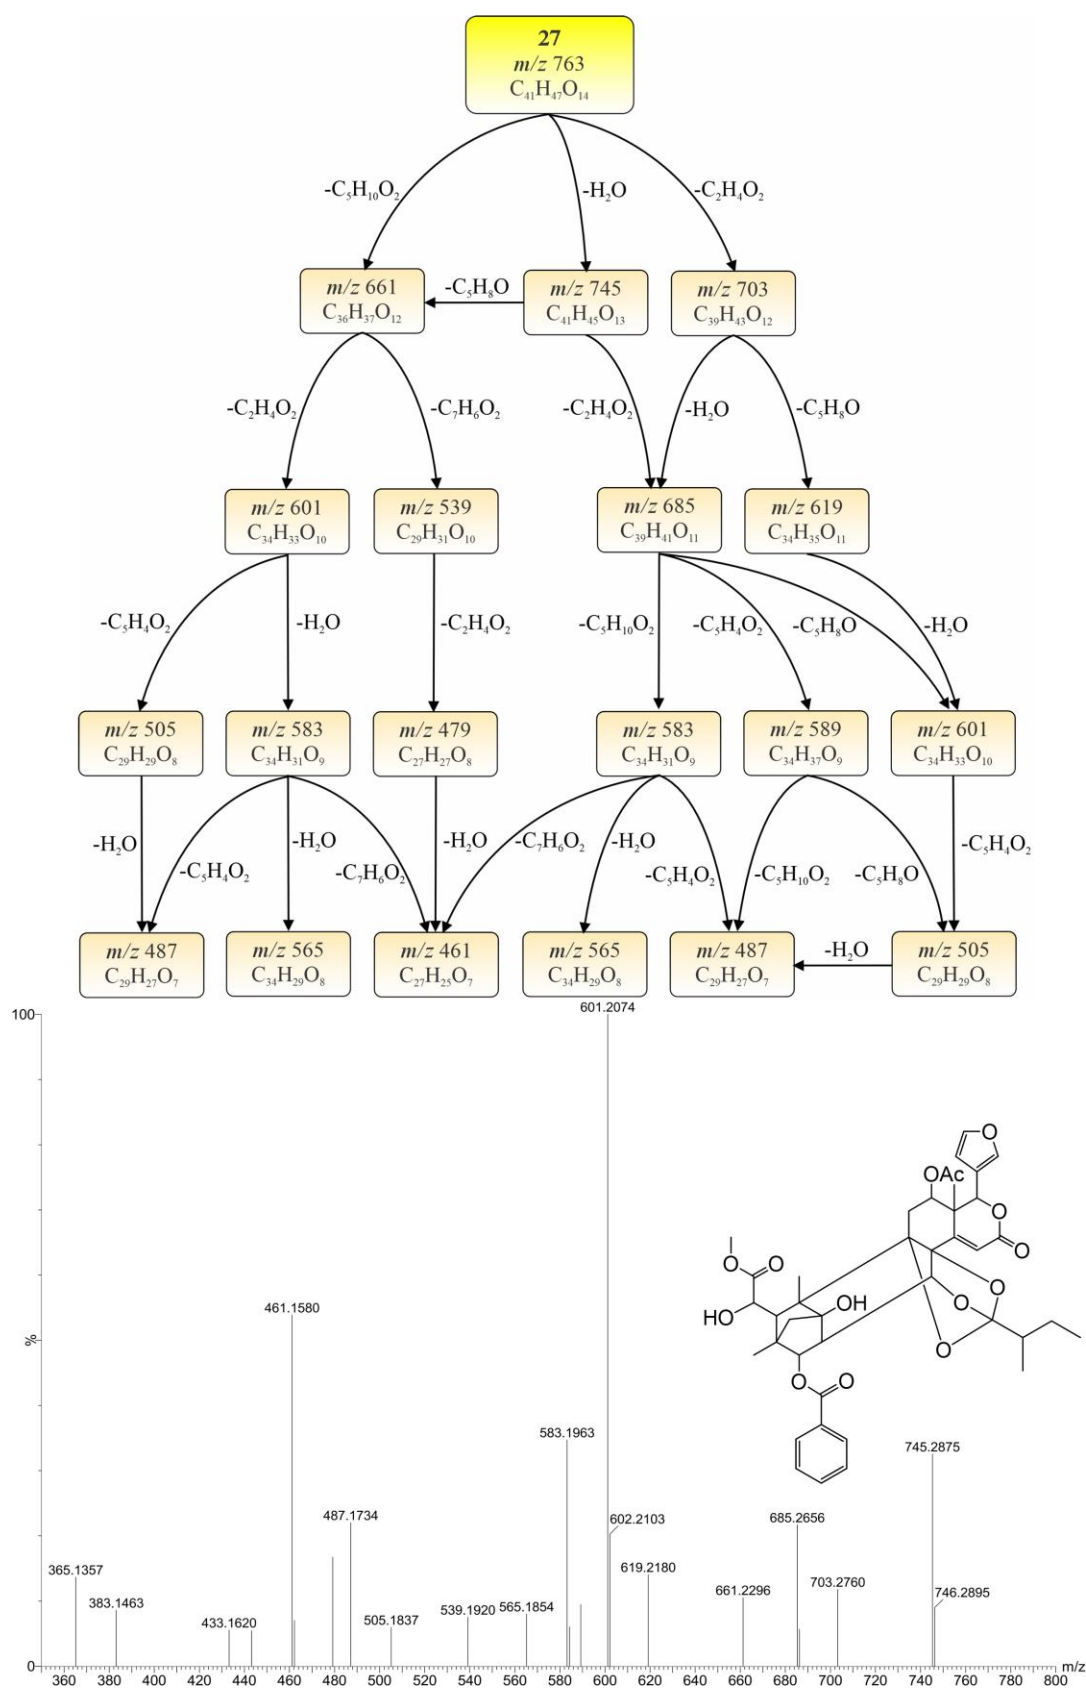

Figure S28. Fragmentation pattern of limonoid **27** computed from tandem MS data.

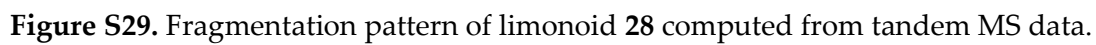



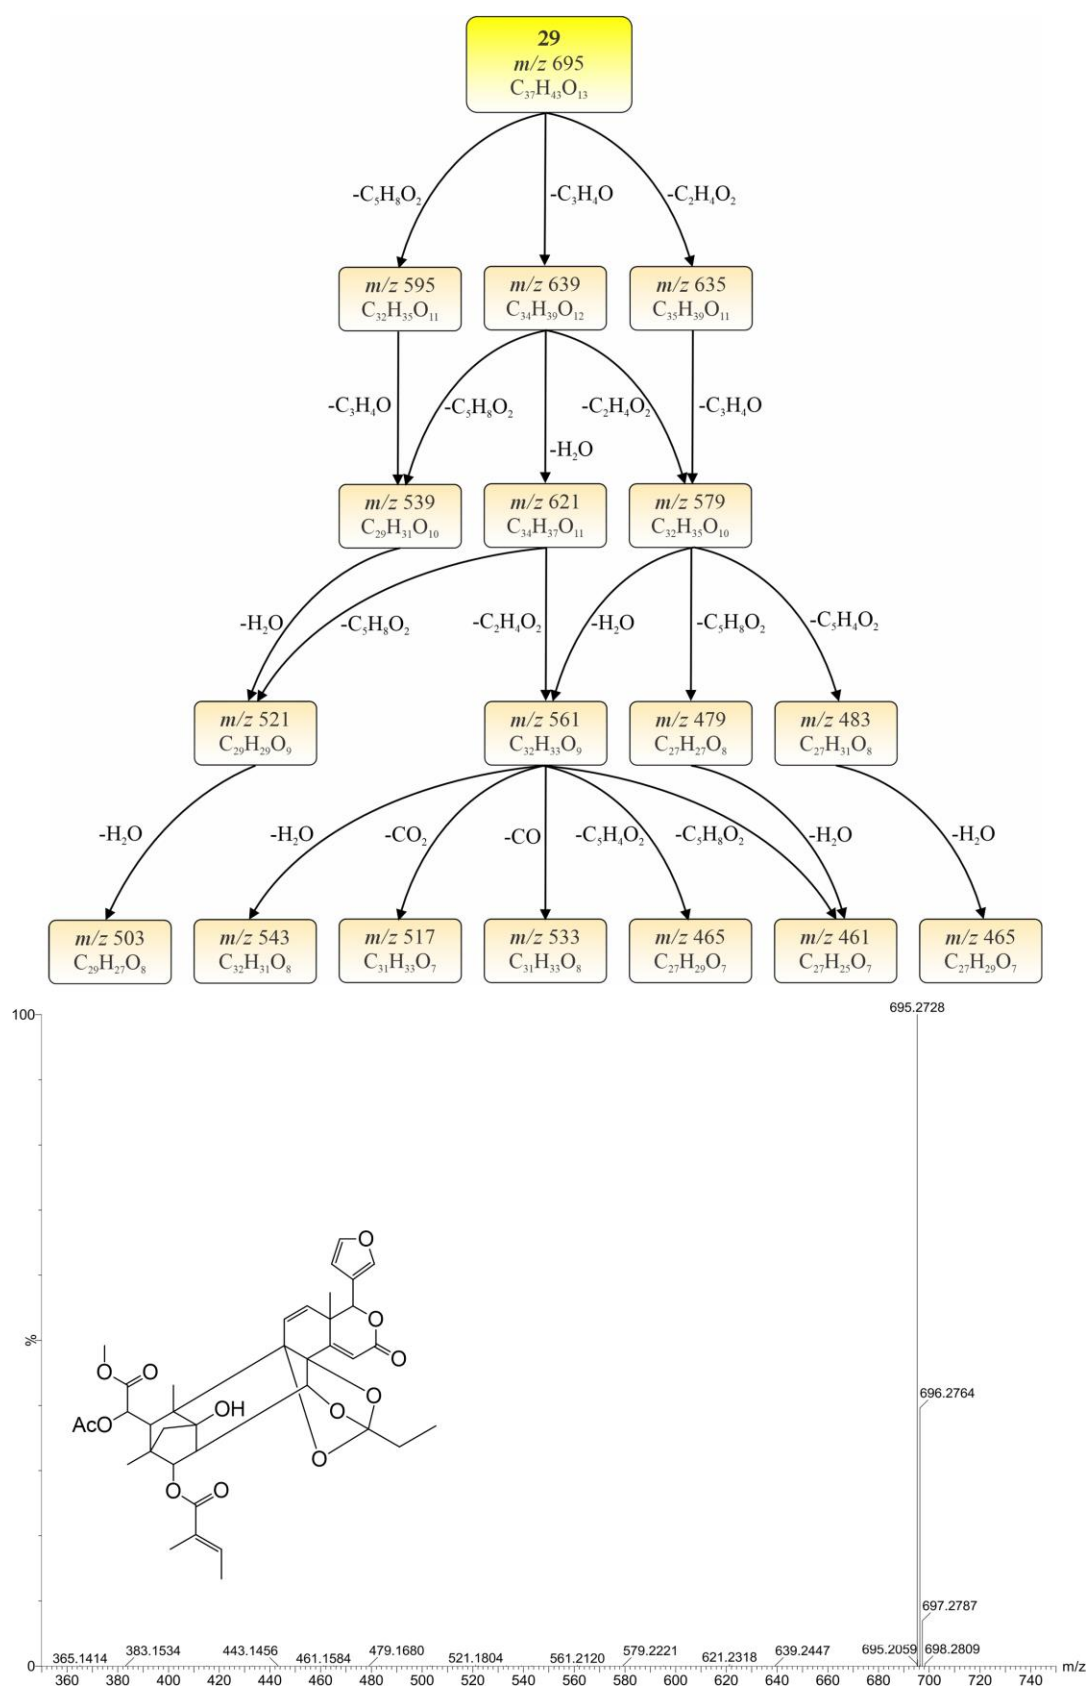

Figure S30. Fragmentation pattern of limonoid **29** computed from tandem MS data.

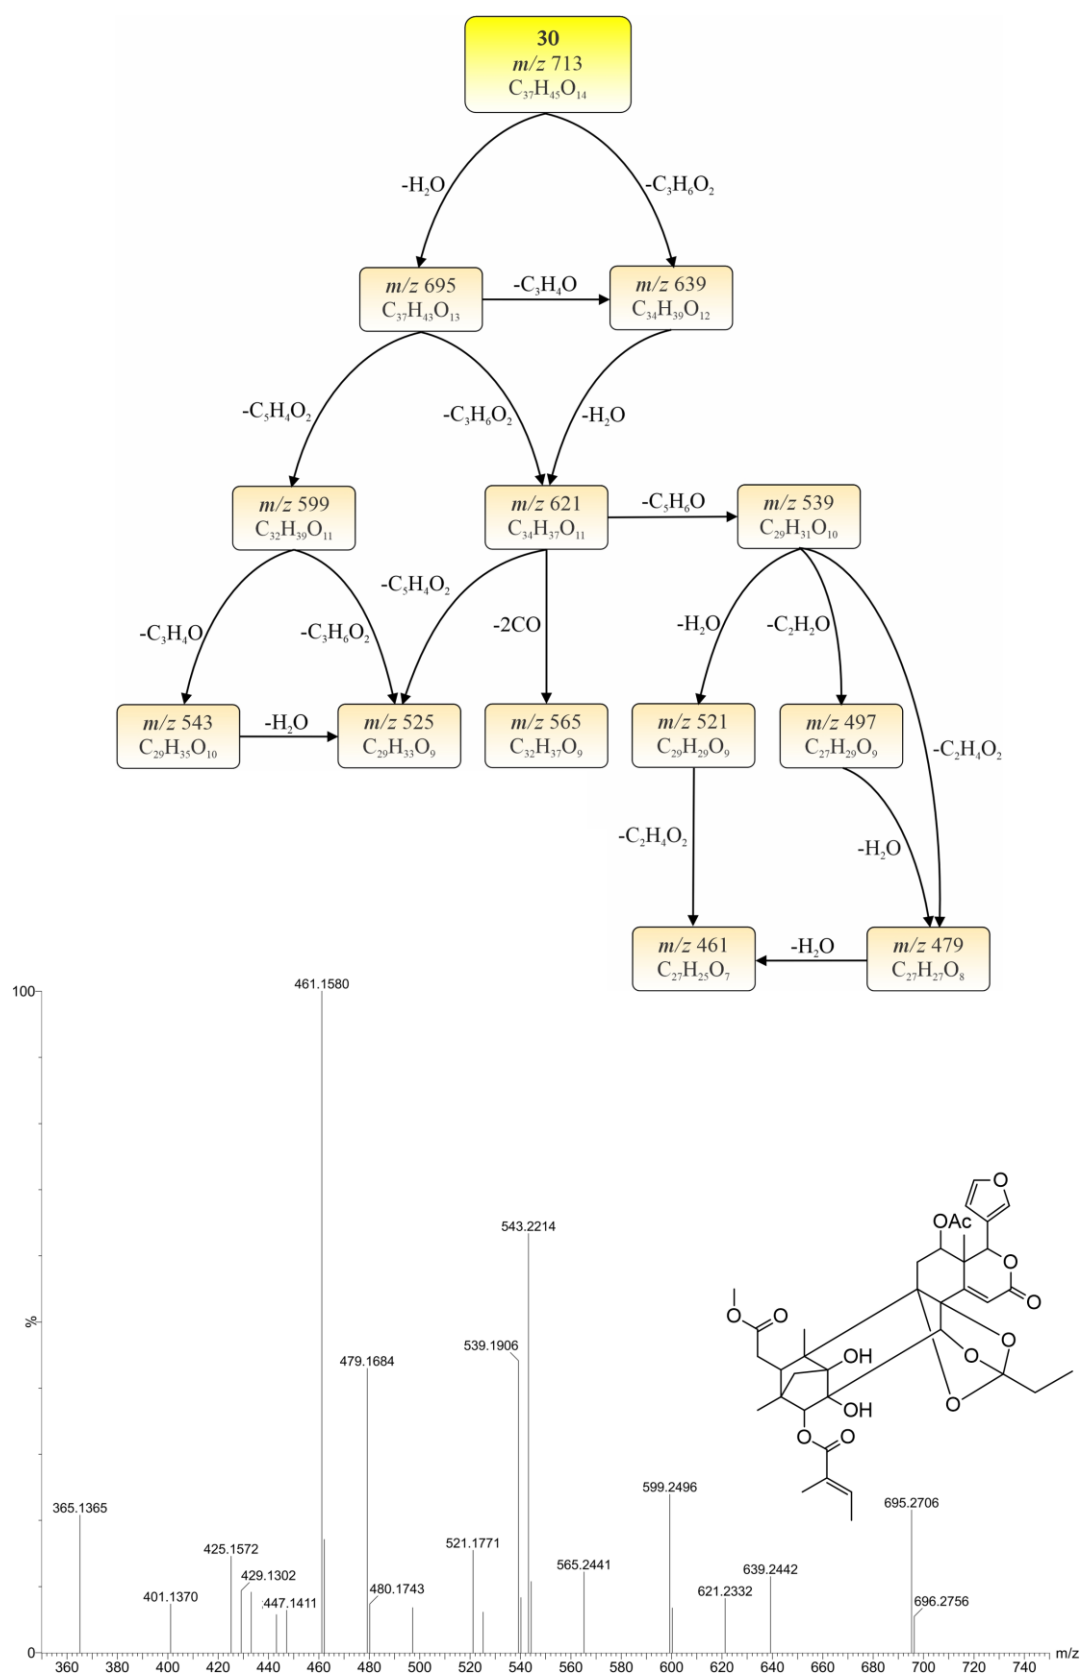

**Figure S31.** Fragmentation pattern of limonoid **30** computed from tandem MS data.

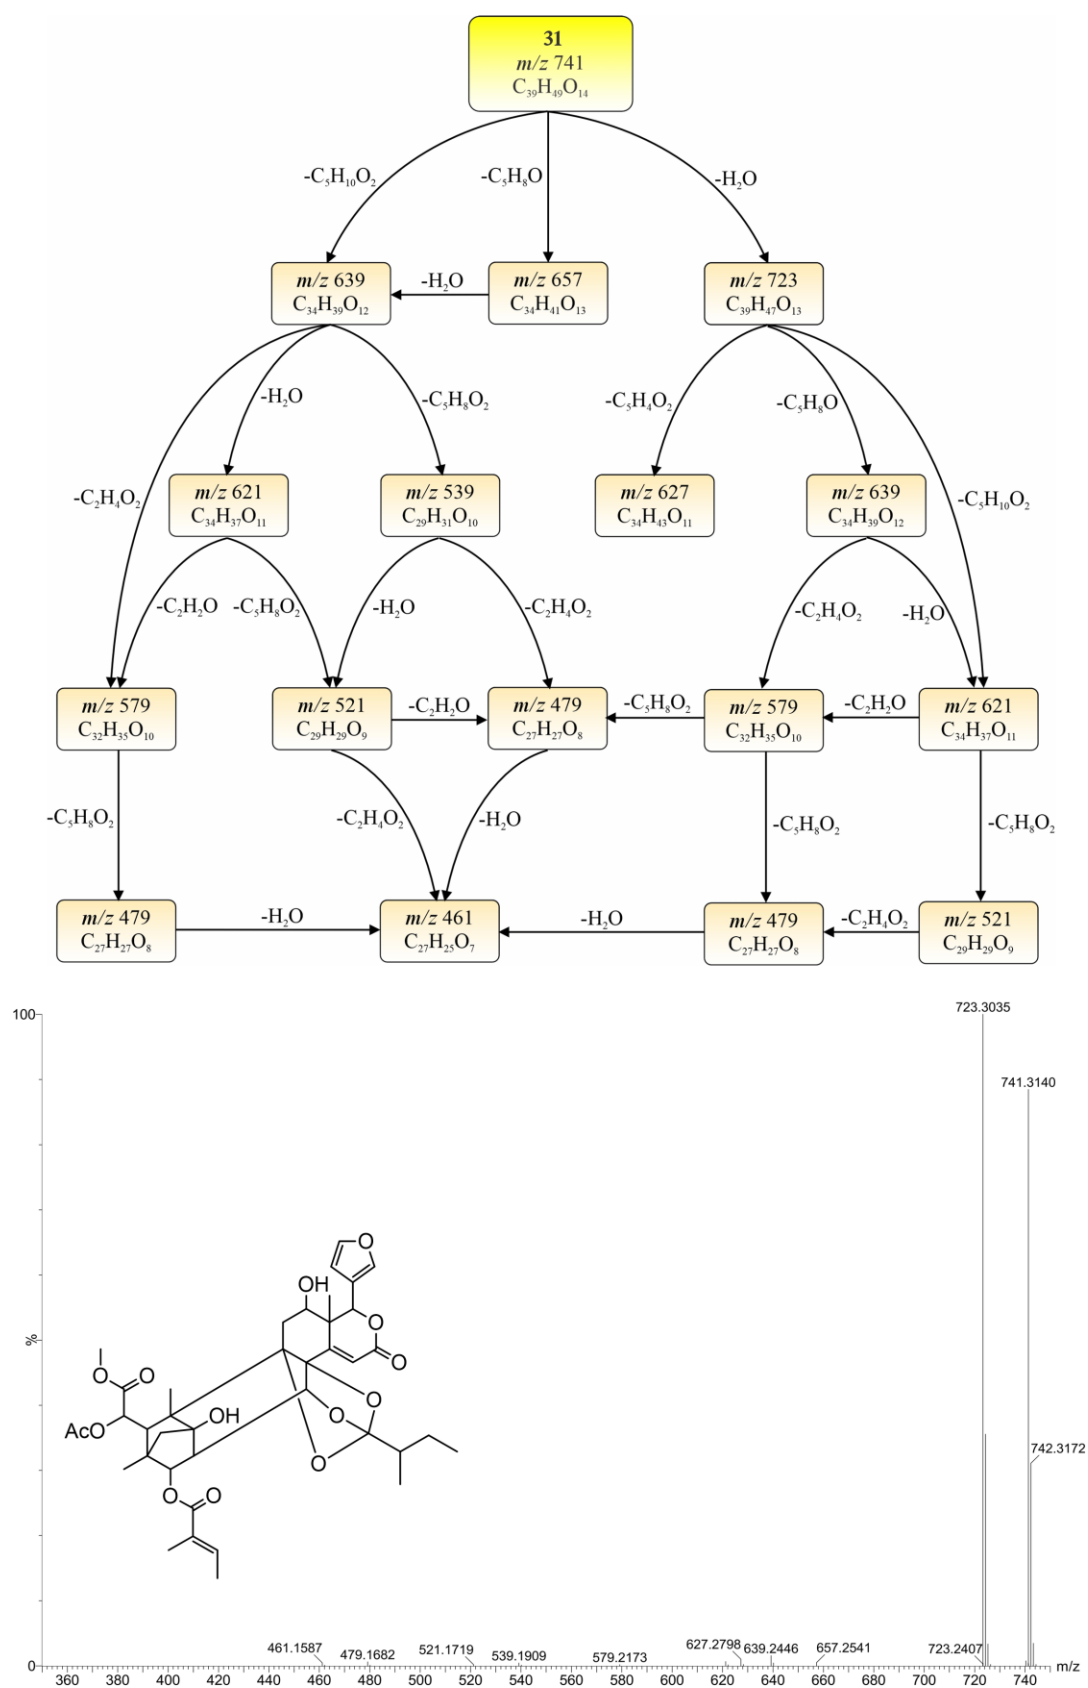

Figure S32. Fragmentation pattern of limonoid 31 computed from tandem MS data.

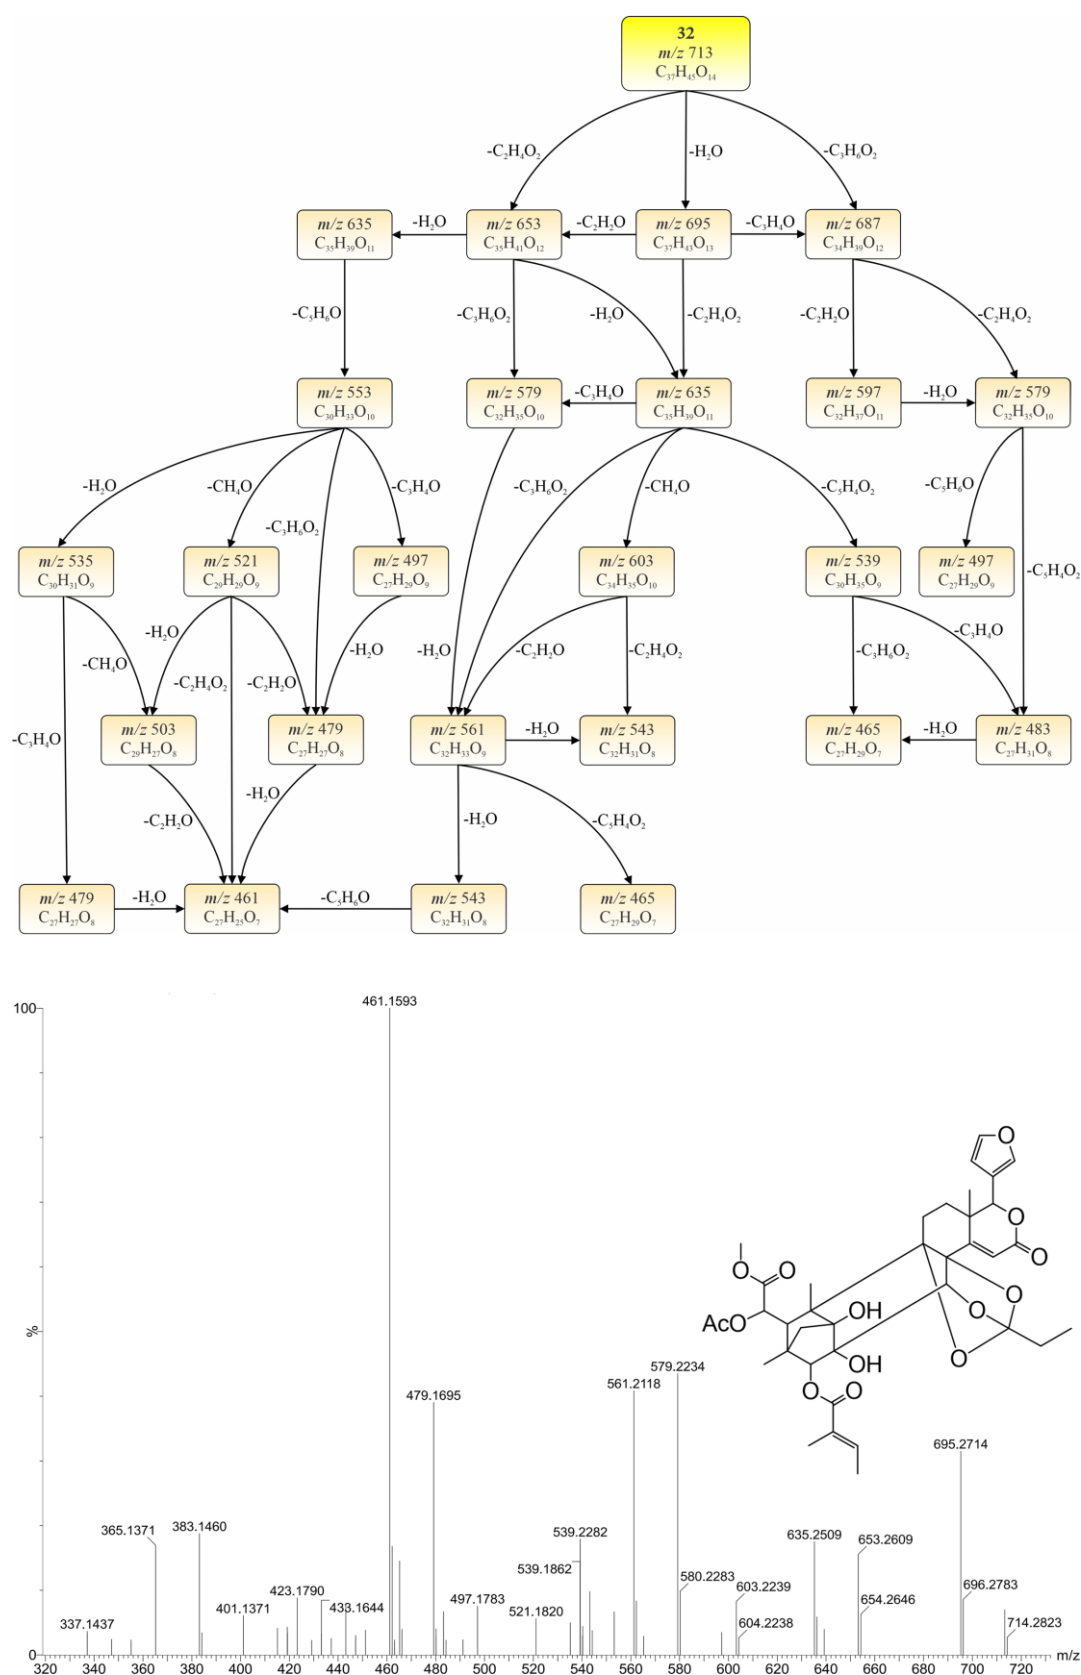

Figure S33. Fragmentation pattern of limonoid 32 computed from tandem MS data.

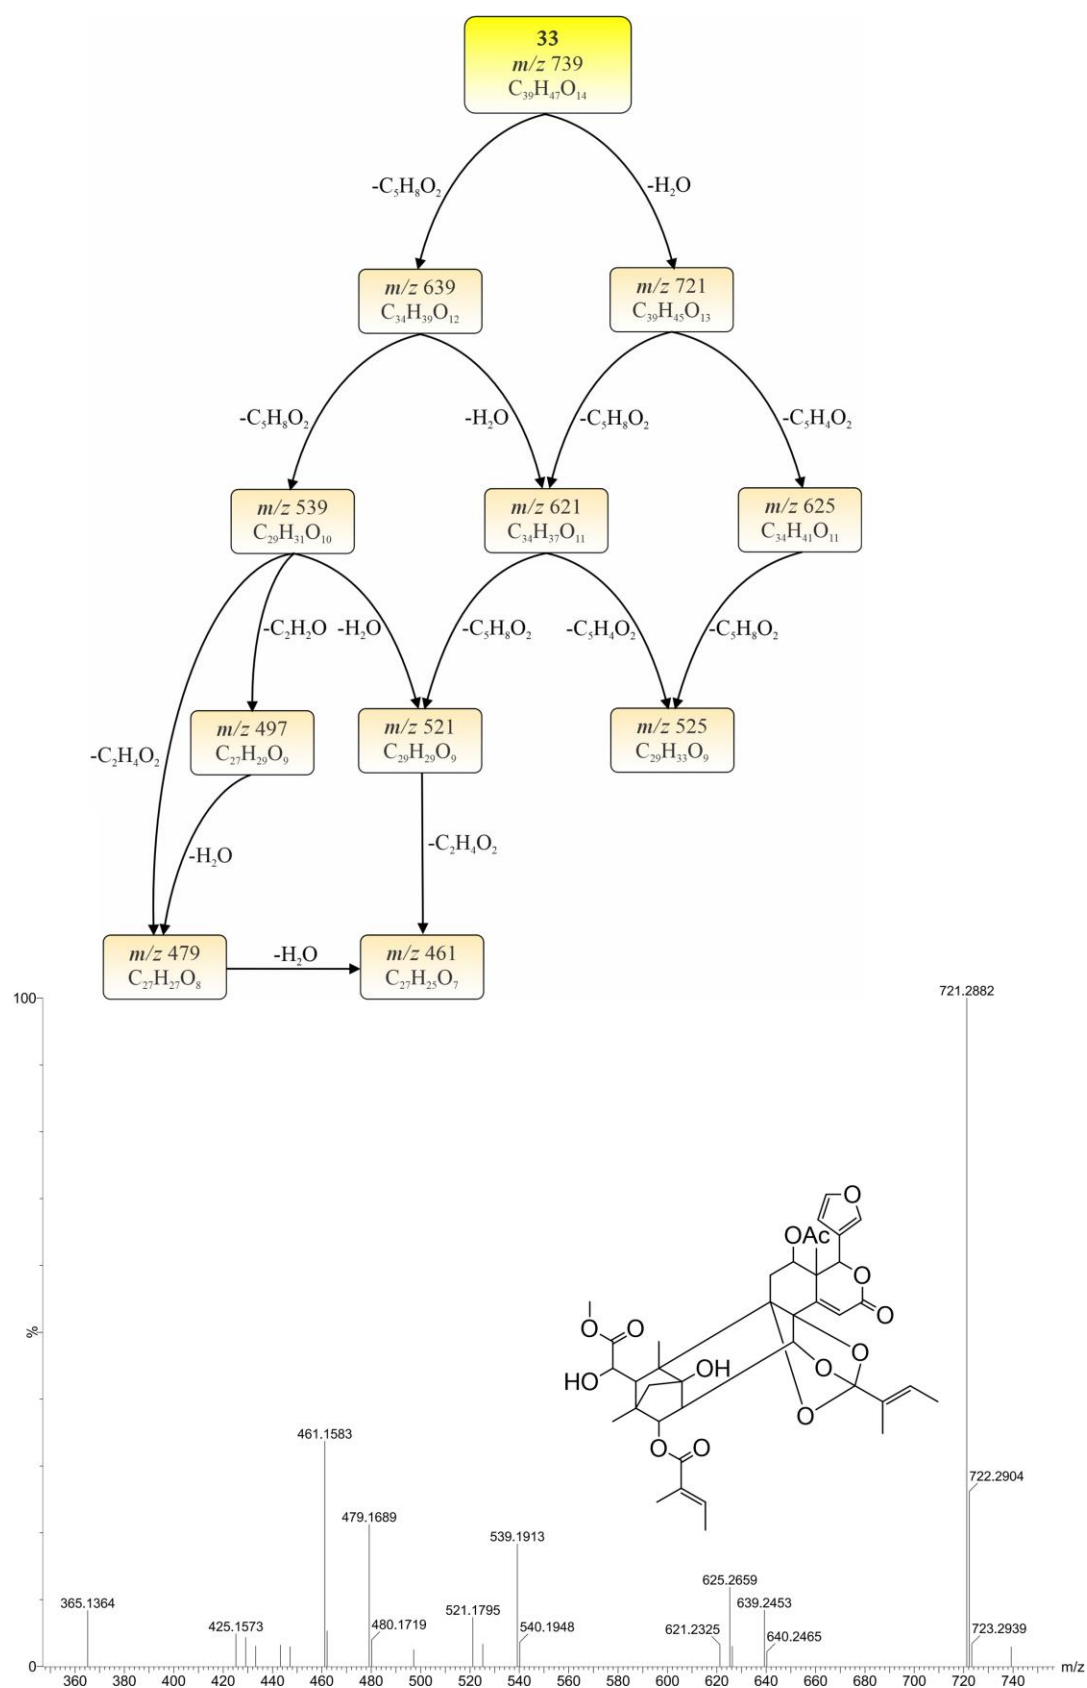

Figure S34. Fragmentation pattern of limonoid **33** computed from tandem MS data.

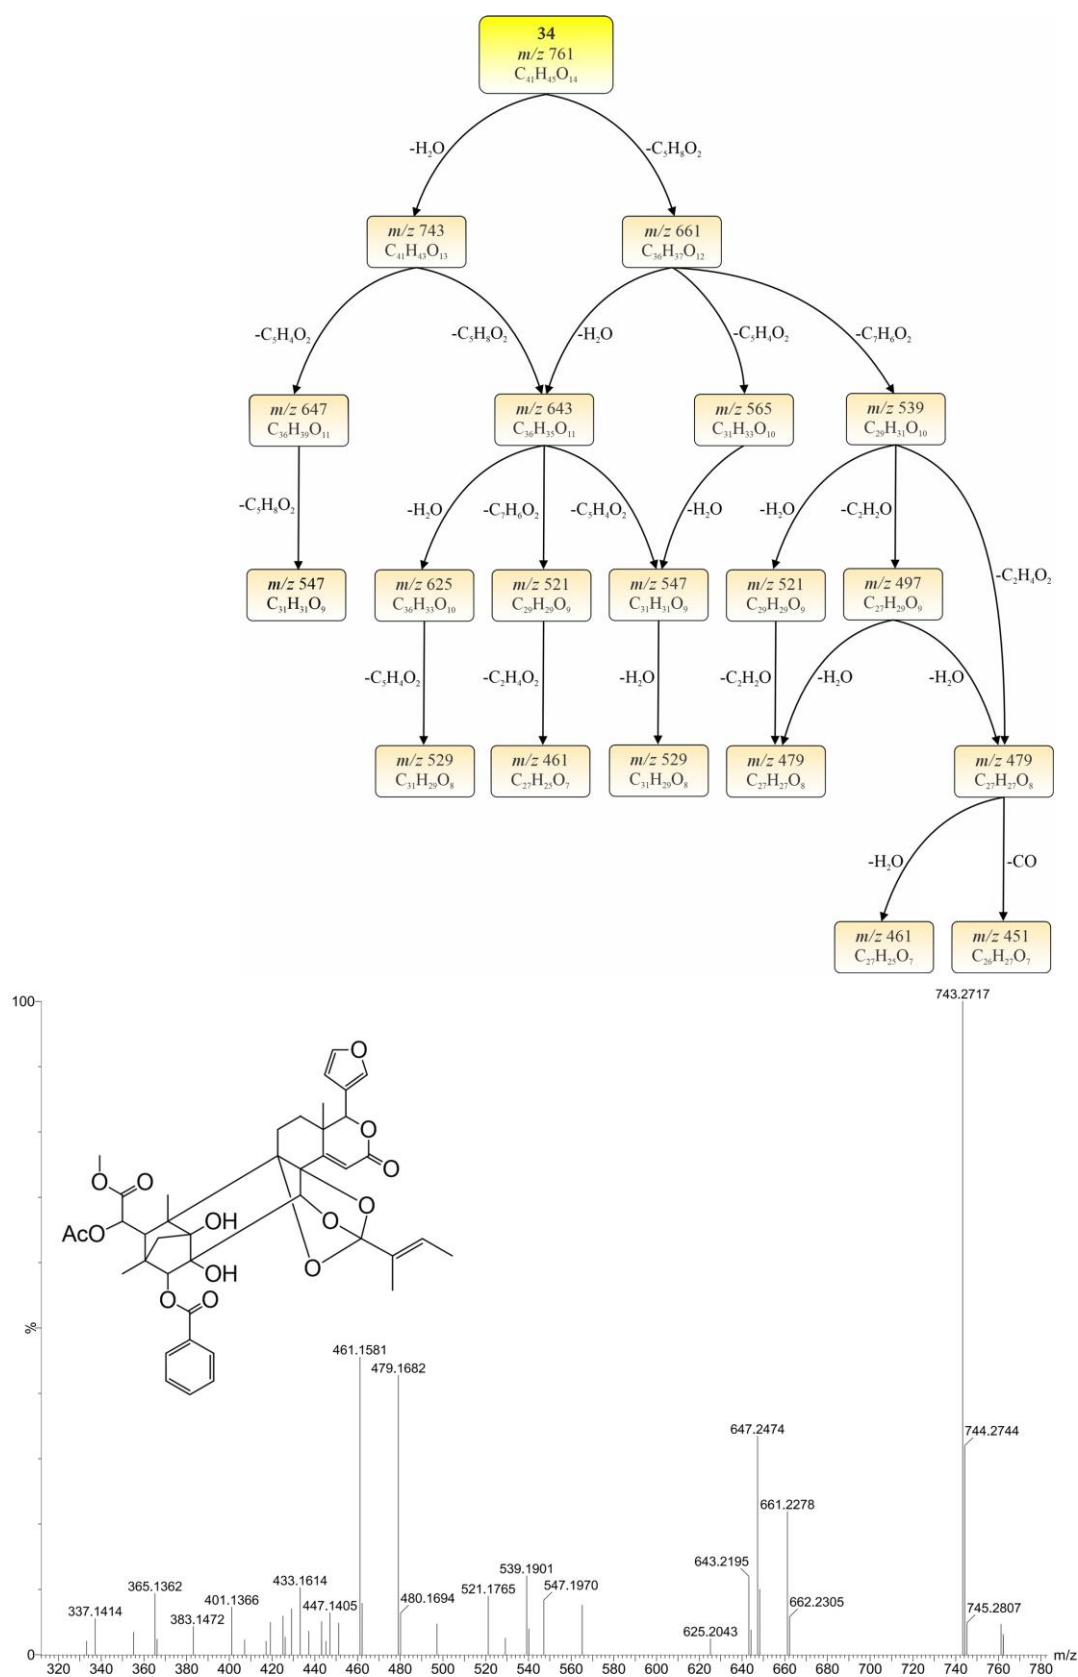

Figure S35. Fragmentation pattern of limonoid 34 computed from tandem MS data.

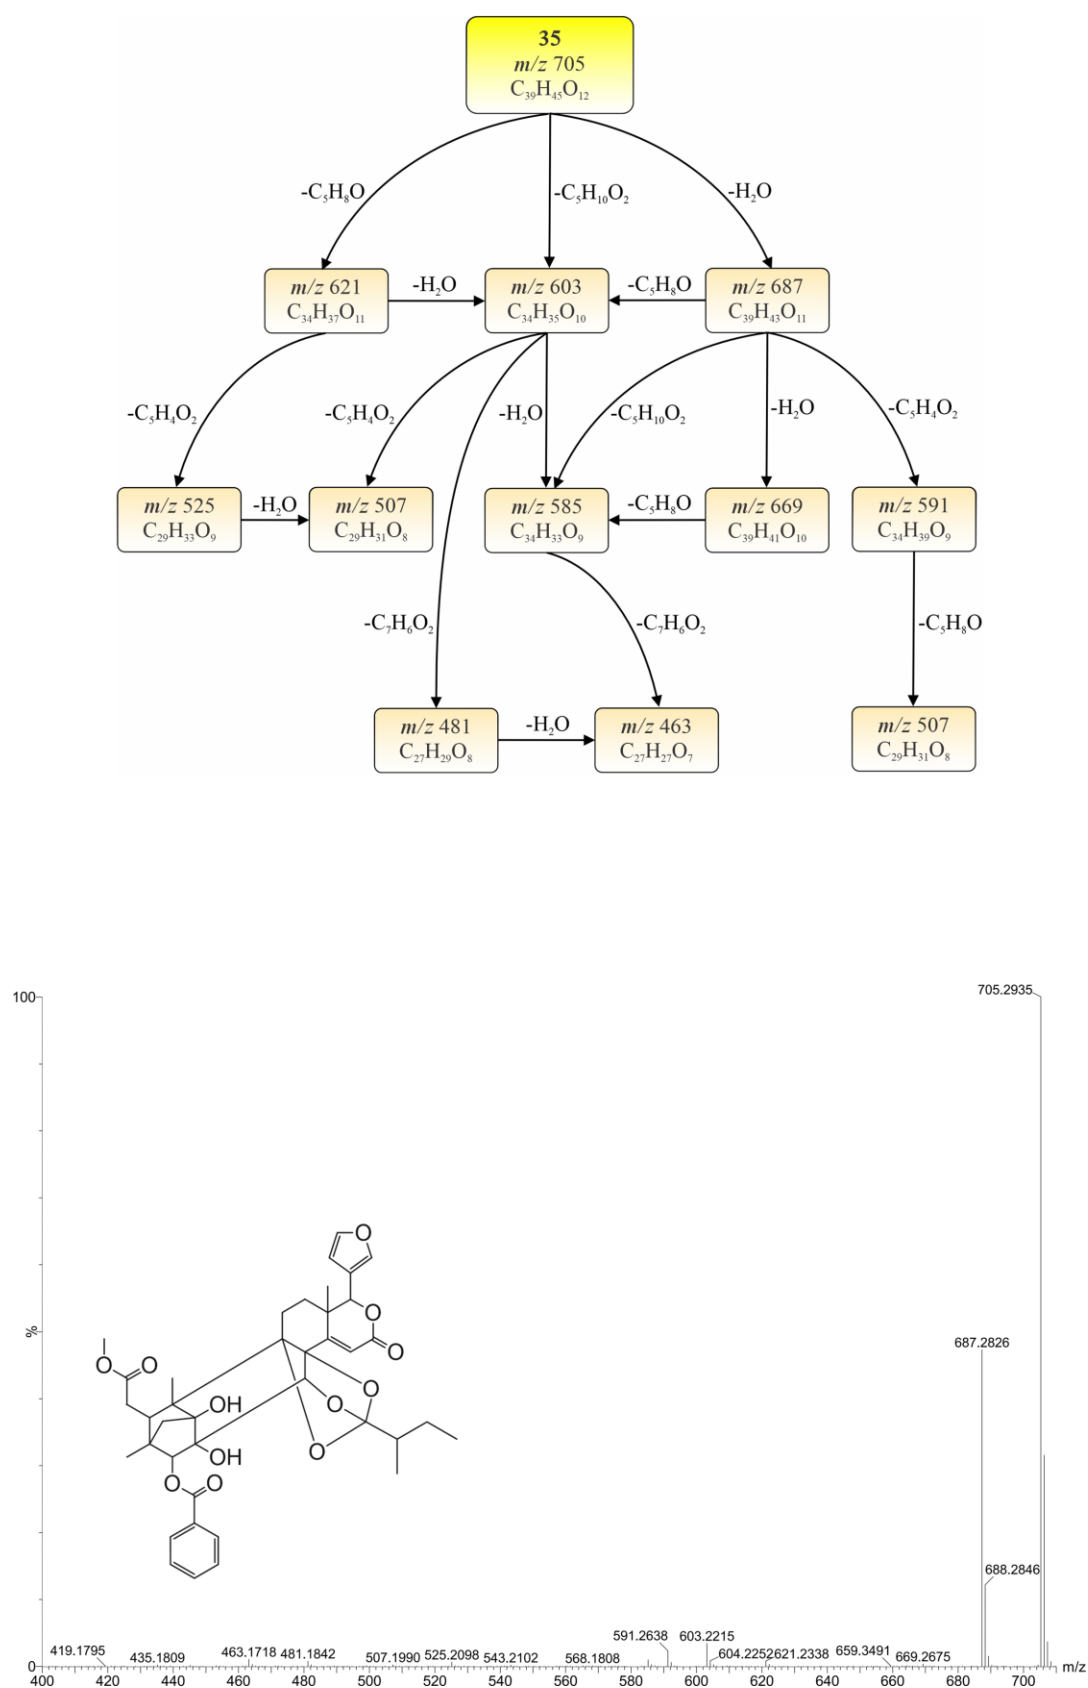

Figure S36. Fragmentation pattern of limonoid 35 computed from tandem MS data.

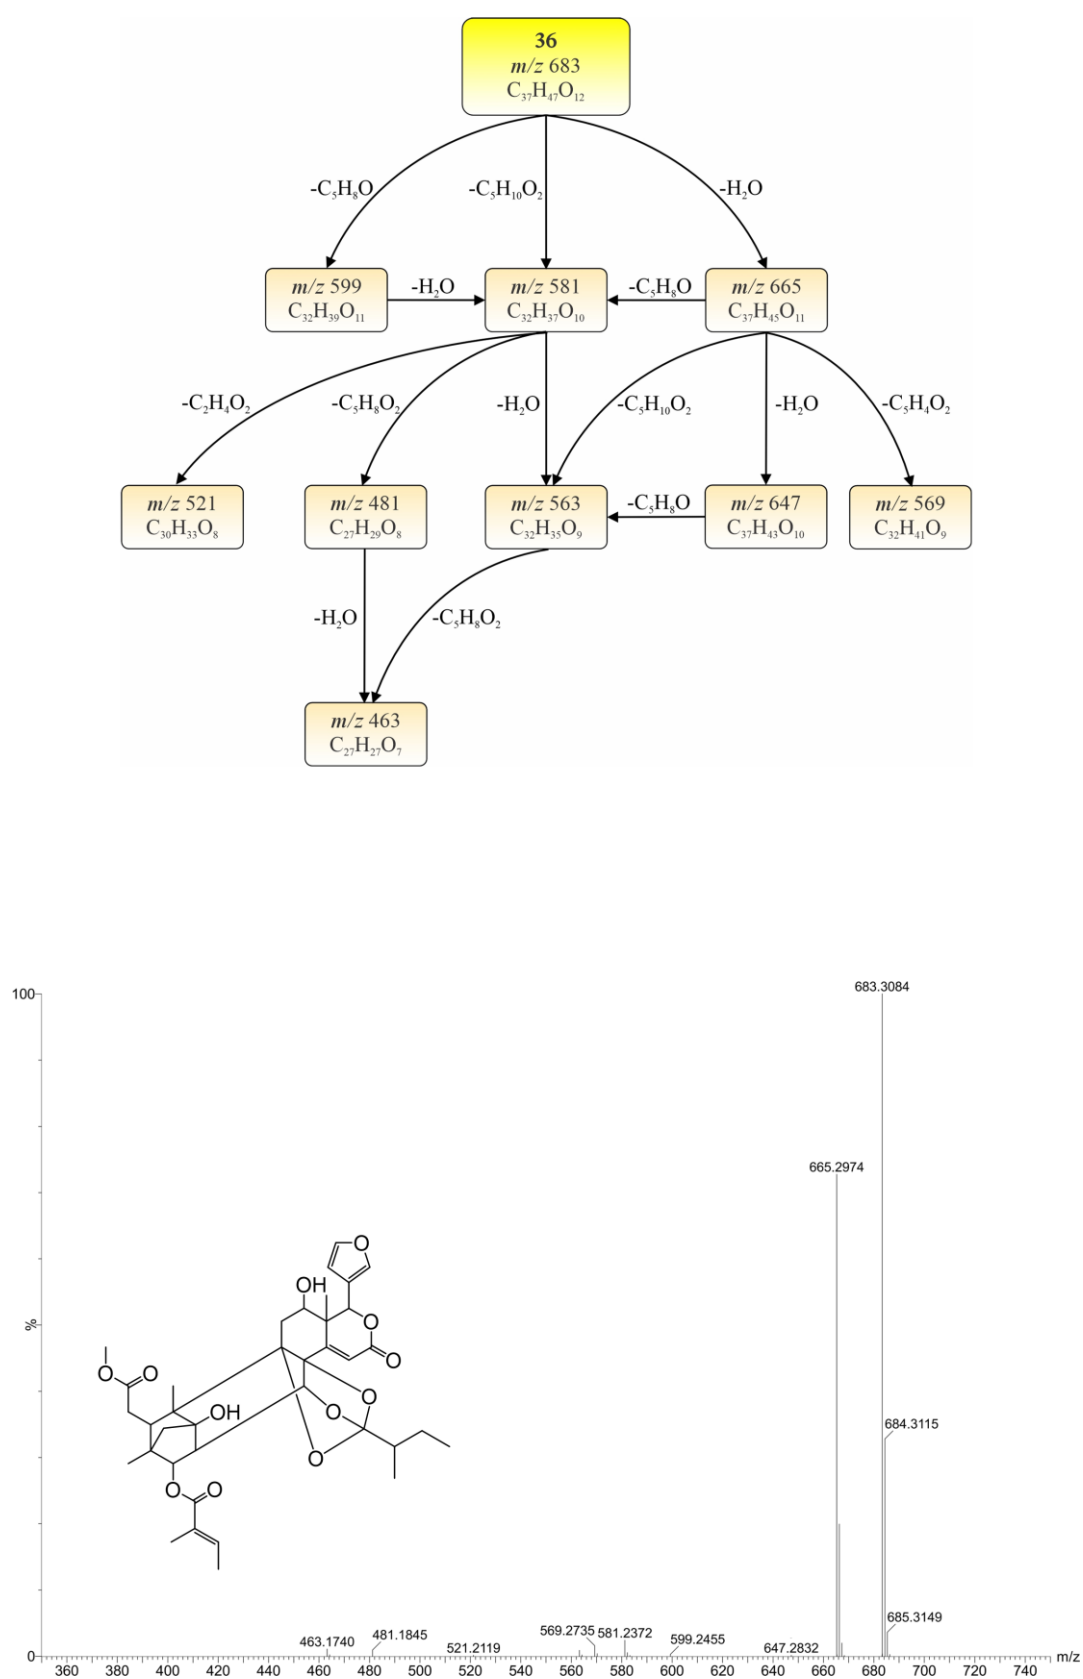

Figure S37. Fragmentation pattern of limonoid **36** computed from tandem MS data.



## References

1. Abdelgaleil, S.A.M.; Doe, M.; Morimoto, Y.; Nakatani, M. Rings B,D-Seco Limonoids from the Leaves of *Swietenia Mahogani*. *Phytochemistry* **2006**, *67*, 452–458.
2. Pamplona, S.G.S.R.; Arruda, M.S.P.; Castro, K.C.F.; Silva, C.Y.Y. e.; Ferreira, A.G.; Silva, M.F.G.F. da; Ohashi, O.S.; Silva, M.N. da Phragmalin Limonoids from *Swietenia Macrophylla* and Their Antifeedant Assay against Mahogany Predator. *J. Braz. Chem. Soc.* **2018**, *29*, 1621–1629.
3. Abdelgaleil, S.A.M.; Doe, M.; Nakatani, M. Rings B,D-Seco Limonoid Antifeedants from *Swietenia Mahogani*. *Phytochemistry* **2013**, *96*, 312–317.
4. Shi, Z.; An, L.; Yang, X.; Xi, Y.; Zhang, C.; Shuo, Y.; Zhang, J.; Jin, D.-Q.; Ohizumi, Y.; Lee, D.; et al. Nitric Oxide Inhibitory Limonoids as Potential Anti-Neuroinflammatory Agents from *Swietenia Mahogani*. *Bioorg. Chem.* **2019**, *84*, 177–185.
5. Tan, S.-K.; Osman, H.; Wong, K.-C.; Boey, P.-L. New Phragmalin-Type Limonoids from *Swietenia Macrophylla* King. *Food Chem.* **2009**, *115*, 1279–1285.
6. Chen, J.-J.; Huang, S.-S.; Liao, C.-H.; Wei, D.-C.; Sung, P.-J.; Wang, T.-C.; Cheng, M.-J. A New Phragmalin-Type Limonoid and Anti-Inflammatory Constituents from the Fruits of *Swietenia Macrophylla*. *Food Chem.* **2010**, *120*, 379–384.
7. Silva, M.N.; Arruda, M.S.P.; Castro, K.C.F.; da Silva, M.F. das G.F.; Fernandes, J.B.; Vieira, P.C. Limonoids of the Phragmalin Type from *Swietenia Macrophylla* and Their Chemotaxonomic Significance. *J. Nat. Prod.* **2008**, *71*, 1983–1987.
8. Mi, C.-N.; Li, W.; Chen, H.-Q.; Wang, J.; Cai, C.-H.; Li, S.-P.; Mei, W.-L.; Dai, H.-F. Two New Compounds from the Roots of *Swietenia Macrophylla*. *J. Asian Nat. Prod. Res.* **2019**, *21*, 1005–1012.
9. Zhang, J.; Li, W.; Dai, Y.; Shen, L.; Wu, J. Twenty-Nine New Limonoids with Skeletal Diversity from the Mangrove Plant, *Xylocarpus Moluccensis*. *Mar. Drugs* **2018**, *16*, doi:10.3390/md16010038.
